# Supplementary material for: Palladium-catalyzed reductive electrocarboxylation of allyl esters with carbon dioxide
Source: Royal Society of Chemistry journal article supplement (doi:10.1039/c8qo00507a), 2018-01-01

# **Palladium-Catalyzed Reductive Electrocarboxylation of Allyl Esters with Carbon Dioxide**

**(Supporting Information)**

**Ke-Jin Jiao,<sup>†</sup> Zhao-Ming Li,<sup>†</sup> Xue-Tao Xu,<sup>‡</sup> Li-Pu Zhang,<sup>‡</sup> Yi-Qian Li,  
<sup>‡</sup> Kun Zhang,<sup>‡</sup> and Tian-Sheng Mei<sup>\*,†</sup>**

<sup>†</sup>State Key Laboratory of Organometallic Chemistry, Center for Excellence in Molecular Synthesis, Shanghai Institute of Organic Chemistry, University of Chinese Academy of Sciences, Chinese Academy of Sciences, 345 Lingling Lu, Shanghai 200032, China

<sup>‡</sup>School of Chemical & Environmental Engineering, Wuyi University, Jiangmen, 529020, China

## **Table of Contents**

|                                                              |     |
|--------------------------------------------------------------|-----|
| 1 General Information .....                                  | S2  |
| 2 Structures of Starting Materials .....                     | S3  |
| 3 Synthesis and Characterization of Starting Materials ..... | S4  |
| 4 Conditions Screening of the Reaction .....                 | S22 |
| 5 Photographic Guide for Electrochemical Carboxylation ..... | S24 |
| 6 General Procedure for the Electrolysis.....                | S27 |
| Characterization Data for the Products.....                  | S27 |
| 7 Enantioselective Carboxylation .....                       | S35 |
| 8 Electrochemical Set-up and Cyclic Voltammetry .....        | S40 |
| 9 Reference .....                                            | S43 |
| 10 Spectra of Compounds .....                                | S44 |

## 1 General Information

All the electrochemical reduction were performed in an undivided cell equipped with one platinum electrode ( $1.0 \times 1.0 \text{ cm}^2$ ) and a magnesium rod as sacrificial anode unless otherwise noted. Solvents and commercially available reagents were used without purification. Column chromatography was performed using either 100-200 Mesh or 300-400 Mesh silica gel. Visualization of spots on TLC plate was accomplished with UV light (254 nm) and staining over  $\text{I}_2$  chamber.

All the platinum electrode were purchased from Ida Hengsheng Technology Co., Ltd, Tianjin, China. The potentiostat (E36105A, KEYSIGHT) was purchased from Shiqiang Telecom Co., Ltd, Shengzhen, China. The All commercial reagents were purchased from TCI, Sigma-Aldrich, Adamas-beta, 9-Ding chemistry and Energy Chemical of the highest purity grade. They were used without further purification unless specified.

$^1\text{H}$  NMR and  $^{13}\text{C}$  NMR spectra were recorded on Agilent AV 400, Varian Inova 400 (400 MHz and 100 MHz, respectively).  $^{19}\text{F}$  NMR spectra were recorded on Agilent AV 400, Varian Inova 400 (376 MHz) instrument and are reported relative to the  $\text{CFCl}_3$  as the internal standard. The peaks were internally referenced to TMS (0.00 ppm) or residual undeuterated solvent signal. The following abbreviations were used to explain multiplicities: s = singlet, d = doublet, t = triplet, q = quartet, m = multiplet, and br = broad. Infrared spectra were obtained on a Bio-Rad FTS-185 instrument. High resolution mass spectra were recorded at the Center for Mass Spectrometry, Shanghai Institute of Organic Chemistry. Analytical and spectral data of all those known compounds are exactly matching with the reported values.

## 2 Structures of Starting Materials

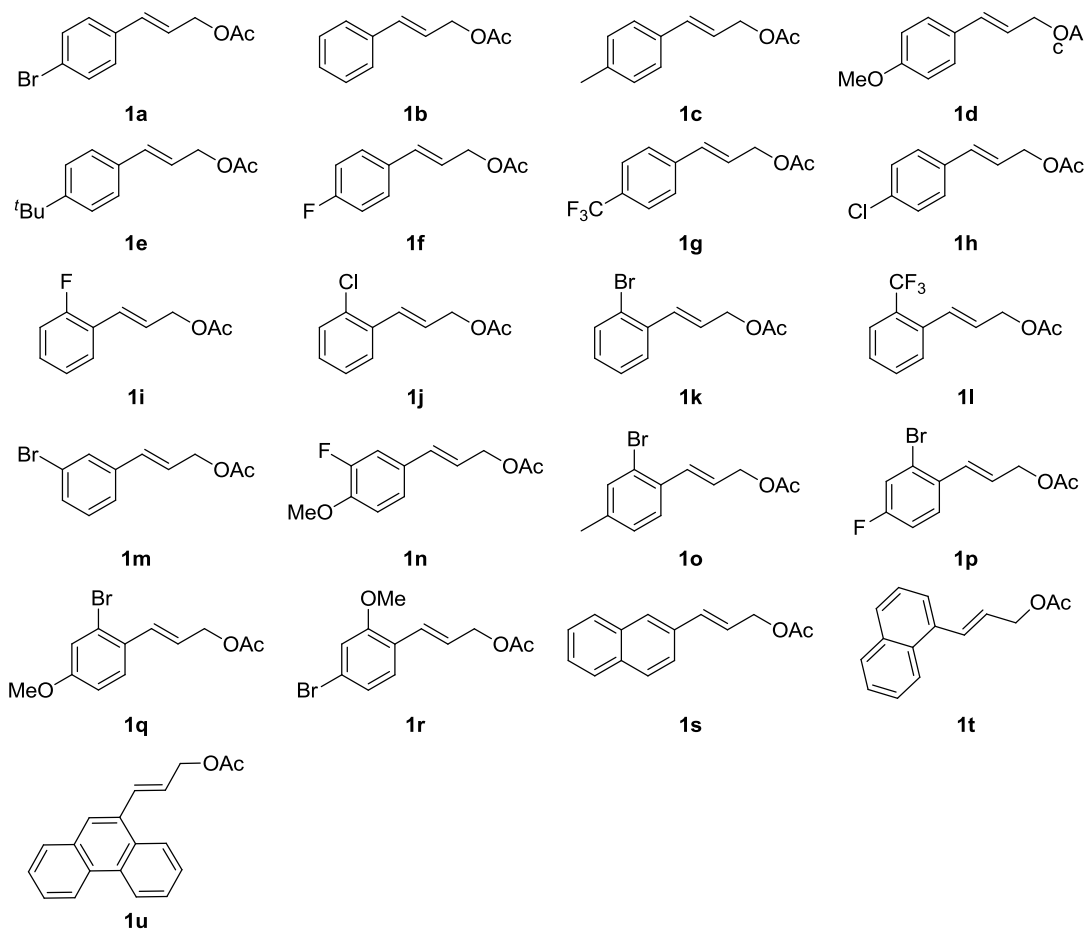

## Cinnamyl ester (3a-3g)

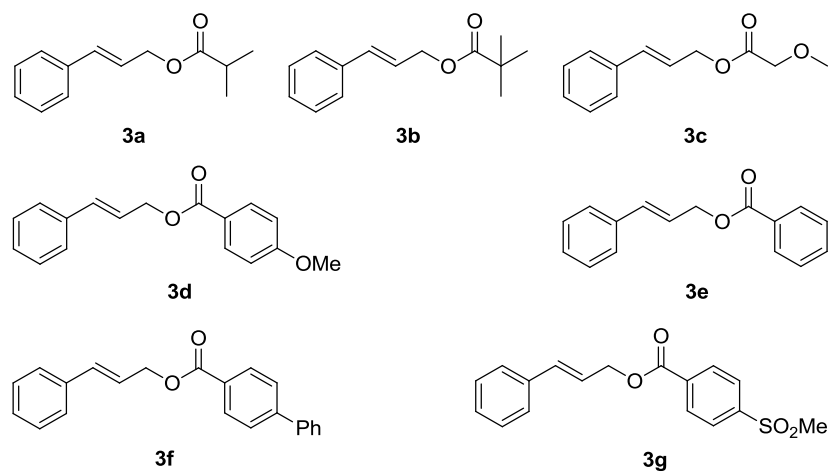

### 3 Synthesis and Characterization of Starting Materials

#### General scheme 1 for the synthesis of 1a, 1c-1u

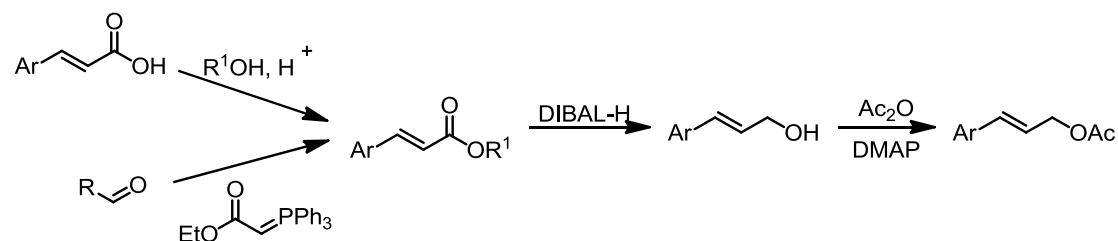

#### General Procedure A: Synthesis of $\alpha,\beta$ -Unsaturated Esters from Aldehydes:

To a stirred solution of the aldehyde (1.0 equiv) in  $\text{CH}_2\text{Cl}_2$  (10 mL/g aldehyde) was added ethyl 2- (triphenylphosphoranylidene)acetate (1.05 equiv). The reaction was stirred overnight at rt, concentrated *in vacuo*, the residue triturated with PE /  $\text{Et}_2\text{O}$  (9:1), and the solids removed by filtration. The solvent was removed *in vacuo* and the crude residue purified by flash chromatography on silica gel to leave the pure  $\alpha,\beta$ -unsaturated esters.

#### General Procedure B: Synthesis of $\alpha,\beta$ -Unsaturated Esters from Acids:

To a stirred solution of the  $\alpha,\beta$ -unsaturated acid (1.0 equiv) in ethanol (10 mL / g acid) was added conc.  $\text{H}_2\text{SO}_4$  (0.1 mL / g acid). The reaction was heated at reflux for 3 h, allowed to cool, and concentrated *in vacuo*. The residue was neutralised with  $\text{NaHCO}_3$  (sat. aq.), extracted with  $\text{EtOAc}$  (3 equal volume) and the combined organics washed with brine (equal volume). The organic layer was dried over  $\text{Na}_2\text{SO}_4$ , filtered, and concentrated *in vacuo* to leave the pure  $\alpha,\beta$ -unsaturated esters.

#### General Procedure C: Synthesis of allyl alcohol

To a stirred solution of the  $\alpha,\beta$ -unsaturated ester (1.0 equiv) in anhydrous  $\text{CH}_2\text{Cl}_2$  (0.2 M) at  $-78^\circ\text{C}$  under  $\text{N}_2$  was added DIBAL-H (1.0-1.2 M in toluene *or* hexane, 2.2 equiv) dropwise. The reaction was stirred for 1.5 h at  $-78^\circ\text{C}$ , and quenched with  $\text{NaOH}$  (10% aq.) (equal volume). The resultant mixture was allowed to warm to rt and stirred for 1 h. The layers were separated and the aqueous layer extracted with  $\text{CH}_2\text{Cl}_2$  (2 equal volume). The combined organics were washed with brine (equal volume), dried over  $\text{Na}_2\text{SO}_4$ , filtered, and concentrated *in vacuo* to leave the pure allylic alcohols.

#### General Procedure D: Synthesis of allyl acetate

To a stirred solution of allylic alcohol in  $\text{CH}_2\text{Cl}_2$  (1.1M) was added  $\text{Ac}_2\text{O}$  (2.0 equiv) and DMAP (0.05 equiv). The reaction was stirred at room temperature for 1h, and then  $\text{CH}_3\text{OH}$  (8.0 equiv) was added and stirring continued for a further 1h. The reaction mixture was taken up in hexanes (2.5 equal volume DCM), successively washed with  $\text{H}_2\text{O}$  and a sat.  $\text{NaHCO}_3$  solution (2 x equal volume DCM), and dried over  $\text{MgSO}_4$ . The solution was removed under vacuum and the crude product was purified by

chromatography on SiO<sub>2</sub> with hexane/EtOAc to afford the product

**(E)-3-(4-Bromophenyl)allyl acetate (1a)**<sup>1</sup>

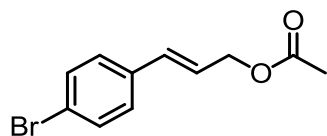

**Route for 1a**

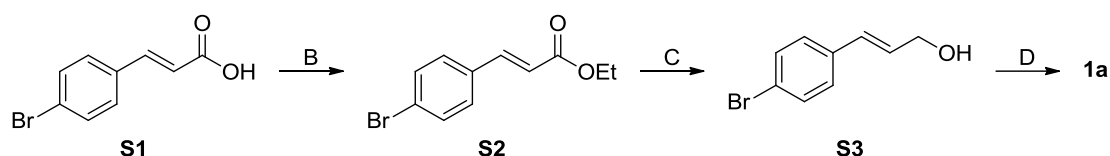

Following general procedure B, the reaction of (E)-3-(4-Bromophenyl)acrylic acid (**S1**) (5.0 g, 22.0 mmol, 1.0 equiv) with conc. H<sub>2</sub>SO<sub>4</sub> (0.50 mL) in EtOH (50 mL) gave the title compound **S2** (5.15 g, 20.2 mmol, 92%) as a colorless oil that was used without further purification.

Following general procedure C, the reaction of (E)-ethyl 3-(4-Bromophenyl)acrylate (**S2**) (5.10 g, 20.0 mmol, 1.0 equiv) in anhydrous CH<sub>2</sub>Cl<sub>2</sub> (100 mL) with DIBAL-H (1.2 M in toluene, 36.7 mL, 44.0 mmol, 2.2 equiv) gave the title compound **S3** (4.81 g, 17.5 mmol, 88%) as a white solid that was used without further purification.

Following general procedure D, the reaction of (E)-3-(4-Bromophenyl)prop-2-en-1-ol (**S3**) (5.00 g, 22.0 mmol, 1.0 equiv) in CH<sub>2</sub>Cl<sub>2</sub> (20 mL) with Ac<sub>2</sub>O (4.30 mL, 44.0 mmol, 2.0 equiv) and DMAP (133.6 mg, 1.1 mmol, 0.05 equiv) gave the title compound **1a** (5.40 g, 21.2 mmol, 96%) as a colorless oil.

<sup>1</sup>H NMR (400 MHz, CDCl<sub>3</sub>) δ 7.43 (d, *J* = 6.8 Hz, 2H), 7.23 (d, *J* = 6.8 Hz, 2H), 6.57 (d, *J* = 16.0 Hz, 1H), 6.34–6.13 (m, 1H), 4.69 (d, *J* = 6.3 Hz, 2H), 2.08 (s, 3H). <sup>13</sup>C NMR (101 MHz, CDCl<sub>3</sub>) δ 170.48, 135.10, 132.54, 131.64, 128.08, 124.09, 121.77, 64.70, 20.89.

**(E)-3-(p-Tolyl)allyl acetate (1c)**<sup>2</sup>

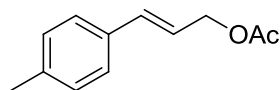

**Route for 1c**

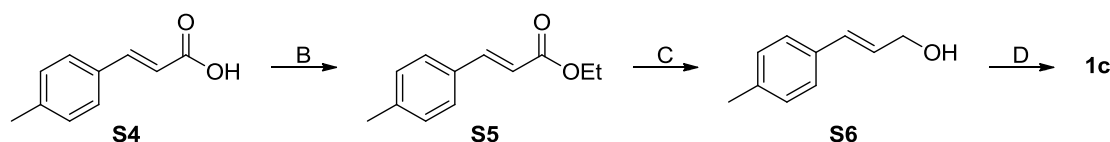

Following general procedure B, the reaction of (E)-3-(p-Tolyl)acrylic acid (**S4**) (5.0 g, 30.8 mmol, 1.0 equiv) with conc. H<sub>2</sub>SO<sub>4</sub> (0.50 mL) in EtOH (50 mL) gave the title compound **S5** (5.74 g, 30.2 mmol, 98%) as a colorless oil that was used without further

purification.

Following general procedure C, the reaction of (E)-ethyl 3-(p-Tolyl)acrylate (**S5**) (5.70 g, 30.0 mmol, 1.0 equiv) in anhydrous CH<sub>2</sub>Cl<sub>2</sub> (150 mL) with DIBAL-H (1.0 M in toluene, 66.0 mL, 66.0 mmol, 2.2 equiv) gave the title compound **S6** (4.36 g, 29.4 mmol, 98%) as a white solid that was used without further purification.

Following general procedure D, the reaction of (E)-3-(p-Tolyl)prop-2-en-1-ol (**S6**) (4.3 g, 29.0 mmol, 1.0 equiv) in CH<sub>2</sub>Cl<sub>2</sub> (25 mL) with Ac<sub>2</sub>O (5.7 mL, 58.0 mmol, 2.0 equiv) and DMAP (177.1 mg, 1.45 mmol, 0.05 equiv) gave the title compound **1c** (4.30 g, 22.6 mmol, 78%) as a colorless oil.

<sup>1</sup>H NMR (400 MHz, CDCl<sub>3</sub>) δ 7.29 (d, *J* = 8.1 Hz, 2H), 7.13 (d, *J* = 8.0 Hz, 2H), 6.62 (d, *J* = 15.9 Hz, 1H), 6.24 (dt, *J* = 15.9, 6.5 Hz, 1H), 4.72 (d, *J* = 6.6 Hz, 2H), 2.34 (s, 3H), 2.10 (s, 3H). <sup>13</sup>C NMR (101 MHz, CDCl<sub>3</sub>) δ 170.76, 137.91, 134.22, 133.43, 129.32, 126.56, 122.08, 65.22, 21.22, 20.97.

#### (E)-3-(4-Methoxyphenyl)allyl acetate (**1d**)<sup>2</sup>

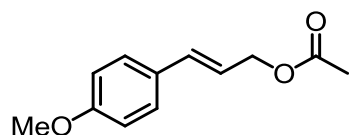

Route for **1d**

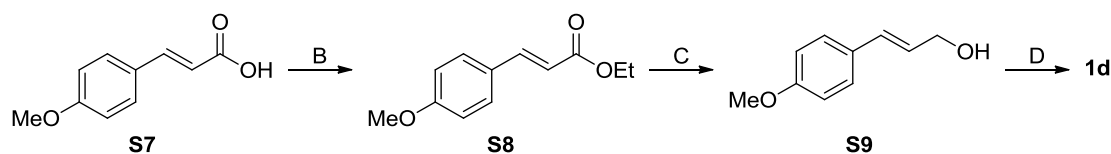

Following general procedure B, the reaction of (E)-3-(4-Methoxyphenyl)acrylic acid (**S7**) (5.0 g, 28.1 mmol, 1.0 equiv) with conc. H<sub>2</sub>SO<sub>4</sub> (0.50 mL) in EtOH (50 mL) gave the title compound **S8** (5.03 g, 24.4 mmol, 87%) as a white solid that was used without further purification.

Following general procedure C, the reaction of (E)-ethyl-3-(4-Methoxyphenyl)acrylate (**S8**) (3.3 g, 16.0 mmol, 1.0 equiv) in anhydrous CH<sub>2</sub>Cl<sub>2</sub> (80 mL) with DIBAL-H (1.0 M in hexane, 35.2 mL, 35.2 mmol, 2.2 equiv) gave the title compound **S9** (2.2 g, 14.8 mmol, 93%) as a white solid that was used without further purification.

Following general procedure D, the reaction of (E)-3-(4-Methoxyphenyl)prop-2-en-1-ol (**S9**) (2.0 g, 13.5 mmol, 1.0 equiv) in CH<sub>2</sub>Cl<sub>2</sub> (13 mL) with Ac<sub>2</sub>O (2.60 mL, 27.0 mmol, 2.0 equiv) and DMAP (83.1 mg, 0.68 mmol, 0.05 equiv) gave the title compound **1d** (1.8 g, 8.8 mmol, 65%) as a colorless oil.

<sup>1</sup>H NMR (400 MHz, CDCl<sub>3</sub>) δ 7.32 (d, *J* = 8.7 Hz, 2H), 6.85 (d, *J* = 8.7 Hz, 2H), 6.59 (d, *J* = 15.8 Hz, 1H), 6.14 (dt, *J* = 15.8, 6.6 Hz, 1H), 4.69 (d, *J* = 6.6 Hz, 2H), 3.79 (s, 3H), 2.08 (s, 3H). <sup>13</sup>C NMR (101 MHz, CDCl<sub>3</sub>) δ 170.84, 159.56, 133.98, 128.89,

127.84, 120.79, 113.98, 77.50, 77.18, 76.86, 65.33, 55.20, 20.99.

**(E)-3-(4-(tert-Butyl)phenyl)allyl acetate (1e)**

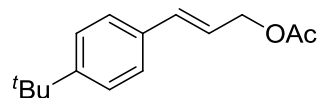

**Route for 1d**

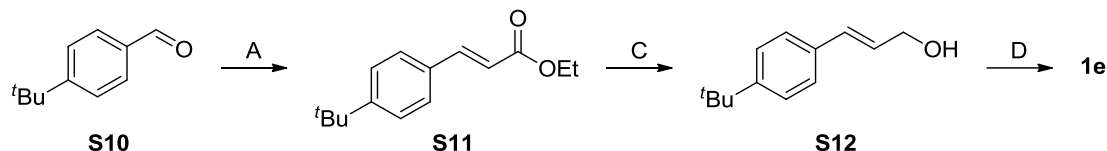

Following general procedure A, the reaction of 4-(tert-butyl)benzaldehyde (**S10**) (4.87 g, 30.0 mmol, 1.0 equiv) with the phosphorane (10.90 g, 31.5 mmol, 1.05 equiv) in  $\text{CH}_2\text{Cl}_2$  (50 mL) gave the title compound **S11** (6.06 g, 26.1 mmol, 87%) as a white solid that was used without further purification.

Following general procedure C, the reaction of (E)-ethyl-3-(4-(tert-Butyl)phenyl)acrylate (**S11**) (4.00 g, 17.2 mmol, 1.0 equiv) in anhydrous  $\text{CH}_2\text{Cl}_2$  (86 mL) with DIBAL-H (1.0 M in hexane, 37.9 mL, 37.9 mmol, 2.2 equiv) gave the title compound **S12** (3.2 g, 16.8 mmol, 98%) as a white solid that was used without further purification.

Following general procedure D, the reaction of (E)-3-(4-(tert-Butyl)phenyl)prop-2-en-1-ol (**S12**) (3.20 g, 16.8 mmol, 1.0 equiv) in  $\text{CH}_2\text{Cl}_2$  (15 mL) with  $\text{Ac}_2\text{O}$  (3.20 mL, 33.6 mmol, 2.0 equiv) and DMAP (102.6 mg, 0.84 mmol, 0.05 equiv) gave the title compound **1e** (3.79 g, 16.3 mmol, 97%) as a colorless oil.

$^1\text{H}$  NMR (400 MHz,  $\text{CDCl}_3$ )  $\delta$  7.39–7.33 (m, 4H), 6.66 (d,  $J = 15.9$  Hz, 1H), 6.28 (dt,  $J = 15.9, 6.5$  Hz, 1H), 4.74 (d,  $J = 6.5$  Hz, 2H), 2.11 (s, 3H), 1.34 (s, 9H).  $^{13}\text{C}$  NMR (101 MHz,  $\text{CDCl}_3$ )  $\delta$  170.77, 151.17, 134.13, 133.45, 126.40, 125.53, 122.36, 65.23, 34.61, 31.30, 21.00.

**(E)-3-(4-Fluorophenyl)allyl acetate (1f)**<sup>1</sup>

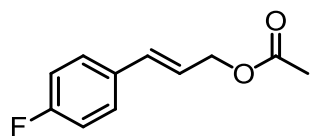

**Route for 1f**

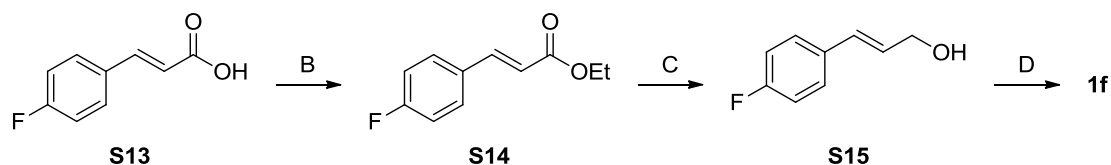

Following general procedure B, the reaction of (E)-3-(4-Fluorophenyl)acrylic acid (**S13**) (5.0 g, 30.1 mmol, 1.0 equiv) with conc.  $\text{H}_2\text{SO}_4$  (0.50 mL) in EtOH (50 mL) gave the title compound **S14** (4.97 g, 25.6 mmol, 85%) as a colorless oil that was used without further purification.

Following general procedure C, the reaction of (E)-ethyl-3-(4-Fluorophenyl)acrylate (**S14**) (4.90 g, 25.2 mmol, 1.0 equiv) in anhydrous CH<sub>2</sub>Cl<sub>2</sub> (120 mL) with DIBAL-H (1.0 M in toluene, 56.0 mL, 55.4 mmol, 2.2 equiv) gave the title compound **S15** (3.79 g, 24.9 mmol, 99%) as a white solid that was used without further purification.

Following general procedure D, the reaction of (E)-3-(4-Fluorophenyl)prop-2-en-1-ol (**S15**) (2.0 g, 13.1 mmol, 1.0 equiv) in CH<sub>2</sub>Cl<sub>2</sub> (12 mL) with Ac<sub>2</sub>O (2.5 mL, 26.2 mmol, 2.0 equiv) and DMAP (80.3 mg, 0.66 mmol, 0.05 equiv) gave the title compound **1f** (2.02 g, 10.4 mmol, 79%) as a colorless oil.

<sup>1</sup>H NMR (400 MHz, CDCl<sub>3</sub>) δ 7.36–7.26 (m, 2H), 6.99 (t, *J* = 8.6 Hz, 2H), 6.59 (d, *J* = 15.9 Hz, 1H), 6.18 (dt, *J* = 15.9, 6.5 Hz, 1H), 4.69 (d, *J* = 6.5 Hz, 2H), 2.08 (s, 3H). <sup>13</sup>C NMR (101 MHz, cdcl<sub>3</sub>) δ 170.71, 162.49 (d, *J* = 247.4 Hz), 132.87, 132.36 (d, *J* = 3.3 Hz), 128.13 (d, *J* = 8.1 Hz), 122.93 (d, *J* = 2.3 Hz), 115.46 (d, *J* = 21.6 Hz), 64.87, 20.81. <sup>19</sup>F NMR (376 MHz, CDCl<sub>3</sub>) δ -113.68.

### (E)-3-(4-(Trifluoromethyl)phenyl)allyl acetate (**1g**)<sup>1</sup>

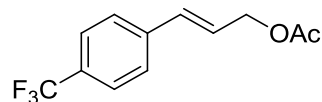

Route for **1g**

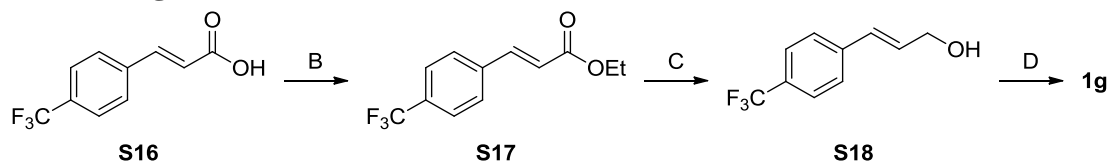

Following general procedure B, the reaction of (E)-3-(4-(Trifluoromethyl)phenyl)acrylic acid (**S16**) (2.0 g, 9.25 mmol, 1.0 equiv) with conc. H<sub>2</sub>SO<sub>4</sub> (0.20 mL) in EtOH (20 mL) gave the title compound **S17** (2.20 g, 9.01 mmol, 97%) as a white solid that was used without further purification.

Following general procedure C, the reaction of (E)-ethyl 3-(4-(Trifluoromethyl)phenyl)acrylate (**S17**) (2.16 g, 8.84 mmol, 1.0 equiv) in anhydrous CH<sub>2</sub>Cl<sub>2</sub> (45 mL) with DIBAL-H (1.2 M in toluene, 16.21 mL, 19.45 mmol, 2.2 equiv) gave the title compound **S18** (1.70 g, 8.40 mmol, 95%) as a white solid that was used without further purification.

Following general procedure D, the reaction of (E)-3-(4-(Trifluoromethyl)phenyl)prop-2-en-1-ol (**S18**) (1.65 g, 8.16 mmol, 1.0 equiv) in CH<sub>2</sub>Cl<sub>2</sub> (8 mL) with Ac<sub>2</sub>O (1.53 mL, 16.32 mmol, 2.0 equiv) and DMAP (49.8 mg, 0.41 mmol, 0.05 equiv) gave the title compound **1g** (1.91 g, 7.83 mmol, 96%) as a colorless oil.

<sup>1</sup>H NMR (400 MHz, CDCl<sub>3</sub>) δ 7.56 (d, *J* = 8.2 Hz, 2H), 7.46 (d, *J* = 8.1 Hz, 2H), 6.66 (d, *J* = 16.0 Hz, 1H), 6.36 (dt, *J* = 15.9, 6.2 Hz, 1H), 4.74 (d, *J* = 6.2 Hz, 2H), 2.10 (s, 3H). <sup>19</sup>F NMR (376 MHz, CDCl<sub>3</sub>) δ -62.64.

### (E)-3-(4-Chlorophenyl)allyl acetate (**1h**)<sup>1</sup>



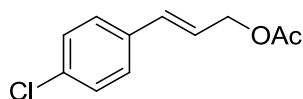

#### Route for **1h**

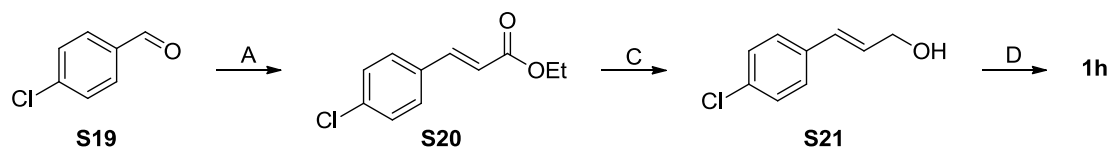

Following general procedure A, the reaction of 4-Chlorobenzaldehyde (**S19**) (2.81 g, 20.0 mmol, 1.0 equiv) with the phosphorane (7.32 g, 21.0 mmol, 1.05 equiv) in  $\text{CH}_2\text{Cl}_2$  (30 mL) gave the title compound **S20** (4.17 g, 19.8 mmol, 99%) as a colorless oil that was used without further purification.

Following general procedure C, the reaction of (E)-ethyl 3-(4-Chlorophenyl)acrylate (**S20**) (4.10 g, 19.5 mmol, 1.0 equiv) in anhydrous  $\text{CH}_2\text{Cl}_2$  (90 mL) with DIBAL-H (1.0 M in toluene, 43.0 mL, 42.9 mmol, 2.2 equiv) gave the title compound **S21** (3.22 g, 19.1 mmol, 98%) as a colorless oil that was used without further purification.

Following general procedure D, the reaction of (E)-3-(4-Chlorophenyl)prop-2-en-1-ol (**S21**) (3.00 g, 17.8 mmol, 1.0 equiv) in  $\text{CH}_2\text{Cl}_2$  (16 mL) with  $\text{Ac}_2\text{O}$  (3.5 mL, 35.6 mmol, 2.0 equiv) and DMAP (108.7 mg, 0.89 mmol, 0.05 equiv) gave the title compound **1h** (3.18 g, 15.1 mmol, 85%) as a colorless oil

**$^1\text{H}$  NMR** (400 MHz,  $\text{CDCl}_3$ )  $\delta$  7.35–7.18 (m, 4H), 6.58 (d,  $J = 15.9$  Hz, 1H), 6.24 (dt,  $J = 15.9, 6.4$  Hz, 1H), 4.70 (d,  $J = 6.4$  Hz, 2H), 2.09 (s, 3H).  **$^{13}\text{C}$  NMR** (101 MHz,  $\text{CDCl}_3$ )  $\delta$  170.69, 134.68, 133.63, 132.68, 128.73, 127.78, 123.90, 64.79, 20.92.

#### (E)-3-(2-Fluorophenyl)allyl acetate (**1i**)<sup>2</sup>

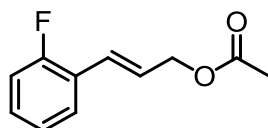

#### Route for **1i**

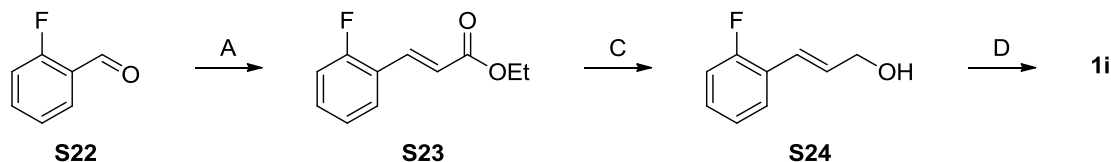

Following general procedure A, the reaction of 2-Fluorobenzaldehyde (**S22**) (2.5 g, 20.0 mmol, 1.0 equiv) with the phosphorane (7.32 g, 21.0 mmol, 1.05 equiv) in  $\text{CH}_2\text{Cl}_2$  (25 mL) gave the title compound **S23** (3.50 g, 18.0 mmol, 90%) as a colorless oil that was used without further purification.

Following general procedure C, the reaction of (E)-ethyl 3-(2-Fluorophenyl)acrylate (**S23**) (3.50 g, 18.0 mmol, 1.0 equiv) in anhydrous  $\text{CH}_2\text{Cl}_2$  (90 mL) with DIBAL-H (1.0

M in toluene, 39.6 mL, 39.6 mmol, 2.2 equiv) gave the title compound **S24** (2.50 g, 16.4 mmol, 91%) as a colorless oil that was used without further purification.

Following general procedure D, the reaction of (E)-3-(2-Fluorophenyl)prop-2-en-1-ol (**S24**) (2.50 g, 16.4 mmol, 1.0 equiv) in CH<sub>2</sub>Cl<sub>2</sub> (15 mL) with Ac<sub>2</sub>O (3.1 mL, 32.8 mmol, 2.0 equiv) and DMAP (100.1 mg, 0.82 mmol, 0.05 equiv) gave the title compound **1i** (2.84 g, 14.6 mmol, 89%) as a colorless oil. **mixture of *cis* and *trans* isomers**

<sup>1</sup>H NMR (400 MHz, CDCl<sub>3</sub>) δ 7.38 (t, *J* = 7.6 Hz, 1H), 7.20–7.11 (m, 1H), 7.06–6.93 (m, 2H), 6.74 (d, *J* = 16.1 Hz, 1H), 6.32 (dt, *J* = 16.0, 6.2 Hz, 1H), 4.68 (d, *J* = 6.2 Hz, 2H), 2.04 (s, 3H). <sup>13</sup>C NMR (101 MHz, CDCl<sub>3</sub>) δ 170.69, 160.26 (d, *J* = 249.7 Hz), 129.31 (d, *J* = 8.5 Hz), 127.54 (d, *J* = 3.6 Hz), 126.21 (d, *J* = 3.5 Hz), 125.84 (d, *J* = 5.1 Hz), 124.11 (d, *J* = 3.6 Hz), 123.95 (d, *J* = 12.1 Hz), 115.70 (d, *J* = 22.1 Hz), 65.00, 20.82. <sup>19</sup>F NMR (376 MHz, CDCl<sub>3</sub>) δ -115.70 – -121.34 (m, 1F).

### (E)-3-(2-Chlorophenyl)allyl acetate (**1j**)<sup>3</sup>

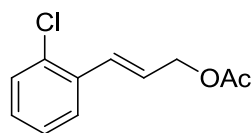

Route for **1j**

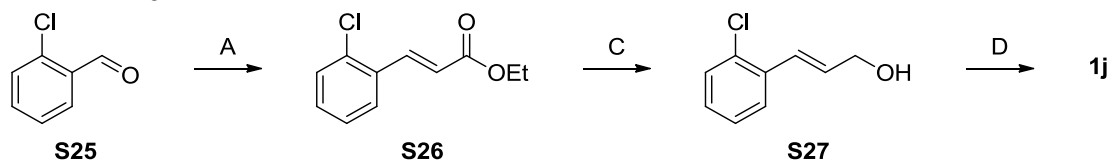

Following general procedure A, the reaction of 2-Chlorobenzaldehyde (**S25**) (2.81 g, 20.0 mmol, 1.0 equiv) with the phosphorane (7.32 g, 21.0 mmol, 1.05 equiv) in CH<sub>2</sub>Cl<sub>2</sub> (30 mL) gave the title compound **S26** (3.79 g, 18.0 mmol, 90%) as a colorless oil that was used without further purification.

Following general procedure C, the reaction of (E)-ethyl 3-(2-Chlorophenyl)acrylate (**S26**) (3.70 g, 17.6 mmol, 1.0 equiv) in anhydrous CH<sub>2</sub>Cl<sub>2</sub> (80 mL) with DIBAL-H (1.0 M in toluene, 39.0 mL, 38.7 mmol, 2.2 equiv) gave the title compound **S27** (2.82 g, 16.7 mmol, 95%) as a colorless oil that was used without further purification.

Following general procedure D, the reaction of (E)-3-(2-Chlorophenyl)prop-2-en-1-ol (**S27**) (2.70 g, 16.0 mmol, 1.0 equiv) in CH<sub>2</sub>Cl<sub>2</sub> (15 mL) with Ac<sub>2</sub>O (3.2 mL, 32.0 mmol, 2.0 equiv) and DMAP (97.7 mg, 0.80 mmol, 0.05 equiv) gave the title compound **1j** (3.03 g, 14.4 mmol, 90%) as a colorless oil.

<sup>1</sup>H NMR (400 MHz, CDCl<sub>3</sub>) δ 7.39 (dd, *J* = 7.1, 2.1 Hz, 1H), 7.26–7.18 (m, 1H), 7.13 – 7.01 (m, 2H), 6.93 (d, *J* = 15.9 Hz, 1H), 6.23–6.07 (m, 1H), 4.64 (d, *J* = 4.5, 1.6 Hz, 2H), 1.99 (s, 3H). <sup>13</sup>C NMR (101 MHz, CDCl<sub>3</sub>) δ 170.38, 134.24, 133.04, 129.59, 129.56, 128.94, 126.86, 126.83, 126.16, 64.64, 20.73.

### (E)-3-(2-Bromophenyl)allyl acetate (**1k**)<sup>3</sup>

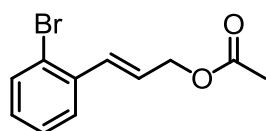

Route for **1k**

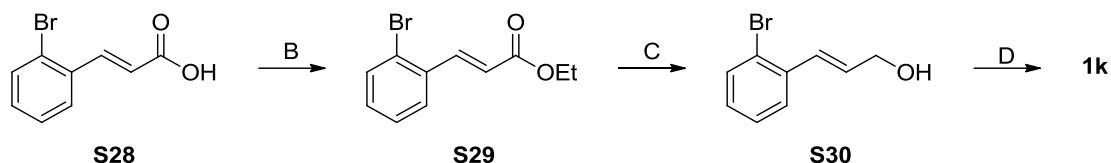

Following general procedure B, the reaction of (E)-3-(2-Bromophenyl)acrylic acid (**S28**) (5.0 g, 22.0 mmol, 1.0 equiv) with conc.  $\text{H}_2\text{SO}_4$  (0.50 mL) in EtOH (50 mL) gave the title compound **S29** (5.0 g, 19.6 mmol, 89%) as a colorless oil that was used without further purification.

Following general procedure C, the reaction of (E)-ethyl 3-(2-Bromophenyl)acrylate (**S29**) (4.80 g, 18.8 mmol, 1.0 equiv) in anhydrous  $\text{CH}_2\text{Cl}_2$  (95 mL) with DIBAL-H (1.0 M in hexane, 41.4 mL, 41.4 mmol, 2.2 equiv) gave the title compound **S30** (4.70 g, 18.4 mmol, 98%) as a colorless oil that was used without further purification.

Following general procedure D, the reaction of (E)-3-(2-Bromophenyl)prop-2-en-1-ol (**S30**) (1.6 g, 7.0 mmol, 1.0 equiv) in  $\text{CH}_2\text{Cl}_2$  (7 mL) with  $\text{Ac}_2\text{O}$  (1.3 mL, 14.0 mmol, 2.0 equiv) and DMAP (43.0 mg, 0.35 mmol, 0.05 equiv) gave the title compound **1k** (1.7 g, 6.7 mmol, 95%) as a colourless oil.

$^1\text{H}$  NMR (400 MHz,  $\text{CDCl}_3$ )  $\delta$  7.54–7.46, (m, 2H), 7.24 (t,  $J$  = 7.6 Hz, 1H), 7.08 (t,  $J$  = 7.6 Hz, 1H), 6.98 (d,  $J$  = 15.9 Hz, 1H), 6.21 (dt,  $J$  = 15.8, 6.2 Hz, 1H), 4.74 (d,  $J$  = 6.2 Hz, 2H), 2.09 (s, 3H).  $^{13}\text{C}$  NMR (101 MHz,  $\text{CDCl}_3$ )  $\delta$  170.60, 136.03, 132.92, 132.34, 129.26, 127.51, 127.13, 126.26, 123.69, 64.68, 20.93.

#### (E)-3-(2-(Trifluoromethyl)phenyl)allyl acetate (**1l**)

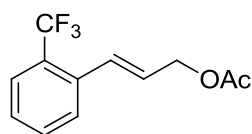

Route for **1l**

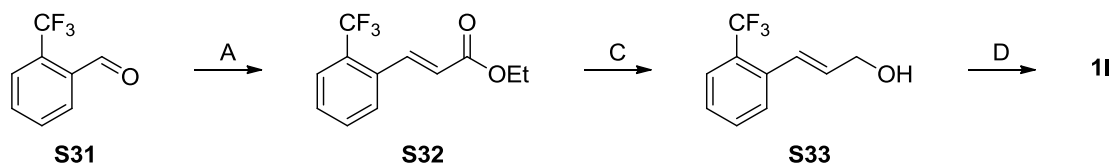

Following general procedure A, the reaction of 2-Trifluoromethylbenzaldehyde (**S31**) (3.48 g, 20.0 mmol, 1.0 equiv) with the phosphorane (7.32 g, 21.0 mmol, 1.05 equiv) in  $\text{CH}_2\text{Cl}_2$  (35 mL) gave the title compound **S32** (4.20 g, 17.2 mmol, 86%) as a white solid that was used without further purification.

Following general procedure C, the reaction of (E)-ethyl-3-(2-(Trifluoromethyl)phen-

yl)acrylate (**S32**) (4.00 g, 16.4 mmol, 1.0 equiv) in anhydrous CH<sub>2</sub>Cl<sub>2</sub> (80 mL) with DIBAL-H (1.0 M in toluene, 33.0 mL, 32.8 mmol, 2.2 equiv) gave the title compound **S33** (2.95 g, 14.6 mmol, 89%) as a white solid that was used without further purification.

Following general procedure D, the reaction of (E)-3-(2-(Trifluoromethyl)phenyl)prop-2-en-1-ol (**S33**) (2.90 g, 14.3 mmol, 1.0 equiv) in CH<sub>2</sub>Cl<sub>2</sub> (13 mL) with Ac<sub>2</sub>O (2.80 mL, 28.6 mmol, 2.0 equiv) and DMAP (88.0 mg, 0.72 mmol, 0.05 equiv) gave the title compound **1l** (3.00 g, 13.4 mmol, 94%) as a colorless oil. **mixture of *cis* and *trans* isomers**

<sup>1</sup>H NMR (400 MHz, CDCl<sub>3</sub>) δ 7.67–7.60 (m, 2H), 7.50 (t, *J* = 7.5 Hz, 1H), 7.36 (t, *J* = 7.6 Hz, 1H), 7.02 (d, *J* = 15.9 Hz, 1H), 6.34–6.03 (m, 1H), 4.76 (d, *J* = 5.9 Hz, 2H), 2.12 (s, 3H). <sup>19</sup>F NMR (376 MHz, CDCl<sub>3</sub>) δ -59.54. HRMS (ESI-TOF) calcd for C<sub>12</sub>H<sub>15</sub>F<sub>3</sub>NO<sub>2</sub> [M+NH<sub>4</sub>]<sup>+</sup>: 262.1049, found: 262.105.

#### (E)-3-(3-Bromophenyl)allyl acetate (**1m**)<sup>4</sup>

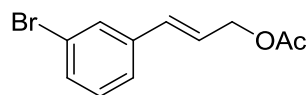

Route for **1m**

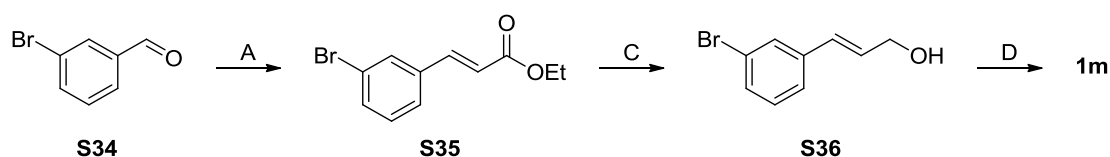

Following general procedure A, the reaction of 3-Bromobenzaldehyde (**S34**) (3.7 g, 20.0 mmol, 1.0 equiv) with the phosphorane (7.32 g, 21.0 mmol, 1.05 equiv) in CH<sub>2</sub>Cl<sub>2</sub> (40 mL) gave the title compound **S35** (4.80 g, 18.8 mmol, 94%) as a colorless oil that was used without further purification.

Following general procedure C, the reaction of (E)-ethyl-3-(3-Bromophenyl)acrylate (**S35**) (4.80 g, 18.8 mmol, 1.0 equiv) in anhydrous CH<sub>2</sub>Cl<sub>2</sub> (100 mL) with DIBAL-H (1.0 M in toluene, 41.4 mL, 41.4 mmol, 2.2 equiv) gave the title compound **S36** (3.2 g, 15.0 mmol, 80%) as a colorless oil that was used without further purification.

Following general procedure D, the reaction of (E)-3-(3-Bromophenyl)prop-2-en-1-ol (**S36**) (3.20 g, 15.0 mmol, 1.0 equiv) in CH<sub>2</sub>Cl<sub>2</sub> (30 mL) with Ac<sub>2</sub>O (2.80 mL, 30.0 mmol, 2.0 equiv) and DMAP (84.0 mg, 0.75 mmol, 0.05 equiv) gave the title compound **1m** (3.67 g, 14.4 mmol, 96%) as a colorless oil.

<sup>1</sup>H NMR (400 MHz, CDCl<sub>3</sub>) δ 7.44 (s, 1H), 7.29 (d, *J* = 7.8 Hz, 1H), 7.19 (d, *J* = 7.6 Hz, 1H), 7.08 (t, *J* = 7.8 Hz, 1H), 6.46 (d, *J* = 15.9 Hz, 1H), 6.19 (dt, *J* = 12.8, 6.1 Hz, 1H), 4.64 (d, *J* = 6.2 Hz, 2H), 2.03 (s, 3H). <sup>13</sup>C NMR (101 MHz, CDCl<sub>3</sub>) δ 170.70, 138.32, 132.28, 130.84, 130.10, 129.40, 125.23, 124.84, 122.74, 64.64, 20.95.

#### (E)-3-(3-Fluoro-4-methoxyphenyl)allyl acetate (**1n**)

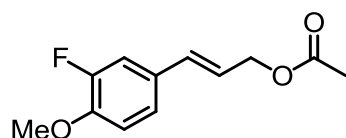

#### Route for **1n**

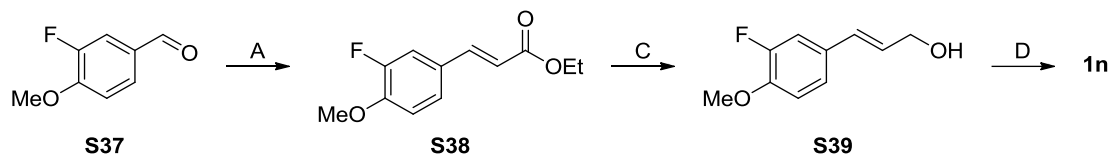

Following general procedure A, the reaction of 3-Fluoro-4-methoxybenzaldehyde (**S37**) (3.1 g, 20.0 mmol, 1.0 equiv) with the phosphorane (7.32 g, 21.0 mmol, 1.05 equiv) in  $\text{CH}_2\text{Cl}_2$  (30 mL) gave the title compound **S38** (4.00 g, 17.83 mmol, 89%) as a white solid that was used without further purification.

Following general procedure C, the reaction of (E)-ethyl-3-(3-Fluoro-4-methoxyphenyl)acrylate (**S38**) (3.95 g, 17.6 mmol, 1.0 equiv) in anhydrous  $\text{CH}_2\text{Cl}_2$  (90 mL) with DIBAL-H (1.2 M in toluene, 32.3 mL, 38.72 mmol, 2.2 equiv) gave the title compound **S39** (3.06 g, 16.8 mmol, 95%) as a colorless oil that was used without further purification.

Following general procedure D, the reaction of (E)-3-(3-Fluoro-4-methoxyphenyl)prop-2-en-1-ol (**S39**) (3.06 g, 16.8 mmol, 1.0 equiv) in  $\text{CH}_2\text{Cl}_2$  (30 mL) with  $\text{Ac}_2\text{O}$  (3.2 mL, 33.6 mmol, 2.0 equiv) and DMAP (94.2 mg, 0.84 mmol, 0.05 equiv) gave the title compound **1n** (3.27 g, 14.6 mmol, 87%) as a colorless oil.

**$^1\text{H}$  NMR** (400 MHz,  $\text{CDCl}_3$ )  $\delta$  7.13 (d,  $J$  = 12.4 Hz, 1H), 7.05 (d,  $J$  = 8.4 Hz, 1H), 6.88 (t,  $J$  = 8.5 Hz, 1H), 6.53 (d,  $J$  = 15.9 Hz, 1H), 6.19–6.05 (m, 1H), 4.68 (d,  $J$  = 6.4 Hz, 2H), 3.86 (s, 3H), 2.08 (s, 3H).  **$^{13}\text{C}$  NMR** (101 MHz,  $\text{CDCl}_3$ )  $\delta$  170.68, 152.26 (d,  $J$  = 245.5 Hz), 147.44 (d,  $J$  = 10.9 Hz), 132.64 (d,  $J$  = 2.2 Hz), 129.55 (d,  $J$  = 6.5 Hz), 123.00 (d,  $J$  = 3.3 Hz), 122.27, 113.44 (d,  $J$  = 18.7 Hz), 113.05 (d,  $J$  = 2.2 Hz), 64.83, 55.98, 20.79.  **$^{19}\text{F}$  NMR** (376 MHz,  $\text{CDCl}_3$ )  $\delta$  -135.24. **HRMS** (EI) calcd for  $\text{C}_{12}\text{H}_{11}\text{O}_3\text{F}$ : 224.0849, found: 224.0852.

#### (E)-3-(2-Bromo-4-methylphenyl)allyl acetate (**1o**)

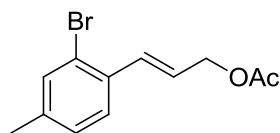

#### Route for **1o**

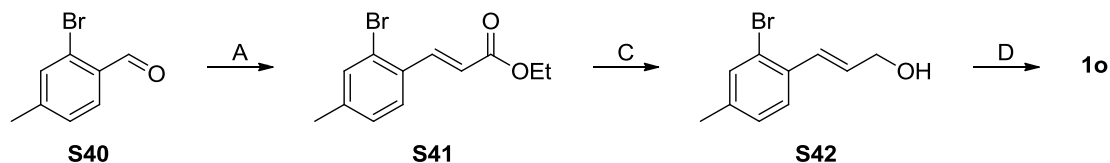

Following general procedure A, the reaction of 2-Bromo-4-methylbenzaldehyde (**S40**) (3.98 g, 20.0 mmol, 1.0 equiv) with the phosphorane (7.32 g, 21.0 mmol, 1.05 equiv)

in CH<sub>2</sub>Cl<sub>2</sub> (40 mL) gave the title compound **S41** (5.22 g, 19.4 mmol, 97%) as a white solid that was used without further purification.

Following general procedure C, the reaction of (E)-ethyl-3-(2-Bromo-4-methylphenyl)acrylate (**S41**) (5.00 g, 18.6 mmol, 1.0 equiv) in anhydrous CH<sub>2</sub>Cl<sub>2</sub> (90 mL) with DIBAL-H (1.0 M in toluene, 41.0 mL, 40.9 mmol, 2.2 equiv) gave the title compound **S42** (4.14 g, 18.2 mmol, 98%) as a colorless oil that was used without further purification.

Following general procedure D, the reaction of (E)-3-(2-Bromo-4-methoxyphenyl)prop-2-en-1-ol (**S42**) (4.10 g, 18.1 mmol, 1.0 equiv) in CH<sub>2</sub>Cl<sub>2</sub> (16 mL) with Ac<sub>2</sub>O (3.5 mL, 36.2 mmol, 2.0 equiv) and DMAP (110.5 mg, 0.91 mmol, 0.05 equiv) gave the title compound **1o** (3.88 g, 14.4 mmol, 80%) as a colorless oil. **mixture of cis and trans isomers**

<sup>1</sup>H NMR (400 MHz, CDCl<sub>3</sub>) δ 7.40 (d, *J* = 8.1 Hz, 1H), 7.37 (s, 1H), 7.11–7.04 (m, 1H), 6.95 (d, *J* = 15.7 Hz, 1H), 6.18 (dt, *J* = 15.8, 6.4 Hz, 1H), 4.74 (d, *J* = 6.3 Hz, 2H), 2.30 (s, 3H), 2.10 (s, 3H). <sup>13</sup>C NMR (101 MHz, CDCl<sub>3</sub>) δ 170.67, 139.58, 133.28, 133.07, 132.39, 128.41, 126.76, 125.13, 123.51, 64.86, 20.95, 20.75. HRMS (ESI-TOF) calcd for C<sub>12</sub>H<sub>17</sub>BrNO<sub>2</sub> [M+NH<sub>4</sub>]<sup>+</sup>: 286.0437, found: 284.0436.

#### (E)-3-(2-Bromo-4-fluorophenyl)allyl acetate (**1p**)

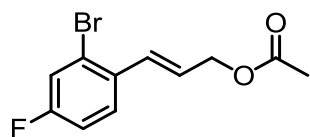

##### Route for **1p**

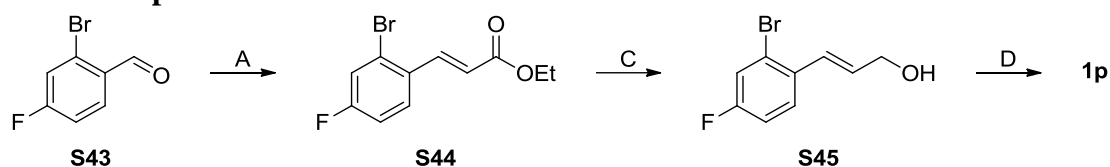

Following general procedure A, the reaction of 2-Bromo-4-fluorobenzaldehyde (**S43**) (4.06 g, 20.0 mmol, 1.0 equiv) with the phosphorane (7.32 g, 21.0 mmol, 1.05 equiv) in CH<sub>2</sub>Cl<sub>2</sub> (40 mL) gave the title compound **S44** (5.30 g, 19.4 mmol, 97%) as a white solid that was used without further purification.

Following general procedure C, the reaction of (E)-ethyl-3-(2-Bromo-4-fluorophenyl)acrylate (**S44**) (5.00 g, 18.3 mmol, 1.0 equiv) in anhydrous CH<sub>2</sub>Cl<sub>2</sub> (90 mL) with DIBAL-H (1.0 M in toluene, 41.0 mL, 40.3 mmol, 2.2 equiv) gave the title compound **S45** (2.80 g, 12.1 mmol, 66%) as a colorless oil that was used without further purification.

Following general procedure D, the reaction of (E)-3-(2-Bromo-4-fluorophenyl)prop-2-en-1-ol (**S45**) (2.70 g, 11.7 mmol, 1.0 equiv) in CH<sub>2</sub>Cl<sub>2</sub> (11 mL) with Ac<sub>2</sub>O (2.3 mL, 23.4 mmol, 2.0 equiv) and DMAP (71.5 mg, 0.59 mmol, 0.05 equiv) gave the title

compound **1p** (2.70 g, 9.9 mmol, 85%) as a white solid.

**<sup>1</sup>H NMR** (400 MHz, CDCl<sub>3</sub>) δ 7.53–7.43 (m, 1H), 7.30 (d, *J* = 8.2 Hz, 1H), 7.01 (t, *J* = 8.3 Hz, 1H), 6.92 (d, *J* = 15.8 Hz, 1H), 6.25–6.10 (m, 1H), 4.75 (d, *J* = 6.2 Hz, 2H), 2.12 (s, 3H). **<sup>13</sup>C NMR** (101 MHz, CDCl<sub>3</sub>) δ 170.74, 161.85 (d, *J* = 251.9 Hz), 132.43, 131.46, 128.10 (d, *J* = 8.4 Hz), 126.05, 123.60 (d, *J* = 9.3 Hz), 120.00 (d, *J* = 24.4 Hz), 114.94 (d, *J* = 21.3 Hz), 64.64, 20.96. **<sup>19</sup>F NMR** (376 MHz, CDCl<sub>3</sub>) δ -112.02. **HRMS** (EI) calcd for C<sub>11</sub>H<sub>10</sub>O<sub>2</sub>FBr: 271.9848, found: 271.9853.

### (E)-3-(2-Bromo-4-methoxyphenyl)allyl acetate (**1q**)

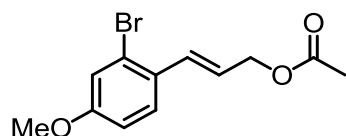

#### Route for **1q**

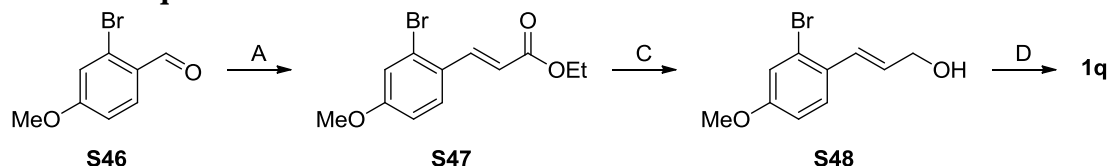

Following general procedure A, the reaction of 2-Bromo-4-methoxybenzaldehyde (**S46**) (4.30 g, 20.0 mmol, 1.0 equiv) with the phosphorane (7.32 g, 21.0 mmol, 1.05 equiv) in CH<sub>2</sub>Cl<sub>2</sub> (45 mL) gave the title compound **S47** (4.73 g, 16.6 mmol, 83%) as a white solid that was used without further purification.

Following general procedure C, the reaction of (E)-ethyl-3-(4-Bromo-2-methoxyphenyl)acrylate (**S47**) (4.70 g, 16.5 mmol, 1.0 equiv) in anhydrous CH<sub>2</sub>Cl<sub>2</sub> (80 mL) with DIBAL-H (1.0 M in toluene, 36.3 mL, 36.3 mmol, 2.2 equiv) gave the title compound **S48** (3.93 g, 16.2 mmol, 98%) as a colorless oil that was used without further purification.

Following general procedure D, the reaction of (E)-3-(2-Bromo-4-methoxyphenyl)prop-2-en-1-ol (**S48**) (3.90 g, 16.0 mmol, 1.0 equiv) in CH<sub>2</sub>Cl<sub>2</sub> (15 mL) with Ac<sub>2</sub>O (3.1 mL, 32.0 mmol, 2.0 equiv) and DMAP (97.7 mg, 0.80 mmol, 0.05 equiv) gave the title compound **1q** (3.97 g, 13.9 mmol, 87%) as a colorless oil. **mixture of *cis* and *trans* isomers**

**<sup>1</sup>H NMR** (400 MHz, CDCl<sub>3</sub>) δ 7.43 (d, *J* = 8.7 Hz, 1H), 7.07 (s, 1H), 6.91 (d, *J* = 15.7 Hz, 1H), 6.82 (d, *J* = 8.7 Hz, 1H), 6.11 (dt, *J* = 15.5, 6.5 Hz, 1H), 4.72 (d, *J* = 6.4 Hz, 1H), 3.78 (s, 3H), 2.09 (s, 3H). **<sup>13</sup>C NMR** (101 MHz, CDCl<sub>3</sub>) δ 170.59, 159.65, 132.05, 128.38, 127.54, 124.08, 123.94, 117.57, 114.03, 64.91, 55.40, 20.88. **HRMS** (EI) calcd for C<sub>12</sub>H<sub>13</sub>O<sub>3</sub>Br: 284.0048, found: 284.0045.

### (E)-3-(4-Bromo-2-methoxyphenyl)allyl acetate (**1r**)

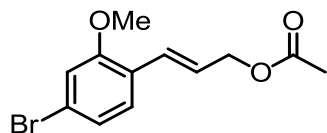

#### Route for **1r**

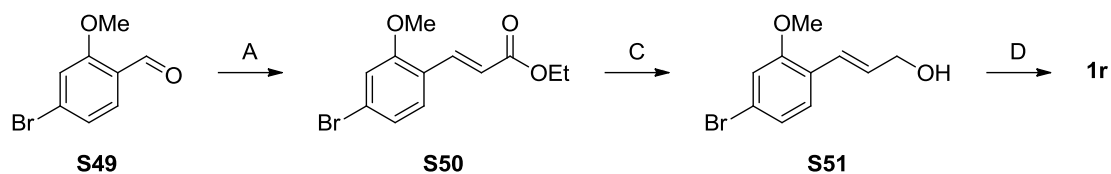

Following general procedure A, the reaction of 4-Bromo-2-methoxybenzaldehyde (**S49**) (4.3 g, 20.0 mmol, 1.0 equiv) with the phosphorane (7.32 g, 21.0 mmol, 1.05 equiv) in  $\text{CH}_2\text{Cl}_2$  (45 mL) gave the title compound **S50** (5.53 g, 19.4 mmol, 97%) as a white solid that was used without further purification.

Following general procedure C, the reaction of (E)-ethyl-3-(4-Bromo-2-methoxyphenyl)acrylate (**S50**) (5.40 g, 18.9 mmol, 1.0 equiv) in anhydrous  $\text{CH}_2\text{Cl}_2$  (95 mL) with DIBAL-H (1.0 M in toluene, 41.6 mL, 41.6 mmol, 2.2 equiv) gave the title compound **S51** (3.08 g, 12.7 mmol, 67%) as a colorless oil that was used without further purification.

Following general procedure D, the reaction of (E)-3-(4-Bromo-2-methoxyphenyl)prop-2-en-1-ol (**S51**) (3.00 g, 12.3 mmol, 1.0 equiv) in  $\text{CH}_2\text{Cl}_2$  (12 mL) with  $\text{Ac}_2\text{O}$  (2.3 mL, 24.6 mmol, 2.0 equiv) and DMAP (75.1 mg, 0.62 mmol, 0.05 equiv) gave the title compound **1r** (3.25 g, 11.4 mmol, 93%) as a white solid. **mixture of *cis* and *trans* isomers**

**$^1\text{H}$  NMR** (400 MHz,  $\text{CDCl}_3$ )  $\delta$  7.47 (d,  $J = 8.1$  Hz, 1H), 6.90 (s, 1H), 6.86 (d,  $J = 8.1$  Hz, 1H), 6.59 (d,  $J = 15.8$  Hz, 1H), 6.39–6.18 (m, 1H), 4.72 (d,  $J = 6.2$  Hz, 2H), 3.91 (s, 3H), 2.11 (s, 3H).  **$^{13}\text{C}$  NMR** (101 MHz,  $\text{CDCl}_3$ )  $\delta$  170.80, 155.88, 136.90, 133.30, 133.18, 124.08, 120.18, 111.30, 109.69, 64.79, 56.14, 20.99. **HRMS** (EI) calcd for  $\text{C}_{12}\text{H}_{13}\text{O}_3\text{Br}$ : 284.0048, found: 284.0056.

#### (E)-3-(Naphthalen-2-yl)allyl acetate (**1s**)<sup>5</sup>

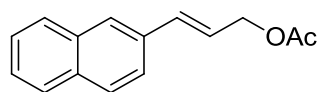

#### Route for **1s**

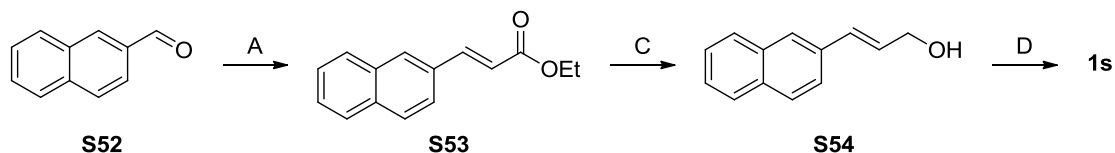

Following general procedure A, the reaction of 2-Naphthaldehyde (**S52**) (3.12 g, 20.0 mmol, 1.0 equiv) with the phosphorane (7.32 g, 21.0 mmol, 1.05 equiv) in  $\text{CH}_2\text{Cl}_2$  (30 mL) gave the title compound **S53** (4.16 g, 18.4 mmol, 92%) as a white solid that was used without further purification.

Following general procedure C, the reaction of (E)-ethyl-3-(Naphthalen-2-yl)acrylate



(**S53**) (4.00 g, 17.7 mmol, 1.0 equiv) in anhydrous CH<sub>2</sub>Cl<sub>2</sub> (90 mL) with DIBAL-H (1.0 M in toluene, 40.0 mL, 38.9 mmol, 2.2 equiv) gave the title compound **S54** (2.90 g, 15.8 mmol, 89%) as a white solid that was used without further purification.

Following general procedure D, the reaction of (E)-3-(Naphthalen-2-yl)prop-2-en-1-ol (**S54**) (2.80 g, 15.2 mmol, 1.0 equiv) in CH<sub>2</sub>Cl<sub>2</sub> (15 mL) with Ac<sub>2</sub>O (3.0 mL, 30.4 mmol, 2.0 equiv) and DMAP (92.8 mg, 0.76 mmol, 0.05 equiv) gave the title compound **1s** (2.92 g, 12.9 mmol, 85%) as a white solid.

<sup>1</sup>H NMR (400 MHz, CDCl<sub>3</sub>) δ 7.85–7.77 (m, 3H), 7.75 (s, 1H), 7.59 (d, *J* = 8.5 Hz, 1H), 7.50–7.40 (m, 2H), 6.81 (d, *J* = 15.9 Hz, 1H), 6.49–6.31 (m, 1H), 4.78 (d, *J* = 6.5 Hz, 2H), 2.12 (s, 3H). <sup>13</sup>C NMR (101 MHz, CDCl<sub>3</sub>) δ 170.89, 134.28, 133.64, 133.48, 133.18, 128.30, 128.06, 127.68, 126.88, 126.36, 126.12, 123.49, 123.46, 65.17, 21.06.

### (E)-3-(Naphthalen-1-yl)allyl acetate (**1t**)

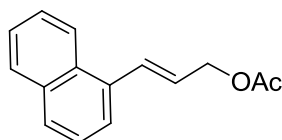

#### Route for **1t**

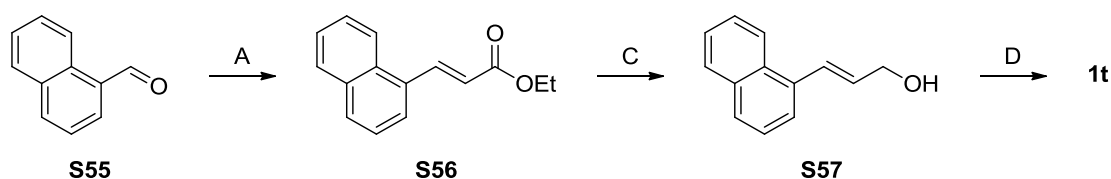

Following general procedure A, the reaction of 2-Naphthaldehyde (**S55**) (3.12 g, 20.0 mmol, 1.0 equiv) with the phosphorane (7.32 g, 21.0 mmol, 1.05 equiv) in CH<sub>2</sub>Cl<sub>2</sub> (30 mL) gave the title compound **S56** (4.07 g, 18.0 mmol, 90%) as a colorless oil that was used without further purification.

Following general procedure C, the reaction of (E)-ethyl-3-(Naphthalen-2-yl)acrylate (**S56**) (4.00 g, 17.7 mmol, 1.0 equiv) in anhydrous CH<sub>2</sub>Cl<sub>2</sub> (90 mL) with DIBAL-H (1.0 M in toluene, 40.0 mL, 38.9 mmol, 2.2 equiv) gave the title compound **S57** (3.10 g, 16.8 mmol, 95%) as a colorless oil that was used without further purification.

Following general procedure D, the reaction of (E)-3-(Naphthalen-2-yl)prop-2-en-1-ol (**S57**) (3.00 g, 16.3 mmol, 1.0 equiv) in CH<sub>2</sub>Cl<sub>2</sub> (15 mL) with Ac<sub>2</sub>O (3.2 mL, 32.6 mmol, 2.0 equiv) and DMAP (99.5 mg, 0.82 mmol, 0.05 equiv) gave the title compound **1t** (3.53 g, 15.6 mmol, 96%) as a colorless oil.

<sup>1</sup>H NMR (400 MHz, CDCl<sub>3</sub>) δ 8.11 (d, *J* = 8.0 Hz, 1H), 7.86 (d, *J* = 7.6 Hz, 1H), 7.81 (d, *J* = 8.2 Hz, 1H), 7.61 (d, *J* = 7.1 Hz, 1H), 7.56–7.48 (m, 2H), 7.48–7.38 (m, 2H), 6.33 (dt, *J* = 15.5, 6.4 Hz, 1H), 4.85 (d, *J* = 6.3 Hz, 2H), 2.15 (s, 3H). <sup>13</sup>C NMR (101 MHz, CDCl<sub>3</sub>) δ 170.75, 133.97, 133.68, 131.25, 131.19, 128.65, 128.47, 126.46, 126.27, 125.93, 125.66, 124.14, 123.73, 65.23, 21.02.

### (E)-3-(Phenanthren-9-yl)allyl acetate (**1u**)

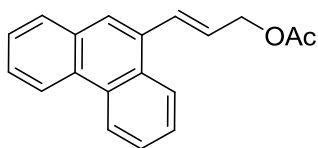

#### Route for **1u**

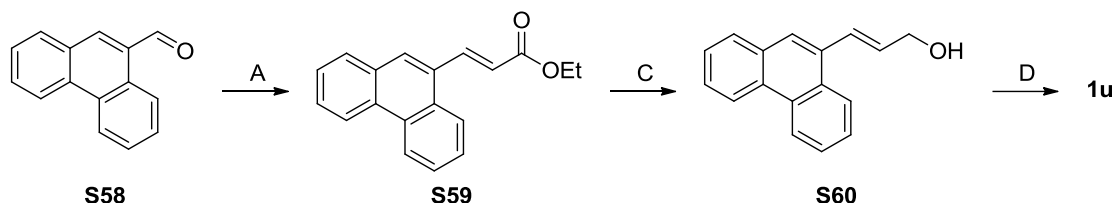

Following general procedure A, the reaction of Phenanthrene-9-carbaldehyde (**S58**) (4.12 g, 20.0 mmol, 1.0 equiv) with the phosphorane (7.32 g, 21.0 mmol, 1.05 equiv) in  $\text{CH}_2\text{Cl}_2$  (40 mL) gave the title compound **S59** (3.98 g, 14.4 mmol, 72%) as a yellow solid that was used without further purification.

Following general procedure C, the reaction of (E)-ethyl-3-(Phenanthren-9-yl)acrylate (**S59**) (3.80 g, 13.7 mmol, 1.0 equiv) in anhydrous  $\text{CH}_2\text{Cl}_2$  (70 mL) with DIBAL-H (1.0 M in toluene, 31.0 mL, 30.1 mmol, 2.2 equiv) gave the title compound **S60** (2.47 g, 10.5 mmol, 77%) as a yellow solid that was used without further purification.

Following general procedure D, the reaction of (E)-3-(Phenanthren-9-yl)prop-2-en-1-ol (**S60**) (2.40 g, 10.2 mmol, 1.0 equiv) in  $\text{CH}_2\text{Cl}_2$  (10 mL) with  $\text{Ac}_2\text{O}$  (2.0 mL, 20.4 mmol, 2.0 equiv) and DMAP (62.3 mg, 0.51 mmol, 0.05 equiv) gave the title compound **1u** (2.21 g, 8.0 mmol, 78%) as a yellow solid.

**$^1\text{H}$  NMR** (400 MHz,  $\text{CDCl}_3$ )  $\delta$  8.71 (d,  $J = 7.6$  Hz, 1H), 8.64 (d,  $J = 8.1$  Hz, 1H), 8.14 (d,  $J = 7.4$  Hz, 1H), 7.89 (d,  $J = 7.5$  Hz, 1H), 7.83 (s, 1H), 7.72–7.56 (m, 4H), 7.40 (d,  $J = 15.5$  Hz, 1H), 6.40 (dt,  $J = 15.5, 6.3$  Hz, 1H), 4.89 (d,  $J = 6.3$  Hz, 1H), 2.19 (s, 3H).  **$^{13}\text{C}$  NMR** (101 MHz,  $\text{CDCl}_3$ )  $\delta$  170.92, 132.97, 131.87, 131.65, 130.41, 130.33, 128.73, 126.83, 126.73, 126.61, 125.18, 124.56, 123.12, 122.55, 65.19, 21.13. **HRMS** (EI) calcd for  $\text{C}_{19}\text{H}_{16}\text{O}_2$ : 276.1150, found: 276.1156.

### General scheme 2 for the synthesis of **3a-3e**<sup>6</sup>

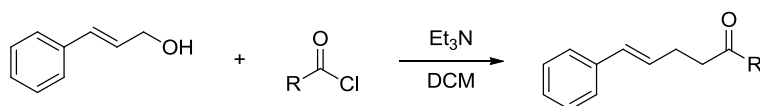

#### General procedure E:

To a stirred solution of cinnamyl alcohol (1.0 equiv) in anhydrous  $\text{CH}_2\text{Cl}_2$  (3 mL/mmol) was added triethylamine (3.0 equiv) and acetyl chloride derivative (1.1 equiv) at 0 °C. The mixture was stirred for 30 min and then allowed to warm to room temperature and stirred overnight. The mixture was quenched with  $\text{NH}_4\text{Cl}$  (aq) and extracted with  $\text{CH}_2\text{Cl}_2$  (3 equal volume). The combine organic layers was washed with brine, dried

over  $\text{MgSO}_4$ , and the solution was removed under vacuum and the crude residue was purified by chromatography on  $\text{SiO}_2$  with hexane/EtOAc to afford corresponding product **3a**<sup>7</sup>, **3b**<sup>6</sup>, **3c**<sup>8</sup>, **3d**<sup>9</sup>, **3e**<sup>10</sup>.

#### Cinnamyl isobutyrate (**3a**)

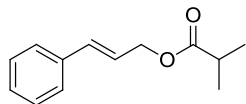

**$^1\text{H}$  NMR** (400 MHz,  $\text{CDCl}_3$ )  $\delta$  7.39 (d,  $J = 7.1$  Hz, 2H), 7.32 (t,  $J = 7.4$  Hz, 2H), 7.25 (t,  $J = 7.2$  Hz, 1H), 6.64 (d,  $J = 15.9$  Hz, 1H), 6.29 (dt,  $J = 15.9, 6.4$  Hz, 1H), 4.73 (d,  $J = 7.6$  Hz, 2H), 2.78–2.34 (m, 1H), 1.22 (d,  $J = 7.0$  Hz, 6H).  **$^{13}\text{C}$  NMR** (101 MHz,  $\text{CDCl}_3$ )  $\delta$  176.78, 136.28, 133.88, 128.60, 128.02, 126.61, 123.43, 64.86, 34.03, 19.03.

#### Cinnamyl pivalate (**3b**)

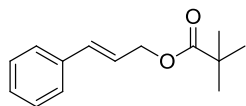

**$^1\text{H}$  NMR** (400 MHz,  $\text{CDCl}_3$ )  $\delta$  7.38 (d, 7.0 Hz, 2H), 7.33 – 7.27 (m, 2H), 7.26 – 7.20 (m, 1H), 6.63 (d,  $J = 15.9$  Hz, 1H), 6.39 – 6.17 (m, 1H), 4.72 (d,  $J = 6.2$  Hz, 2H), 1.27 (s, 9H).  **$^{13}\text{C}$  NMR** (101 MHz,  $\text{CDCl}_3$ )  $\delta$  178.00, 136.33, 133.6 (s), 128.60, 127.99, 126.62, 123.55, 64.89, 38.78, 27.26.

#### Cinnamyl 2-methoxyacetate (**3c**)

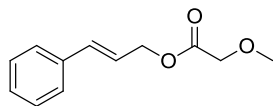

**$^1\text{H}$  NMR** (400 MHz,  $\text{CDCl}_3$ )  $\delta$  7.27 (d,  $J = 7.1$  Hz, 2H), 7.20 (t,  $J = 6.7$  Hz, 2H), 7.16 – 7.11 (m, 1H), 6.53 (d,  $J = 15.8$  Hz, 1H), 6.25 – 6.10 (m, 1H), 4.68 (d,  $J = 6.1$  Hz, 2H), 3.93 (s, 2H), 3.31 (s, 3H).  **$^{13}\text{C}$  NMR** (101 MHz,  $\text{CDCl}_3$ )  $\delta$  169.97, 135.98, 134.54, 128.56, 128.11, 126.59, 122.61, 69.56, 65.19, 59.11.

#### Cinnamyl 4-methoxybenzoate (**3d**)

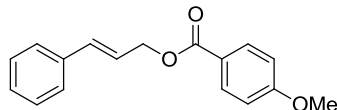

**$^1\text{H}$  NMR** (400 MHz,  $\text{CDCl}_3$ )  $\delta$  8.07 (d,  $J = 8.7$  Hz, 2H), 7.43 (d,  $J = 7.1$  Hz, 2H), 7.34 (t,  $J = 7.4$  Hz, 2H), 7.27 (t,  $J = 6.6$  Hz, 1H), 7.02 – 6.88 (m, 2H), 6.74 (d,  $J = 15.9$  Hz, 1H), 6.42 (dt,  $J = 15.9, 6.3$  Hz, 1H), 4.97 (d,  $J = 6.3$  Hz, 2H), 3.84 (s, 3H).  **$^{13}\text{C}$  NMR** (101 MHz,  $\text{CDCl}_3$ )  $\delta$  166.12, 163.42, 136.30, 134.00, 131.72, 128.64, 128.06, 126.66, 123.56, 122.60, 113.65, 65.27, 55.41.

#### Cinnamyl benzoate (**3e**)

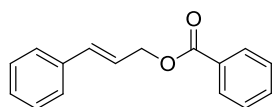

**<sup>1</sup>H NMR** (400 MHz, CDCl<sub>3</sub>) δ 8.14 (d, *J* = 8.3 Hz, 2H), 7.59 (t, *J* = 7.4 Hz, 1H), 7.51 – 7.42 (m, 4H), 7.36 (t, *J* = 7.5 Hz, 2H), 7.30 (t, *J* = 7.2 Hz, 1H), 6.77 (d, *J* = 15.9 Hz, 1H), 6.44 (dt, *J* = 15.9, 6.4 Hz, 1H), 5.02 (d, *J* = 6.4 Hz, 2H). **<sup>13</sup>C NMR** (101 MHz, CDCl<sub>3</sub>) δ 166.40, 136.25, 134.29, 133.05, 130.24, 129.71, 128.67, 128.43, 128.14, 126.70, 123.29, 65.58.

### General scheme 3 for the synthesis of **3f**, **3g**<sup>6,11</sup>

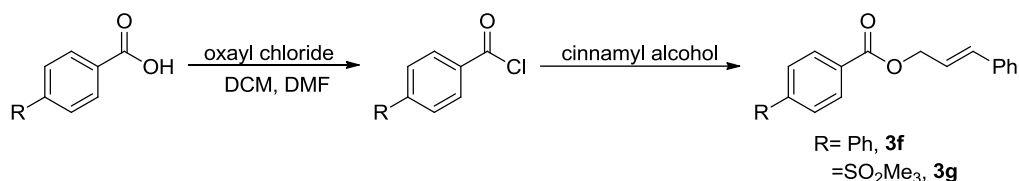

#### General procedure F:

To a stirred solution of benzoic acid derivative (1.0 equiv) in anhydrous CH<sub>2</sub>Cl<sub>2</sub> (3 mL/mmol) was added dropwise oxalyl chloride (1.5 equiv) and drops of DMF at 0 °C for 30 min. Then the mixture was stirred at room temperature until no gas releasing and evaporated to afford the crude product without further purification.

To a stirred solution of acetyl chloride derivative (1.0 equiv) in anhydrous CH<sub>2</sub>Cl<sub>2</sub> (3 mL/mmol) was added triethylamine (3.0 equiv) cinnamyl alcohol (0.9 equiv) at 0 °C. The mixture was stirred for 30 min and then allowed to warm to room temperature and stirred overnight. The mixture was quenched with NH<sub>4</sub>Cl (aq) and extracted with CH<sub>2</sub>Cl<sub>2</sub> (3 equal volume). The combine organic layers was washed with brine, dried over MgSO<sub>4</sub>, and the solution was removed under vacuum and the crude residue was purified by chromatography on SiO<sub>2</sub> with hexane/EtOAc to afford corresponding product **3f-3g**<sup>12</sup>.

#### Cinnamyl [1,1'-biphenyl]-4-carboxylate (**3f**)

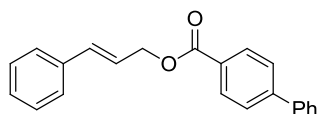

**<sup>1</sup>H NMR** (400 MHz, CDCl<sub>3</sub>) δ 8.17 (d, *J* = 8.4 Hz, 2H), 7.68 (d, *J* = 8.4 Hz, 2H), 7.64 (d, *J* = 7.3 Hz, 2H), 7.52 – 7.38 (m, 5H), 7.35 (t, *J* = 7.4 Hz, 2H), 7.31 – 7.25 (m, 1H), 6.77 (d, *J* = 15.9 Hz, 1H), 6.44 (dt, *J* = 15.9, 6.4 Hz, 1H), 5.02 (d, *J* = 6.4 Hz, 2H). **<sup>13</sup>C NMR** (101 MHz, CDCl<sub>3</sub>) δ 166.29, 145.72, 139.98, 136.22, 134.29, 130.20, 128.93, 128.63, 128.16, 128.11, 127.29, 127.07, 126.66, 123.28, 65.58.

#### Cinnamyl 4-(methylsulfonyl)benzoate (**3g**)

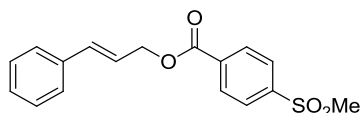

**<sup>1</sup>H NMR** (400 MHz, CDCl<sub>3</sub>) δ 8.25 (d, *J* = 8.3 Hz, 2H), 8.02 (d, *J* = 8.4 Hz, 2H), 7.41 (d, *J* = 7.3 Hz, 2H), 7.33 (t, *J* = 7.4 Hz, 2H), 7.26 (t, *J* = 7.2 Hz, 1H), 6.75 (d, *J* = 15.9 Hz, 1H), 6.39 (dt, *J* = 15.8, 6.5 Hz, 1H), 5.01 (d, *J* = 6.4 Hz, 2H), 3.07 (s, 3H). **<sup>13</sup>C NMR** (101 MHz, CDCl<sub>3</sub>) δ 164.73, 144.31, 135.94, 135.11, 134.95, 130.60, 128.67, 128.31, 127.50, 126.69, 122.45, 66.36, 44.28.

## 4 Conditions Screening of the Reaction

| 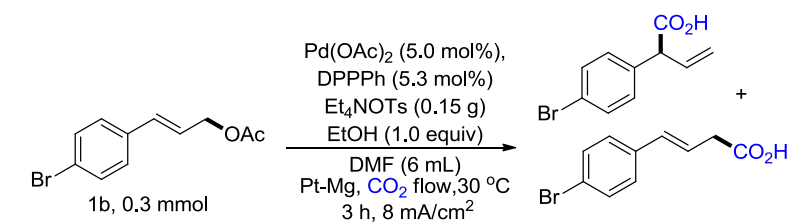 |                                                                |                     |                  |
|------------------------------------------------------------------------------------|----------------------------------------------------------------|---------------------|------------------|
| Entry <sup>a</sup>                                                                 | deviation from above conditions                                | Yield% <sup>b</sup> | B:L <sup>c</sup> |
| 1                                                                                  | none                                                           | 85(81) <sup>d</sup> | 20:1             |
| 2                                                                                  | no Pd(OAc) <sub>2</sub>                                        | 19                  | 2:1              |
| 3                                                                                  | Pd(PPh <sub>3</sub> ) <sub>2</sub> Cl <sub>2</sub> as catalyst | 20                  | 3:1              |
| 4                                                                                  | Pd <sub>2</sub> (dba) <sub>3</sub> as catalyst                 | 19                  | 3:1              |
| 5                                                                                  | Pd(COCF <sub>3</sub> ) <sub>2</sub> as catalyst                | 24                  | 5:1              |
| 6                                                                                  | [Pd(allyl)Cl] <sub>2</sub> as catalyst                         | 22                  | 4:1              |
| 7                                                                                  | no EtOH                                                        | 21                  | 2:1              |
| 8                                                                                  | 0.5 eq. EtOH                                                   | 56                  | 14:1             |
| 9                                                                                  | 2 eq. EtOH                                                     | 40                  | 14:1             |
| 10                                                                                 | 5 eq. EtOH                                                     | 60                  | 11:1             |
| 11                                                                                 | 10 eq. EtOH                                                    | 28                  | 3:1              |
| 12                                                                                 | 30 eq. EtOH                                                    | 50                  | 3:1              |
| 13                                                                                 | 1.0 eq. CH <sub>3</sub> OH                                     | 37                  | 19:1             |
| 14                                                                                 | 1.0 eq. <sup>n</sup> PrOH                                      | 40                  | 14:1             |
| 15                                                                                 | 1.0 eq. <sup>i</sup> PrOH                                      | 57                  | 13:1             |
| 16                                                                                 | 1.0 eq. <sup>t</sup> BuOH                                      | 45                  | 11:1             |
| 17                                                                                 | 1.0 eq. C <sub>8</sub> H <sub>17</sub> OH                      | 38                  | 9:1              |
| 18                                                                                 | no DPPPh                                                       | 38                  | 3:1              |
| 19                                                                                 | PPh <sub>3</sub> as ligand                                     | 35                  | 2:1              |
| 20                                                                                 | DPPE as ligand                                                 | 70                  | 15:1             |
| 21                                                                                 | DPPP as ligand                                                 | 65                  | 18:1             |
| 22                                                                                 | DPPB as ligand                                                 | 50                  | 6:1              |
| 23                                                                                 | DPPCyE as ligand                                               | 75                  | 8:1              |
| 24                                                                                 | 0 °C                                                           | 29                  | 6:1              |
| 25                                                                                 | 10 °C                                                          | 80                  | 20:1             |
| 26                                                                                 | rt. (22 °C)                                                    | 86                  | 12:1             |
| 27                                                                                 | 40 °C                                                          | 45                  | 8:1              |
| 28                                                                                 | 50 °C                                                          | 43                  | 4:1              |
| 29                                                                                 | no electric current                                            | -                   | NP               |
| 30                                                                                 | Mn or Zn in lieu of electric current                           | -                   | NP               |
| 31                                                                                 | <sup>n</sup> Bu <sub>4</sub> NBF <sub>4</sub> as electrolyte   | 58                  | 3:1              |
| 32                                                                                 | <sup>n</sup> Bu <sub>4</sub> PF <sub>6</sub> as electrolyte    | 18                  | -                |

<sup>a</sup> Reaction conditions: 1b (0.3 mmol), Pd(OAc)<sub>2</sub> (5 mol%), DPPPh (5.3 mol%), Et<sub>4</sub>NOTs (0.15 g) and EtOH (1.0 equiv), DMF (6 mL) in an undivided cell with a platinum electrode and magnesium rod as sacrificial anode. <sup>b</sup> The yield was determined by <sup>1</sup>H-NMR with CH<sub>2</sub>Br<sub>2</sub> as the internal standard. <sup>c</sup> The ratio of BL products was determined by <sup>1</sup>H-NMR. <sup>d</sup> Isolated yield.

Note: 1) The reason for choosing alcohol as additive is that the alcohol may be useful for the activation of CO<sub>2</sub>.<sup>13</sup> When the additive was ethanol, the crude <sup>1</sup>H NMR was

much cleaner and the yield was significantly increased.

2) When no ligand or simple  $\text{PPh}_3$  was employed as the ligand, after the electrolysis, the platinum cathode was covered by a black precipitation. This may arise from the palladium catalyst deactivation.

## 5 Photographic Guide for Electrochemical Carboxylation

### *1 Easily hand-made electrochemical cell*

#### **Step 0. Overview of materials used.**

From left to right: 1) The magnesium rod attached to a copper wire. 2) The platinum cathode 3) The rubber stopper pierced with two hypodermic needles. 4) A 10 mL hydrogenation tube.

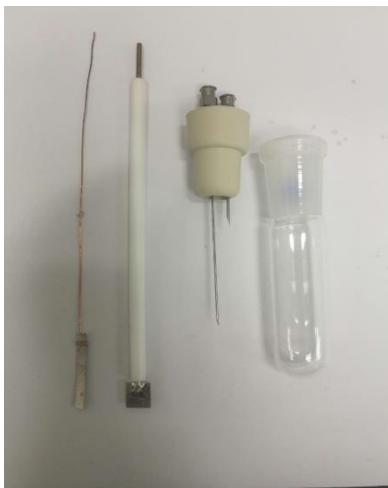

#### **Step 1. Preparation of the sacrificial magnesium rod anode**

Cut a magnesium rod about 3 cm with a scissors.

Strip the protective skin of the copper wire with a tweezer.

Wrap the magnesium with copper wire.

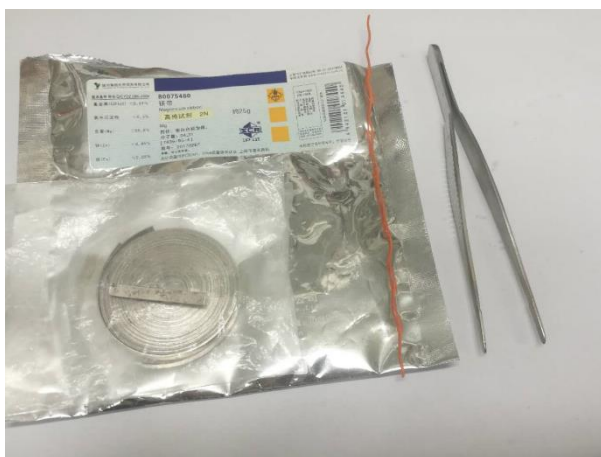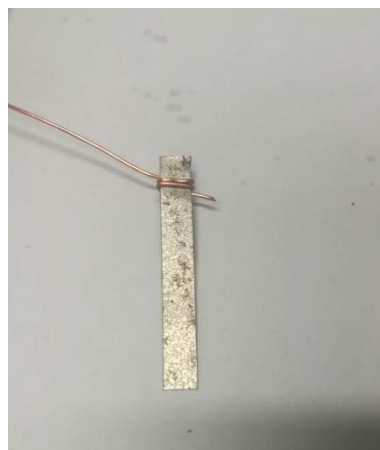

#### **Step 2. Assembly of the cell**

Pierce the rubber stopper with the platinum cathode.

The magnesium rod and stopper were fitted into the tube.

Note: the copper wire is not supposed to be immersed the reaction. (the black line on the tube, 6 mL)



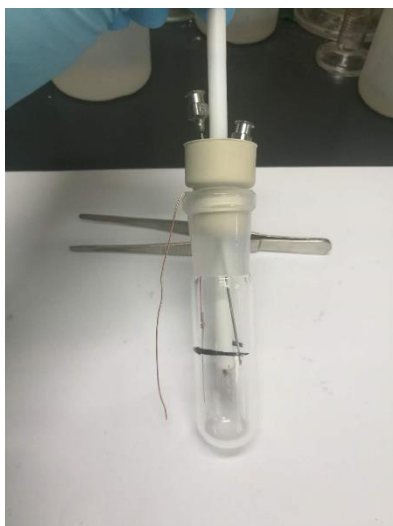

## 2 Graphical Guide for Electrochemical carboxylation

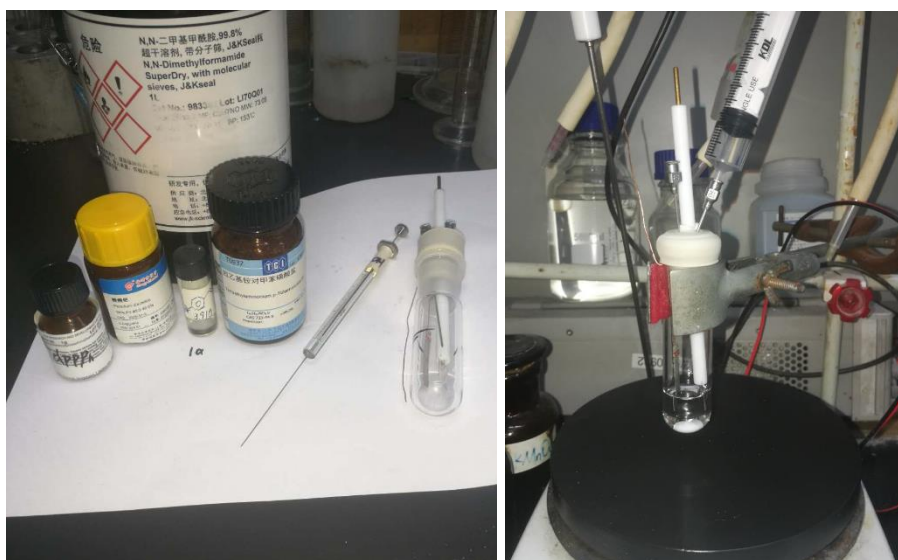

**Left** materials used in the reaction.

**Right** the electrolyte weighted in glovebox was dissolved in DMF (SuperDry) and injected into the tube charged with a stir bar with a 10.0mL disposable syringe.

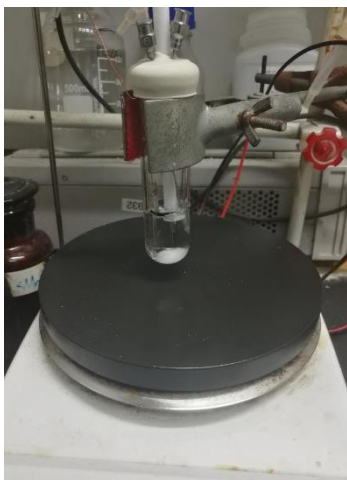

**Left** Bubbling CO<sub>2</sub> for 30 mins.

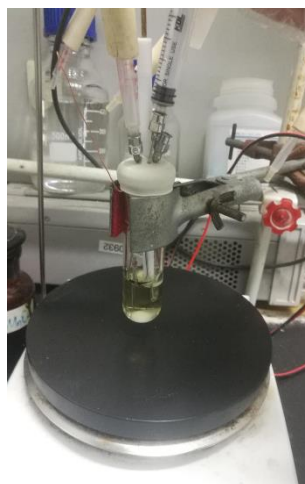

**Right** injected the catalysts, EtOH, SM.

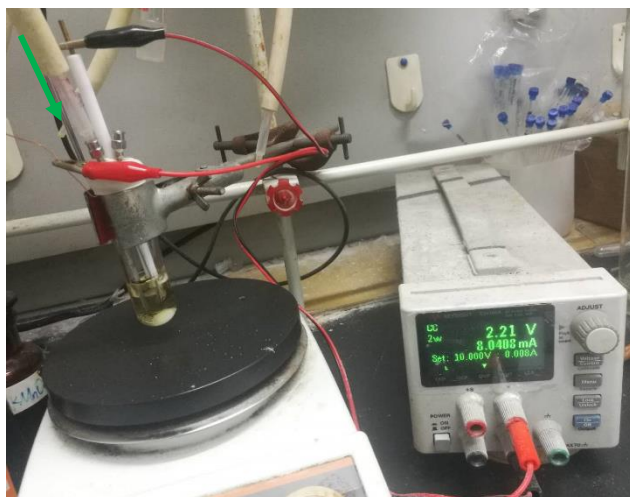

Attached to electrode (the red (+) to the magnesium, the black (-) to the platinum).  
 Conducted constant current electrolysis ( $I = 8.0 \text{ mA}$ ) using an potentiostat.(E36105A, KEYSIGHT) under continuous bubbling CO<sub>2</sub>.(green line)

## 6 General Procedure for the Electrolysis

A 10 mL hydrogenation tube charged with a stir bar was installed a platinum electrode (1.0 x 1.0 cm<sup>2</sup>) as cathode and magnesium rod as sacrificial anode. The electrolyte was dissolved in DMF (6.0 mL, superDry) and was injected into the tube with a 10 mL syringe. After bubbling of CO<sub>2</sub> gas (dried over conc. H<sub>2</sub>SO<sub>4</sub>) into the electrolytes for 30 min, Pd(OAc)<sub>2</sub> (0.015 mmol, 3.4 mg, 5 mol%), DPPPh (0.016 mmol, 7.2 mg, 5.3 mol%), allyl ester (0.3 mmol, 1.0 equiv), and EtOH (0.3 mmol, 17.5  $\mu$ L, 1.0 equiv) were added to the tube. Under continuous bubbling of CO<sub>2</sub> gas, the reaction mixture was electrolyzed under a constant current of 8 mA until the complete consumption of the starting materials as judged by TLC (about 3 hours). After that, the reaction mixture was transferred to a 50 mL erlenmeyer flask and acidized with HCl (1 N). The aqueous layer extracted with EtOAc (3 x equal volume) and the combined organics were washed with sat. NH<sub>4</sub>Cl (4 x equal volume), dried over MgSO<sub>4</sub>, filtered, and concentrated *in vacuo*. The crude product was purified by column chromatography to furnish the desired product.

### Characterization Data for the Products

#### 2-(4-Bromophenyl)but-3-enoic acid (**2a**)<sup>14</sup>

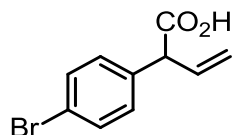

According to the procedure, (E)-3-(4-Bromophenyl)allyl acetate (**1a**) was electrolyzed for 3h. The product was purified by flash column chromatography on silica to afford **2a** (58.6 mg, 81% yield) as a colorless oil.

<sup>1</sup>H NMR (400 MHz, CDCl<sub>3</sub>)  $\delta$  7.47 (d, *J* = 8.4 Hz, 2H), 7.20 (d, *J* = 8.4 Hz, 2H), 6.25–6.07 (m, 1H), 5.28 (t, *J* = 7.9 Hz, 1H), 5.19 (d, *J* = 17.1 Hz, 1H), 4.29 (d, *J* = 7.8 Hz, 1H). <sup>13</sup>C NMR (101 MHz, CDCl<sub>3</sub>)  $\delta$  178.17, 136.22, 134.31, 131.89, 129.87, 121.73, 118.61, 54.84. HRMS (EI) calcd for C<sub>10</sub>H<sub>9</sub>O<sub>2</sub>Br: 239.9786, found: 239.9794.

#### 2-Phenylbut-3-enoic acid (**2b**)<sup>15</sup>

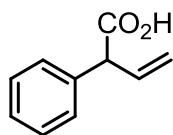

According to the procedure, cinnamyl acetate (**1b**) was electrolyzed for 3h. The product was purified by flash column chromatography on silica to afford **2b** (28.2 mg, 58% yield) as a pale-yellow oil.

<sup>1</sup>H NMR (400 MHz, CDCl<sub>3</sub>)  $\delta$  7.45–7.27 (m, 5H), 6.38–6.17 (m, 1H), 5.28 (d, *J* = 10.2 Hz, 1H), 5.23 (d, *J* = 17.1 Hz, 1H), 4.37 (d, *J* = 8.0 Hz, 1H). <sup>13</sup>C NMR (101 MHz,

CDCl<sub>3</sub>)  $\delta$  178.80, 137.37, 134.97, 128.83, 128.12, 127.65, 118.13, 55.59. **HRMS** (ESI-TOF) calcd for C<sub>10</sub>H<sub>11</sub>O<sub>2</sub> [M+H]<sup>+</sup>: 163.0754, found: 163.0754.

### 2-(p-Tolyl)but-3-enoic acid (**2c**)<sup>14</sup>

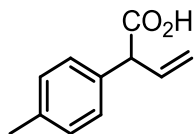

According to the procedure, (E)-3-(p-Tolyl)allyl acetate (**1c**) was electrolyzed for 3h. The product was purified by flash column chromatography on silica to afford **2c** (35.0 mg, 65% yield) as a white solid.

**<sup>1</sup>H NMR** (400 MHz, CDCl<sub>3</sub>)  $\delta$  7.21 (d, *J* = 8.0 Hz, 1H), 7.15 (d, *J* = 7.9 Hz, 1H), 6.28–6.12 (m, 1H), 5.23 (d, *J* = 10.2 Hz, 1H), 5.17 (d, *J* = 17.7 Hz, 1H), 4.29 (d, *J* = 8.0 Hz, 1H), 2.33 (s, 1H). **<sup>13</sup>C NMR** (101 MHz, CDCl<sub>3</sub>)  $\delta$  178.79, 137.33, 135.10, 134.38, 129.47, 127.92, 117.85, 55.11, 21.05. **HRMS** (ESI-TOF) calcd for C<sub>11</sub>H<sub>13</sub>O<sub>2</sub> [M+H]<sup>+</sup>: 177.0910, found: 177.0910.

### 2-(4-Methoxyphenyl)but-3-enoic acid (**2d**)<sup>14</sup>

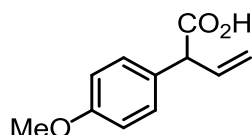

According to the procedure, (E)-3-(4-Methoxyphenyl)allyl acetate (**1d**) was electrolyzed for 3h. The product was purified by flash column chromatography on silica to afford **2d** (36.0 mg, 62% yield) as a pale-yellow oil.

**<sup>1</sup>H NMR** (400 MHz, CDCl<sub>3</sub>)  $\delta$  7.24 (d, *J* = 8.7 Hz, 1H), 6.88 (d, *J* = 8.6 Hz, 1H), 6.31–6.09 (m, 1H), 5.23 (d, *J* = 10.2 Hz, 1H), 5.17 (d, *J* = 17.1 Hz, 1H), 4.28 (d, *J* = 7.9 Hz, 1H), 3.80 (s, 1H). **<sup>13</sup>C NMR** (101 MHz, CDCl<sub>3</sub>)  $\delta$  178.71, 158.99, 135.16, 129.43, 129.16, 117.79, 114.17, 55.28, 54.63. **HRMS** (ESI-TOF) calcd for C<sub>11</sub>H<sub>13</sub>O<sub>3</sub> [M+H]<sup>+</sup>: 193.0859, found: 193.0860.

### 2-(4-(tert-Butyl)phenyl)but-3-enoic acid (**2e**)

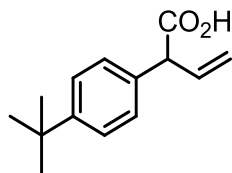

According to the procedure, (E)-3-(4-Methoxyphenyl)allyl acetate (**1d**) was electrolyzed for 3h. The product was purified by flash column chromatography on silica to afford **2d** (52.4 mg, 80% yield) as a yellowish solid.

**<sup>1</sup>H NMR** (400 MHz, CDCl<sub>3</sub>)  $\delta$  7.39 (d, *J* = 8.3 Hz, 2H), 7.29 (d, *J* = 8.3 Hz, 2H), 6.31–6.15 (m, 1H), 5.31–5.18 (m, 2H), 4.33 (d, *J* = 8.2 Hz, 1H), 1.34 (s, 9H). **<sup>13</sup>C NMR** (101 MHz, CDCl<sub>3</sub>)  $\delta$  179.00, 150.51, 135.10, 134.32, 127.67, 125.75, 117.88, 55.18,

34.50, 31.33. **HRMS** (ESI-TOF) calcd for C<sub>14</sub>H<sub>19</sub>O<sub>2</sub> [M+H]<sup>+</sup>: 219.1380, found: 219.1381.

**IR** (neat): 3084, 2963, 2929, 2869, 1698, 1639, 1287, 929, 822, 711 cm<sup>-1</sup>.

#### 2-(4-Fluorophenyl)but-3-enoic acid (**2f**)<sup>14</sup>

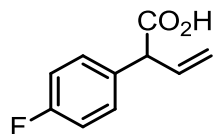

According to the procedure, (E)-3-(4-Fluorophenyl)allyl acetate (**1f**) was electrolyzed for 3h. The product was purified by flash column chromatography on silica to afford **2f** (42.8 mg, 78% yield) as a yellow oil.

**<sup>1</sup>H NMR** (400 MHz, CDCl<sub>3</sub>) δ 7.31–7.28 (m, 2H), 7.04 (t, *J* = 8.6 Hz, 2H), 6.30–6.09 (m, 1H), 5.27 (d, *J* = 10.1 Hz, 1H), 5.19 (d, *J* = 17.1 Hz, 1H), 4.32 (d, *J* = 7.8 Hz, 1H).

**<sup>13</sup>C NMR** (101 MHz, CDCl<sub>3</sub>) δ 178.56, 162.21 (d, *J* = 246.4 Hz), 134.69, 132.98 (d, *J* = 3.3 Hz), 129.76 (d, *J* = 8.1 Hz), 118.31, 115.66 (d, *J* = 21.5 Hz), 54.65. **<sup>19</sup>F NMR** (376 MHz, CDCl<sub>3</sub>) δ -114.77. **HRMS** (EI) calcd for C<sub>10</sub>H<sub>9</sub>O<sub>2</sub>F: 180.0587, found: 180.0588.

#### 2-(4-(Trifluoromethyl)phenyl)but-3-enoic acid (**2g**)

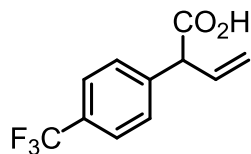

According to the procedure, (E)-3-(4-(Trifluoromethyl)phenyl)allyl acetate (**1g**) was electrolyzed for 3h. The product was purified by flash column chromatography on silica to afford **2g** (43.0 mg, 62% yield) as a yellowish oil.

**<sup>1</sup>H NMR** (400 MHz, CDCl<sub>3</sub>) δ 7.61 (d, *J* = 8.2 Hz, 2H), 7.45 (d, *J* = 8.1 Hz, 2H), 6.24–6.14 (m, 1H), 5.31 (d, *J* = 10.2 Hz, 1H), 5.21 (d, *J* = 17.1 Hz, 1H), 4.40 (d, *J* = 7.9 Hz, 1H). **<sup>13</sup>C NMR** (101 MHz, CDCl<sub>3</sub>) δ 177.75, 141.09, 134.01, 129.95 (q, *J* = 32.5 Hz), 128.56, 125.70 (q, *J* = 7.3, 3.6 Hz), 123.95 (q, *J* = 272.7 Hz), 118.95, 55.17. **<sup>19</sup>F NMR** (376 MHz, CDCl<sub>3</sub>) δ -62.67. **HRMS** (EI) calcd for C<sub>11</sub>H<sub>9</sub>O<sub>2</sub>F<sub>3</sub>: 230.0555, found: 230.0557.

**IR** (neat): 3088, 3021, 2925, 1708, 1640, 1322, 1164, 1121, 1067, 834 cm<sup>-1</sup>.

#### 2-(4-Chlorophenyl)but-3-enoic acid (**2h**)<sup>14</sup>

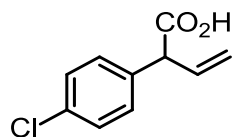

According to the procedure, (E)-3-(4-Chlorophenyl)allyl acetate (**1h**) was electrolyzed for 3h. The product was purified by flash column chromatography on silica to afford **2h** (51.0 mg, 87% yield) as a white solid.

**<sup>1</sup>H NMR** (400 MHz, CDCl<sub>3</sub>) δ 7.33 (d, *J* = 8.5 Hz, 2H), 7.26 (d, *J* = 8.5 Hz, 2H), 6.23–6.12 (m, 1H), 5.28 (d, *J* = 10.2 Hz, 1H), 5.19 (d, *J* = 17.1 Hz, 1H), 4.31 (d, *J* = 7.9

Hz, 1H). **<sup>13</sup>C NMR** (101 MHz, CDCl<sub>3</sub>) δ 178.39, 135.70, 134.40, 133.61, 129.52, 128.94, 118.56, 54.80. **HRMS** (EI) calcd for C<sub>10</sub>H<sub>9</sub>O<sub>2</sub>Cl: 196.0291, found: 196.0289.

### 2-(2-Fluorophenyl)but-3-enoic acid (**2i**)

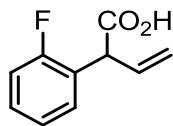

According to the procedure, (E)-3-(2-Fluorophenyl)allyl acetate (**1i**) was electrolyzed for 3h. The product was purified by flash column chromatography on silica to afford **2i** (49.0 mg, 91% yield) as a yellow oil.

**<sup>1</sup>H NMR** (400 MHz, CDCl<sub>3</sub>) δ 7.37–7.26 (m, 2H), 7.19–7.01 (m, 2H), 6.25–6.17 (m, 1H), 5.29 (d, *J* = 10.2 Hz, 1H), 5.20 (d, *J* = 17.1 Hz, 1H), 4.65 (d, *J* = 7.6 Hz, 1H). **<sup>13</sup>C NMR** (101 MHz, CDCl<sub>3</sub>) δ 178.03, 160.31 (d, *J* = 247.1 Hz), 133.43, 129.72 (d, *J* = 3.7 Hz), 129.32 (d, *J* = 8.3 Hz), 124.62 (d, *J* = 14.8 Hz), 124.36 (d, *J* = 3.6 Hz), 118.73, 115.63 (d, *J* = 22.0 Hz), 48.46. **<sup>19</sup>F NMR** (376 MHz, CDCl<sub>3</sub>) δ -117.05–117.13 (m, 3F). **HRMS** (ESI-TOF) calcd for C<sub>10</sub>H<sub>10</sub>FO<sub>2</sub> [M+H]<sup>+</sup>: 180.0659, found: 180.0661. **IR** (neat): 3086, 3024, 2987, 2907, 1705, 1490, 1407, 1284, 1229, 925, 751 cm<sup>-1</sup>.

### 2-(2-Chlorophenyl)but-3-enoic acid (**2j**)

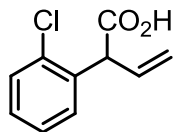

According to the procedure, (E)-3-(2-Chlorophenyl)allyl acetate (**1h**) was electrolyzed for 3h. The product was purified by flash column chromatography on silica to afford **2h** (52.0 mg, 87% yield) as a yellow solid.

**<sup>1</sup>H NMR** (400 MHz, CDCl<sub>3</sub>) δ 7.38 (t, *J* = 8.3 Hz, 2H), 7.29–7.19 (m, 2H), 6.22–6.13 (m, 1H), 5.29 (d, *J* = 10.2 Hz, 1H), 5.18 (d, *J* = 17.2 Hz, 1H), 4.87 (d, *J* = 7.3 Hz, 1H). **<sup>13</sup>C NMR** (101 MHz, CDCl<sub>3</sub>) δ 178.15, 135.11, 133.95, 133.40, 129.79, 129.74, 128.85, 127.13, 118.89, 51.82. **HRMS** (ESI-TOF) calcd for C<sub>10</sub>H<sub>10</sub>ClO<sub>2</sub> [M+H]<sup>+</sup>: 197.0364, found: 197.0366. **IR** (neat): 3067, 2961, 2919, 2853, 1693, 1293, 928, 747, 648 cm<sup>-1</sup>.

### 2-(2-Bromophenyl)but-3-enoic acid (**2k**)

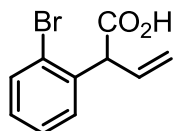

According to the procedure, with DPPE as the ligand, (E)-3-(2-Bromophenyl)allyl acetate (**1k**) was electrolyzed for 4h. The product was purified by flash column chromatography on silica to afford **2k** (61.5 mg, 85% yield) as a colorless oil.

**<sup>1</sup>H NMR** (400 MHz, CDCl<sub>3</sub>) δ 7.58 (d, *J* = 8.0 Hz, 1H), 7.36 (d, *J* = 7.7 Hz, 1H), 7.29 (t, *J* = 7.6 Hz, 1H), 7.13 (t, *J* = 7.6 Hz, 1H), 6.25–6.07 (m, 1H), 5.29 (d, *J* = 10.2 Hz,

1H), 5.18 (d,  $J = 17.1$  Hz, 1H), 4.89 (d,  $J = 7.1$  Hz, 1H). **<sup>13</sup>C NMR** (101 MHz, CDCl<sub>3</sub>)  $\delta$  177.72, 136.81, 133.36, 133.11, 129.82, 129.06, 127.74, 124.63, 118.82, 54.19. **HRMS** (EI) calcd for C<sub>10</sub>H<sub>9</sub>O<sub>2</sub>Br: 239.9786, found: 239.9792. **IR** (neat): 3061, 3001, 2983, 2826, 1692, 1636, 1422, 1292, 1024, 926, 744, 643 cm<sup>-1</sup>

### 2-(2-(Trifluoromethyl)phenyl)but-3-enoic acid (**2l**)

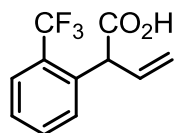

According to the procedure, (E)-3-(2-(Trifluoromethyl)phenyl)allyl acetate (**1l**) was electrolyzed for 3h. The product was purified by flash column chromatography on silica to afford **2l** (50.0 mg, 72% yield) as a yellowish oil.

**<sup>1</sup>H NMR** (400 MHz, CDCl<sub>3</sub>)  $\delta$  7.66 (d,  $J = 8.0$  Hz, 1H), 7.59–7.49 (m, 2H), 7.37 (t,  $J = 7.1$  Hz, 1H), 6.19 – 6.10 (m, 1H), 5.26 (d,  $J = 10.2$  Hz, 1H), 5.14 (d,  $J = 17.1$  Hz, 1H), 4.79 (d,  $J = 7.1$  Hz, 1H). **<sup>13</sup>C NMR** (101 MHz, CDCl<sub>3</sub>)  $\delta$  177.81, 135.81, 134.36, 132.07, 130.26, 128.51(q,  $J = 59.8, 29.9$  Hz), 127.57, 126.05(q,  $J = 5.7$  Hz), 124.15(q,  $J = 273$  Hz), 118.74, 50.40. **<sup>19</sup>F NMR** (376 MHz, CDCl<sub>3</sub>)  $\delta$  -58.60. **HRMS** (EI) calcd for C<sub>11</sub>H<sub>9</sub>O<sub>2</sub>F<sub>3</sub>: 230.0555, found: 230.0566.

**IR** (neat): 3088, 3023, 2989, 2920, 1709, 1310, 1114, 1035, 926, 766 cm<sup>-1</sup>.

### 2-(3-Bromophenyl)but-3-enoic acid (**2m**)<sup>14</sup>

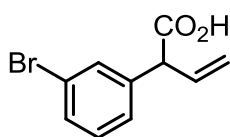

According to the procedure, (E)-3-(3-Bromophenyl)allyl acetate (**1m**) was electrolyzed for 3h. The product was purified by flash column chromatography on silica to afford **2m** (58.0 mg, 80% yield) as a yellow oil.

**<sup>1</sup>H NMR** (400 MHz, CDCl<sub>3</sub>)  $\delta$  7.47 (s, 1H), 7.42 (d,  $J = 7.7$  Hz, 1H), 7.25 (d,  $J = 7.6$  Hz, 1H), 7.20 (t,  $J = 7.7$  Hz, 1H), 6.24–6.08 (m, 1H), 5.27 (d,  $J = 10.2$  Hz, 1H), 5.19 (d,  $J = 17.1$  Hz, 1H), 4.28 (d,  $J = 8.0$  Hz, 1H). **<sup>13</sup>C NMR** (101 MHz, CDCl<sub>3</sub>)  $\delta$  178.18, 139.34, 134.15, 131.21, 130.79, 130.29, 126.80, 122.75, 118.82, 55.02. **HRMS** (EI) calcd for C<sub>10</sub>H<sub>9</sub>O<sub>2</sub>Br: 239.9786, found: 239.9782.

### 2-(3-Fluoro-4-methoxyphenyl)but-3-enoic acid (**2n**)

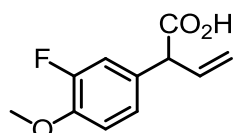

According to the procedure, (E)-3-(3-Fluoro-4-methoxyphenyl)allyl acetate (**1n**) was electrolyzed for 3h. The product was purified by flash column chromatography on silica to afford **2n** (53.0 mg, 83% yield) as a colorless oil.

**<sup>1</sup>H NMR** (400 MHz, CDCl<sub>3</sub>)  $\delta$  7.08 (dd,  $J = 12.1, 2.0$  Hz, 1H), 7.02 (d,  $J = 8.6$  Hz, 1H),

6.92 (t,  $J = 8.5$  Hz, 1H), 6.28–6.06 (m, 1H), 5.26 (d,  $J = 10.2$  Hz, 1H), 5.18 (d,  $J = 17.1$  Hz, 1H), 4.26 (d,  $J = 7.9$  Hz, 1H), 3.87 (s, 3H).  $^{13}\text{C}$  NMR (101 MHz,  $\text{CDCl}_3$ )  $\delta$  178.32, 152.25 (d,  $J = 246.4$  Hz), 147.08 (d,  $J = 10.7$  Hz), 134.5, 130.06 (d,  $J = 6.3$  Hz), 123.89 (d,  $J = 3.6$  Hz), 118.3, 115.93 (d,  $J = 19.2$  Hz), 113.44 (d,  $J = 2.1$  Hz), 56.25, 54.40.  $^{19}\text{F}$  NMR (376 MHz,  $\text{CDCl}_3$ )  $\delta$  -134.35. HRMS (EI) calcd for  $\text{C}_{11}\text{H}_{11}\text{O}_3\text{F}$ : 210.0692, found: 210.0687.

IR (neat): 3083, 3010, 2936, 2841, 1704, 1513, 1270, 1150, 1026, 925, 759, 731, 638  $\text{cm}^{-1}$ .

### 2-(2-Bromo-4-methylphenyl)but-3-enoic acid (2o)

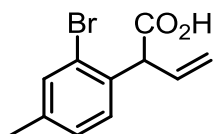

According to the procedure, (E)-3-(2-bromo-4-methylphenyl)allyl acetate (**1o**) was electrolyzed for 3h. The product was purified by flash column chromatography on silica to afford **2o** (73.3 mg, 95% yield) as a yellow oil.

$^1\text{H}$  NMR (400 MHz,  $\text{CDCl}_3$ )  $\delta$  7.44 (s, 1H), 7.26 (d,  $J = 7.9$  Hz, 1H), 7.13 (d,  $J = 7.8$  Hz, 1H), 6.26–6.06 (m, 1H), 5.30 (d,  $J = 10.2$  Hz, 1H), 5.20 (d,  $J = 17.2$  Hz, 1H), 4.87 (d,  $J = 7.2$  Hz, 1H), 2.32 (s, 1H).  $^{13}\text{C}$  NMR (101 MHz,  $\text{CDCl}_3$ )  $\delta$  178.28, 139.32, 133.78, 133.75, 133.54, 129.47, 128.62, 124.37, 118.64, 53.85, 20.70. HRMS (EI) calcd for  $\text{C}_{11}\text{H}_{11}\text{O}_2\text{Br}$ : 253.9942, found: 253.9953.

IR (neat): 3084, 3022, 2983, 2921, 1703, 1406, 1283, 1214, 1037, 922, 742, 673  $\text{cm}^{-1}$ .

### 2-(2-Bromo-4-fluorophenyl)but-3-enoic acid (2p)

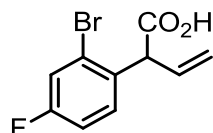

According to the procedure, (E)-3-(2-bromo-4-fluorophenyl)allyl acetate (**1p**) was electrolyzed for 3h. The product was purified by flash column chromatography on silica to afford **2p** (73.0 mg, 93% yield) as a yellowish oil.

$^1\text{H}$  NMR (400 MHz,  $\text{CDCl}_3$ )  $\delta$  7.39–7.31 (m, 2H), 7.05 (td,  $J = 8.2, 2.6$  Hz, 1H), 6.21–6.05 (m, 1H), 5.32 (d,  $J = 10.2$  Hz, 1H), 5.19 (d,  $J = 17.2$  Hz, 1H), 4.86 (d,  $J = 7.1$  Hz, 1H).  $^{13}\text{C}$  NMR (101 MHz,  $\text{CDCl}_3$ )  $\delta$  177.74, 161.53 (d,  $J = 251.3$  Hz), 133.42, 132.78 (d,  $J = 3.6$  Hz), 130.80 (d,  $J = 8.5$  Hz), 124.63 (d,  $J = 9.4$  Hz), 120.26 (d,  $J = 24.5$  Hz), 119.02, 114.98 (d,  $J = 21.1$  Hz), 53.42.  $^{19}\text{F}$  NMR (376 MHz,  $\text{CDCl}_3$ )  $\delta$  -112.40. HRMS (EI) calcd for  $\text{C}_{10}\text{H}_8\text{O}_2\text{FBr}$ : 257.9692, found: 257.9700.

IR (neat): 3085, 3017, 2985, 2919, 1705, 1596, 1484, 1221, 1167, 875, 673  $\text{cm}^{-1}$ .

### 2-(2-Bromo-4-methoxyphenyl)but-3-enoic acid (2q)

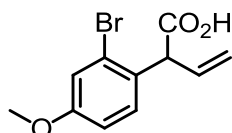



According to the procedure, (E)-3-(2-Bromo-4-methoxyphenyl)allyl acetate (**1q**) was electrolyzed for 3h. The product was purified by flash column chromatography on silica to afford **2q** (59.0 mg, 72% yield) as a colorless oil.

**<sup>1</sup>H NMR** (400 MHz, CDCl<sub>3</sub>) δ 7.26 (d, *J* = 8.7 Hz, 1H), 7.12 (s, 1H), 6.85 (d, *J* = 8.6, 1H), 6.21–6.00 (m, 1H), 5.26 (d, *J* = 10.2 Hz, 1H), 5.15 (d, *J* = 17.2 Hz, 1H), 4.81 (d, *J* = 7.0 Hz, 1H), 3.77 (s, 1H). **<sup>13</sup>C NMR** (101 MHz, CDCl<sub>3</sub>) δ 177.88, 159.26, 133.91, 130.19, 128.80, 124.82, 118.44, 118.16, 113.93, 55.53, 53.33. **HRMS** (EI) calcd for C<sub>11</sub>H<sub>11</sub>O<sub>3</sub>Br: 269.9892, found: 269.9902.

**IR** (neat): 3084, 3005, 2939, 1907, 2836, 1703, 1601, 1490, 1283, 1228, 1180, 1026, 923, 862, 741, 676 cm<sup>-1</sup>.

### 2-(4-Bromo-2-methoxyphenyl)but-3-enoic acid (**2r**)

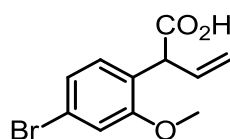

According to the procedure, (E)-3-(4-Bromo-2-methoxyphenyl)allyl acetate (**1r**) was electrolyzed for 3h. The product was purified by flash column chromatography on silica to afford **2r** (61.0 mg, 75% yield) as a yellow oil.

**<sup>1</sup>H NMR** (400 MHz, CDCl<sub>3</sub>) δ 7.49 (d, *J* = 8.1 Hz, 1H), 6.85 (s, 1H), 6.81 (d, *J* = 8.1 Hz, 1H), 6.23–6.11 (m, 1H), 5.27 (d, *J* = 10.2 Hz, 1H), 5.20 (d, *J* = 17.1 Hz, 1H), 4.29 (d, *J* = 7.8 Hz, 1H), 3.89 (s, 3H). **<sup>13</sup>C NMR** (101 MHz, CDCl<sub>3</sub>) δ 177.90, 156.00, 138.00, 134.32, 133.44, 121.47, 118.60, 111.85, 111.03, 56.22, 55.19. **HRMS** (EI) calcd for C<sub>11</sub>H<sub>11</sub>O<sub>3</sub>Br: 269.9892, found: 269.9901.

**IR** (neat): 3082, 3007, 2939, 1703, 1581, 1484, 1403, 1280, 1164, 1045, 1024, 725, 670 cm<sup>-1</sup>.

### 2-(Naphthalen-2-yl)but-3-enoic acid (**2s**)

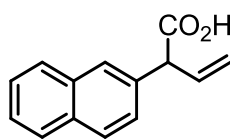

According to the procedure, with DPPE as the ligand, (E)-3-(Naphthalen-2-yl)allyl acetate (**1s**) was electrolyzed for 3h. The product was purified by flash column chromatography on silica to afford **2s** (52.5 mg, 82% yield) as a white solid.

**<sup>1</sup>H NMR** (400 MHz, CDCl<sub>3</sub>) δ 7.89–7.77 (m, 4H), 7.54–7.44 (m, 3H), 6.42–6.26 (m, 1H), 5.31 (d, *J* = 10.2 Hz, 1H), 5.25 (d, *J* = 17.2 Hz, 1H), 4.53 (d, *J* = 7.7 Hz, 1H). **<sup>13</sup>C NMR** (101 MHz, CDCl<sub>3</sub>) δ 178.70, 134.86, 134.73, 133.44, 132.74, 128.54, 127.89, 127.65, 127.08, 126.30, 126.12, 126.00, 118.36, 55.60. **HRMS** (ESI-TOF) calcd for C<sub>14</sub>H<sub>16</sub>NO<sub>2</sub> [M+NH<sub>4</sub>]<sup>+</sup>: 230.1176, found: 230.1176

**IR** (neat): 3067, 2985, 2923, 2853, 1693, 1405, 1210, 929, 825, 748 cm<sup>-1</sup>.

### 2-(Naphthalen-1-yl)but-3-enoic acid (**2t**)

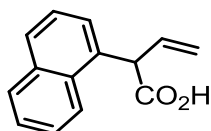

According to the procedure, with DPPE as the ligand, (E)-3-(Naphthalen-1-yl)allyl acetate (**1t**) was electrolyzed for 3h. The product was purified by flash column chromatography on silica to afford **2t** (51.5 mg, 81% yield) as a white solid.

**<sup>1</sup>H NMR** (400 MHz, CDCl<sub>3</sub>) δ 8.08 (d, *J* = 8.2 Hz, 1H), 7.90 (d, *J* = 8.0 Hz, 1H), 7.83 (d, *J* = 8.0 Hz, 1H), 7.60–7.40 (m, 4H), 6.50–6.30 (m, 1H), 5.33 (d, *J* = 10.3 Hz, 1H), 5.23 (d, *J* = 17.2 Hz, 1H), 5.12 (d, *J* = 7.1 Hz, 1H). **<sup>13</sup>C NMR** (101 MHz, CDCl<sub>3</sub>) δ 178.99, 134.44, 134.06, 133.51, 131.29, 129.02, 128.43, 126.56, 126.32, 125.82, 125.53, 123.34, 118.60, 51.61. **HRMS** (ESI-TOF) calcd for C<sub>14</sub>H<sub>16</sub>NO<sub>2</sub> [M+NH<sub>4</sub>]<sup>+</sup>: 230.1176, found: 230.1176.

**IR** (neat): 3042, 2890, 2822, 2659, 2565, 1689, 1596, 1417, 1289, 946, 775 cm<sup>-1</sup>.

### 2-(Phenanthren-9-yl)but-3-enoic acid (**2u**)

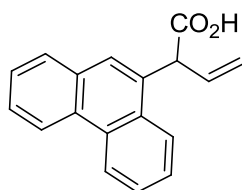

According to the procedure, (E)-3-(Phenanthren-9-yl)allyl acetate (**1u**) was electrolyzed for 3h. The product was purified by flash column chromatography on silica to afford **2u** (72.4 mg, 92% yield) as a white solid.

**<sup>1</sup>H NMR** (400 MHz, CDCl<sub>3</sub>) δ 8.76 (d, *J* = 8.0 Hz, 1H), 8.67 (d, *J* = 8.2 Hz, 1H), 8.09 (d, *J* = 8.0 Hz, 1H), 7.87 (d, *J* = 7.8 Hz, 1H), 7.77 (s, 1H), 7.72–7.54 (m, 4H), 6.46 (ddd, *J* = 17.2, 10.3, 7.0 Hz, 1H), 5.37 (d, *J* = 10.3 Hz, 1H), 5.27 (d, *J* = 17.3 Hz, 1H), 5.10 (d, *J* = 6.9 Hz, 1H). **<sup>13</sup>C NMR** (101 MHz, CDCl<sub>3</sub>) δ 178.45, 134.13, 131.85, 131.33, 130.95, 130.17, 130.14, 128.75, 127.57, 126.97, 126.93, 126.83, 126.55, 124.14, 123.40, 122.46, 118.97, 51.99. **HRMS** (ESI-TOF) calcd for C<sub>18</sub>H<sub>18</sub>NO<sub>2</sub> [M+NH<sub>4</sub>]<sup>+</sup>: 280.1332, found: 280.1333.

**IR** (neat): 2952, 2919, 2852, 1689, 1635, 1404, 1200, 926, 764, 742, 615 cm<sup>-1</sup>.



(*R*)-BINAP as the ligand.  $t_R$  minor: 8.6 min,  $t_R$  major: 9.4 min, 56% *ee*

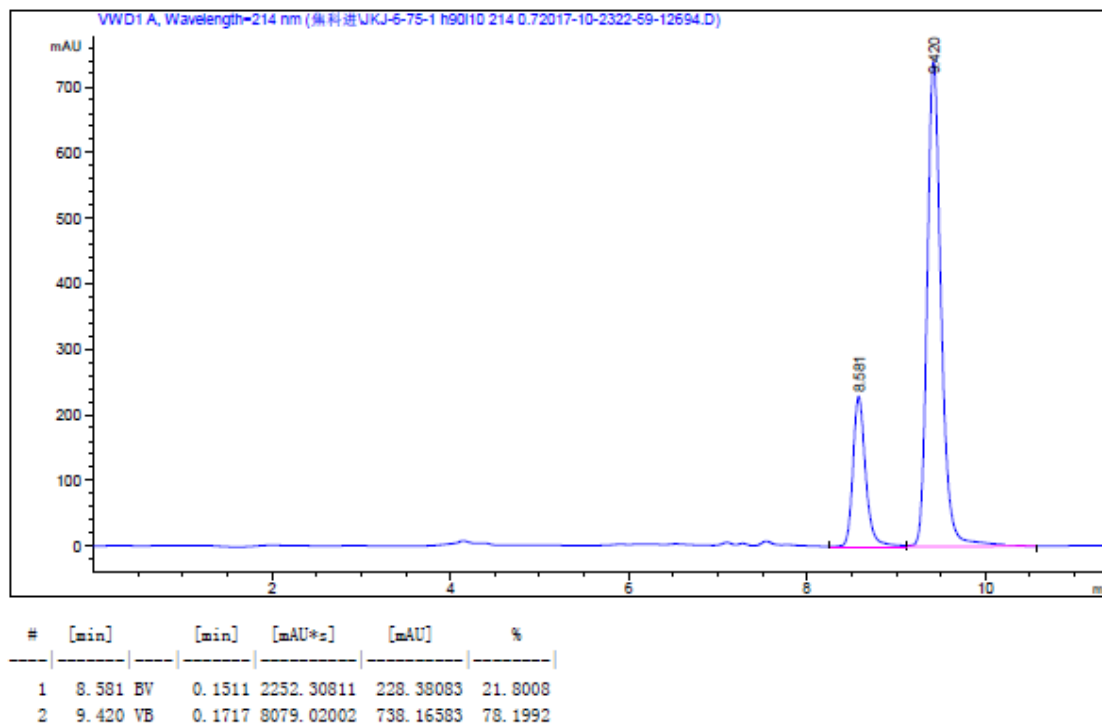

(*S*)-SegPhos as the ligand.  $t_R$  minor: 8.6 min,  $t_R$  major: 9.4 min, 60% *ee*

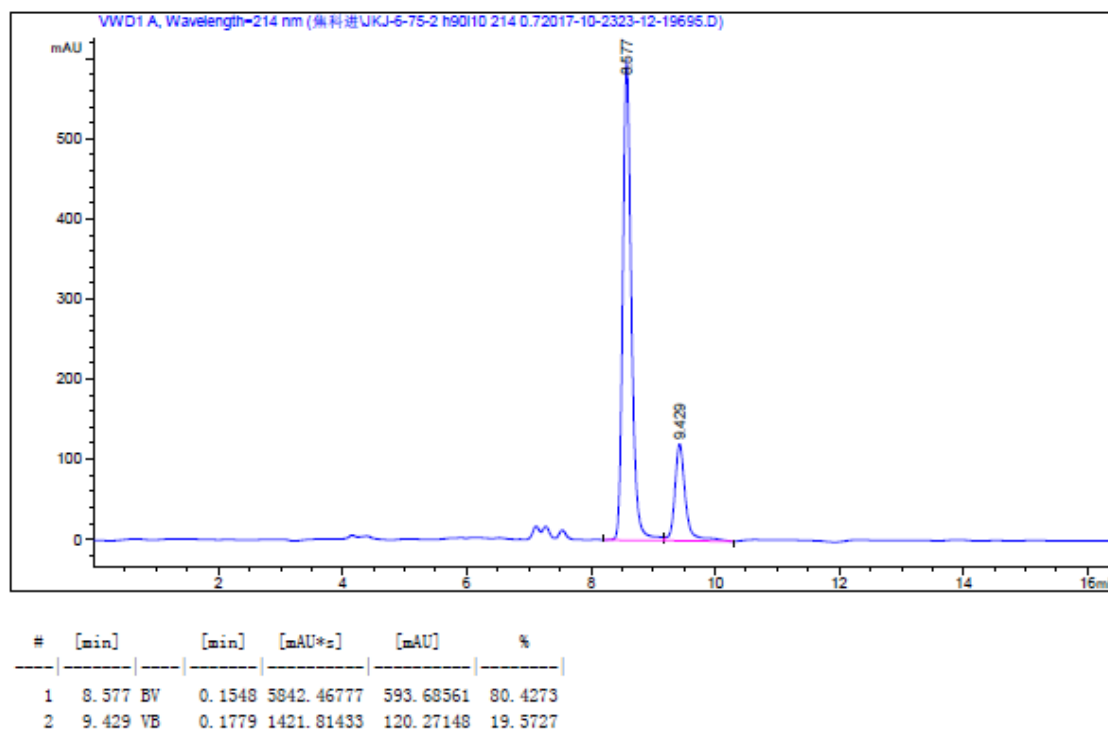

(*R*)-MeO-BIPHME as the ligand.  $t_R$  minor: 8.6 min,  $t_R$  major: 9.4 min, 67% *ee*

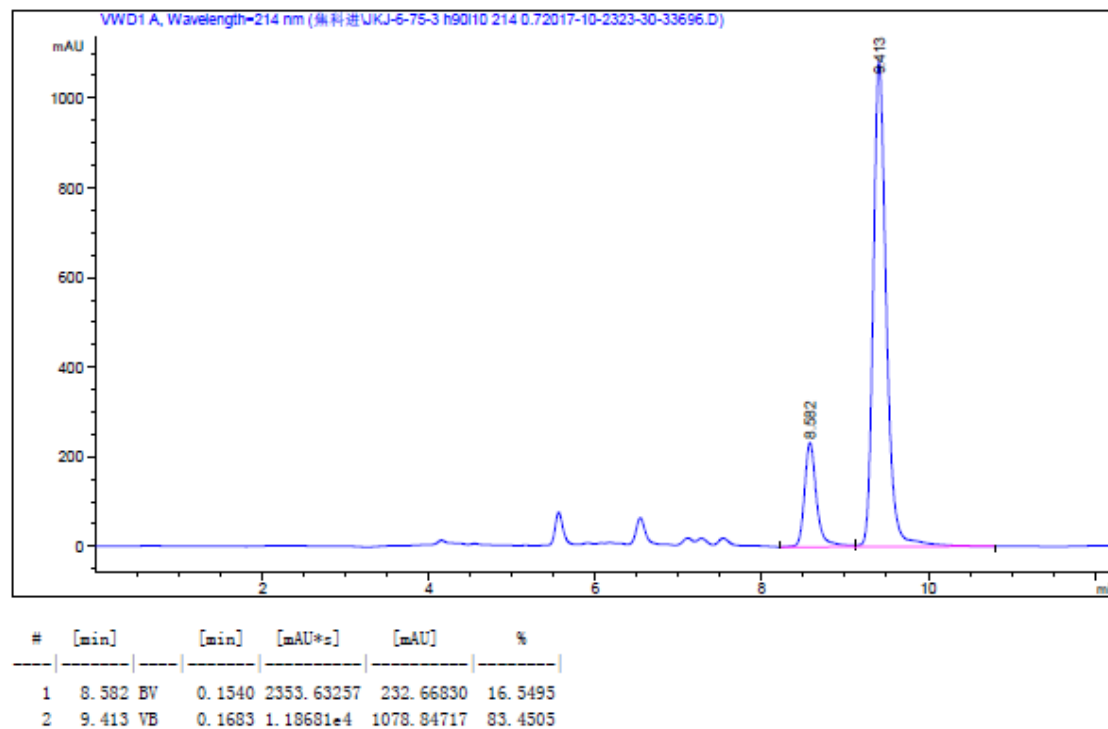

### Absolute Configuration of the Product

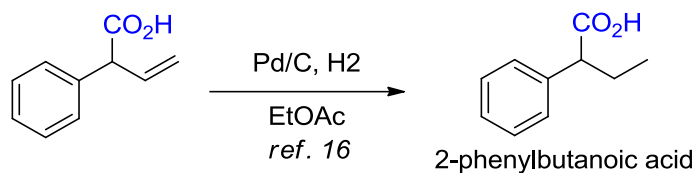

The (*R*)-2-phenylbutanoic acid was purchased for a contrast.

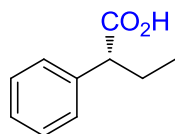

(*R*)-2-phenylbutanoic acid

**HPLC:** Chiralpak AD-H (10% IPA:hexane, flow rate 0.7 ml min<sup>-1</sup>, 214 nm, 40 °C)  $t_R$  minor: 8.3 min,  $t_R$  major: 9.7 min, 99% *ee*

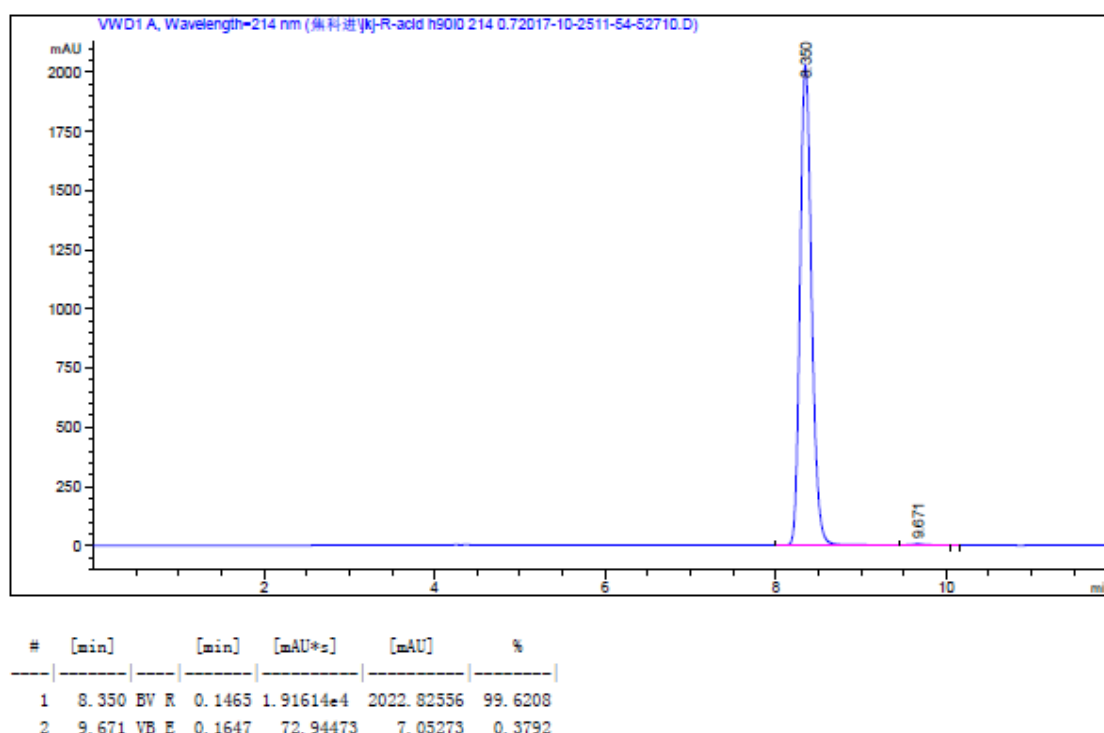

The product of (*R*)-MeO-BIPHME as ligand hydrogenated according to *ref. 10*

**HPLC:** Chiralpak AD-H (10% IPA:hexane, flow rate 0.7 ml min<sup>-1</sup>, 214 nm, 40 °C) t<sub>R</sub> minor: 8.3 min, t<sub>R</sub> major: 9.7 min, 65% *ee*

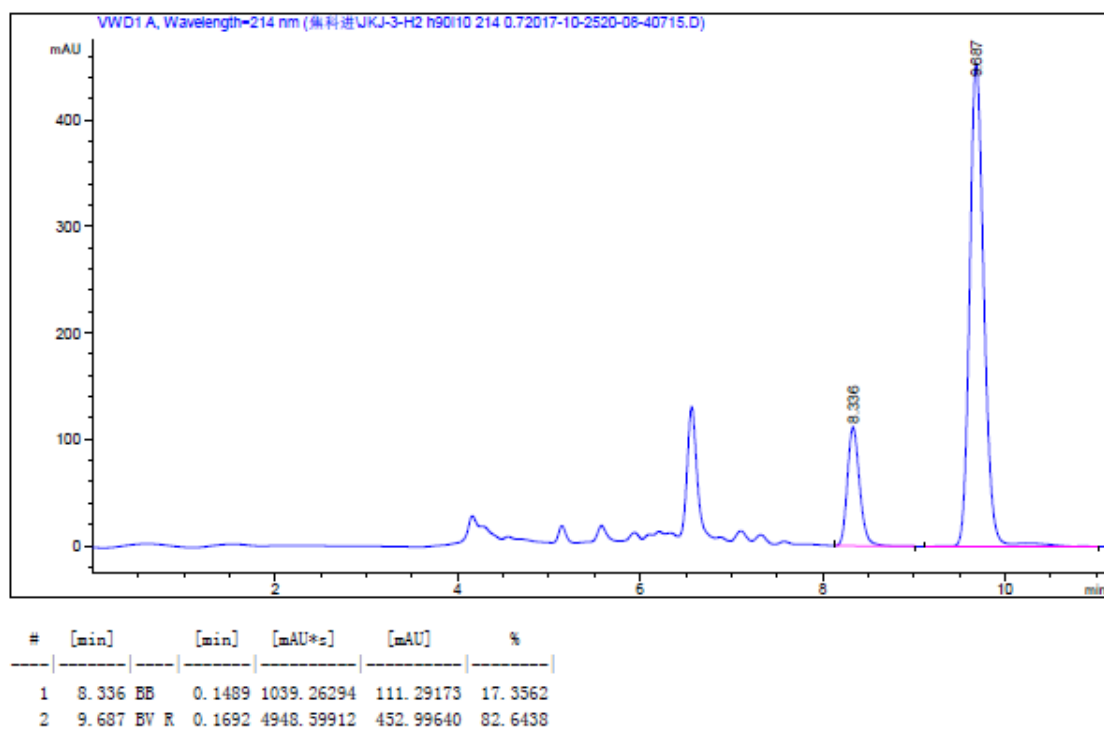

A mixture of (*R*)-2-phenylbutanoic acid and the hydrogenated product.

**HPLC:** Chiralpak AD-H (10% IPA:hexane, flow rate 0.7 ml min<sup>-1</sup>, 214 nm, 40 °C) t<sub>R</sub> minor: 8.3 min, t<sub>R</sub> major: 9.7 min, 0.7% *ee*

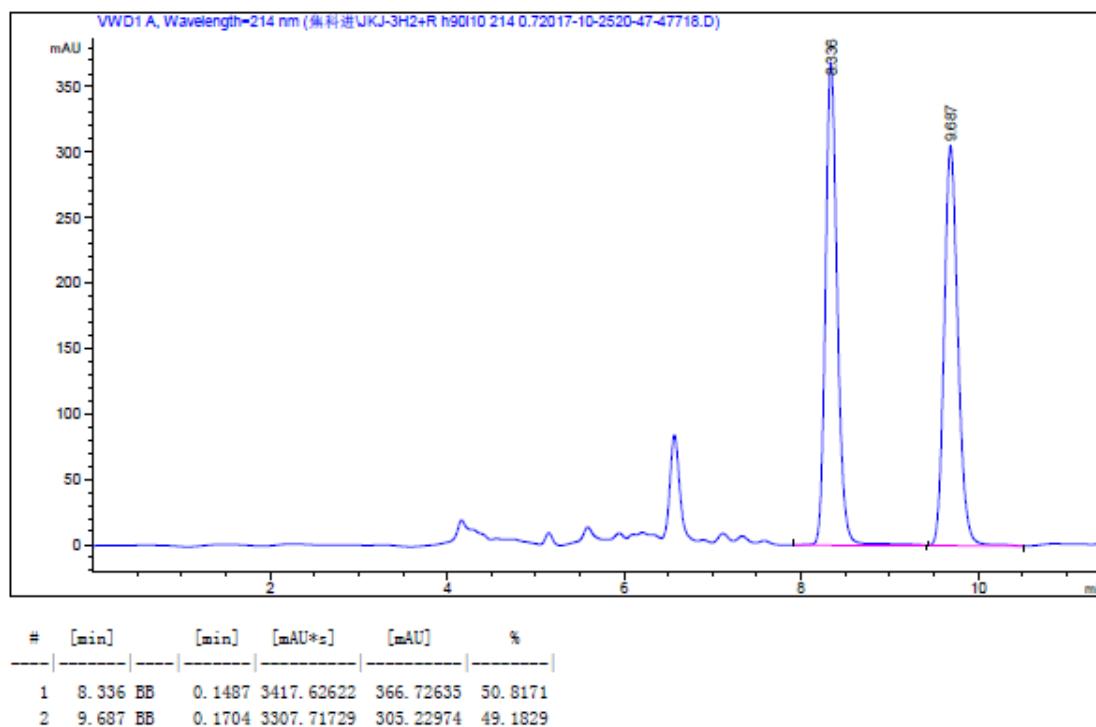

## 8 Electrochemical Set-up and Cyclic Voltammetry

### 1) Preparation of [(*R*)-BINAP]Pd(OAc)<sub>2</sub><sup>17</sup>

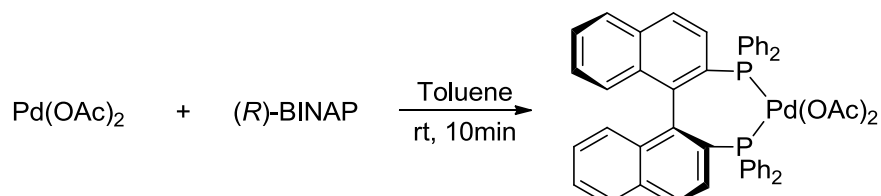

Procedure: A 25 mL Schlenk tube charged with stir bar was added Pd(OAc)<sub>2</sub> (0.45 mmol Pd, 100 mg) and (*R*)-BINAP (0.45 mmol, 280 mg). Capped vial and evacuated / backfilled with nitrogen three times. To the vial added 2 mL anhydrous toluene and stirred at room temperature for 5 – 10 minutes resulting in a red homogeneous solution. Added 5 mL pentane to reaction in air over 5 minutes resulting in a thick yellow slurry. The suspension was filtered, washed with 2x 5 mL pentane and dried under vacuum at room temperature for 1 hour. Collected 350 mg yellow solids for 92% yield.

**<sup>1</sup>H NMR** (400 MHz, CDCl<sub>3</sub>) δ 7.89 (br, 5H), 7.80–7.66, (m, 5H), 7.55 (d, *J* = 8.3 Hz, 5H), 7.49 (br, 7H), 7.34 (t, *J* = 7.4 Hz, 2H), 7.24 (t, 2H), 7.19–7.11 (m, 2H), 7.01 (t, *J* = 7.7 Hz, 2H), 6.80–6.72 (m, 3H), 6.68 (br, 3H), 6.53 (d, *J* = 8.6 Hz, 2H). 2.34 (s, 3H), 1.34 (s, 6H). **<sup>31</sup>P NMR** (400 MHz, CDCl<sub>3</sub>) δ: 25.4 ppm. (The signal of δ 2.34(s, 3H) belongs to toluene)

### 2) Cyclic Voltammetry

Cyclic voltammograms were recorded with a CHI660E potentiostat at room temperature in DMF. Bu<sub>4</sub>NPF<sub>6</sub> (0.07 M) was used as the supporting electrolyte, and a Pt electrode (0.03 cm<sup>2</sup>) was used as the working electrode. The auxiliary electrode was a platinum sheet. All potentials are referenced against the Ag/AgI redox couple.

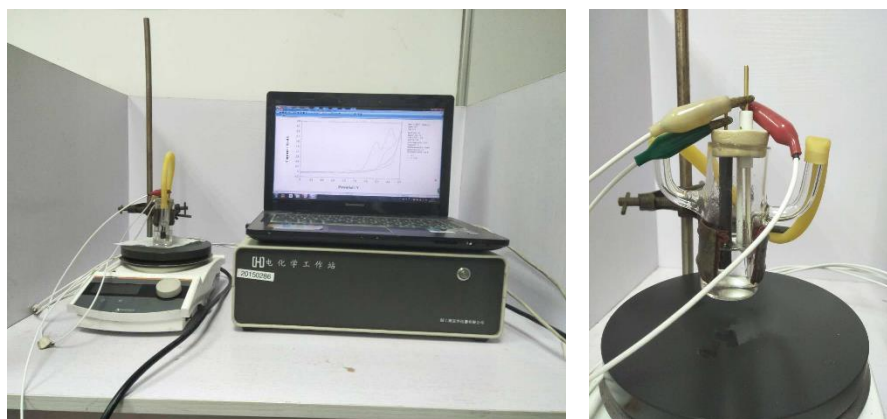

**Figure 1** Photograph of setup used for cyclic voltammetry.



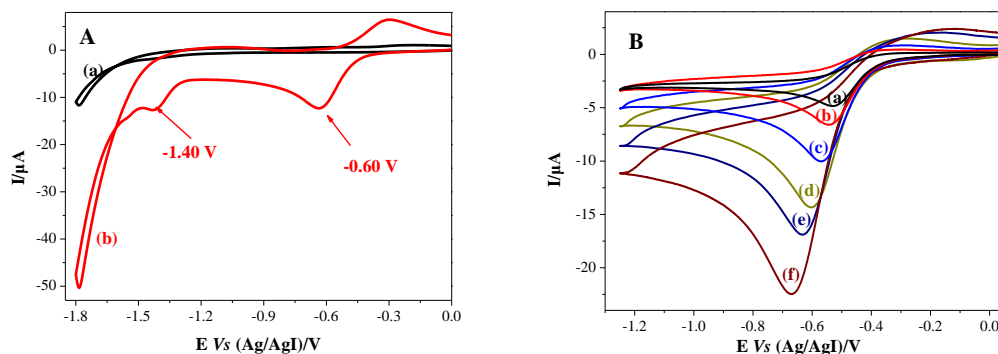

**Figure 2.** Cyclic voltammograms recorded on a Pt electrode (area = 0.031 cm<sup>2</sup>), A: (a) DMF containing 0.07 M Bu<sub>4</sub>NPF<sub>6</sub> ; (b) solution (a) after addition of 2 mM [(*R*)-BINAP]Pd(OAc)<sub>2</sub> ( $\nu = 100 \text{ mV s}^{-1}$ ); B: CVs of [(*R*)-BINAP]Pd(OAc)<sub>2</sub> (2 mM) eletroreduction at different scanning speed, (a) 0.01 V s<sup>-1</sup> (b) 0.02 V s<sup>-1</sup> (c) 0.05 V s<sup>-1</sup> (d) 0.1 V s<sup>-1</sup> (e) 0.2 V s<sup>-1</sup> (f) 0.3 V s<sup>-1</sup>.

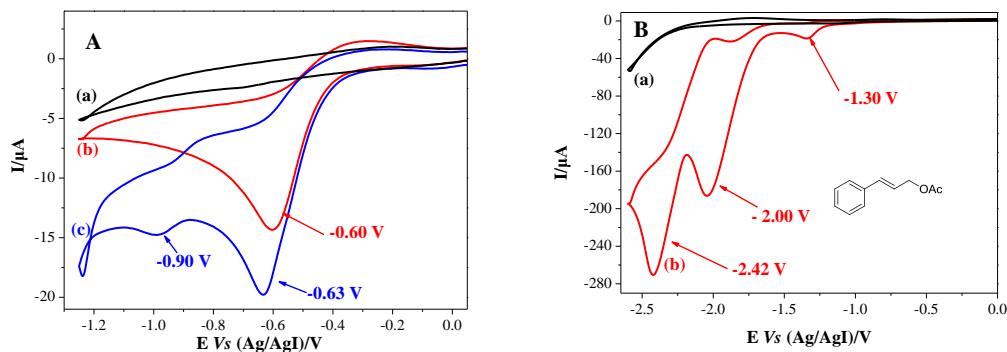

**Figure 3.** Cyclic voltammograms recorded on a Pt electrode (area = 0.031 cm<sup>2</sup>) at 100 mV s<sup>-1</sup>, A: (a) DMF containing 0.07 M Bu<sub>4</sub>NPF<sub>6</sub>; (b) solution (a) after addition of 2 mM [(*R*)-BINAP]Pd(OAc)<sub>2</sub>; (c) solution (b) after addition of 20 mM **1b**; B: DMF containing 0.07 M Bu<sub>4</sub>NPF<sub>6</sub> ; (b) solution (a) after addition of 20 mM **1b**.

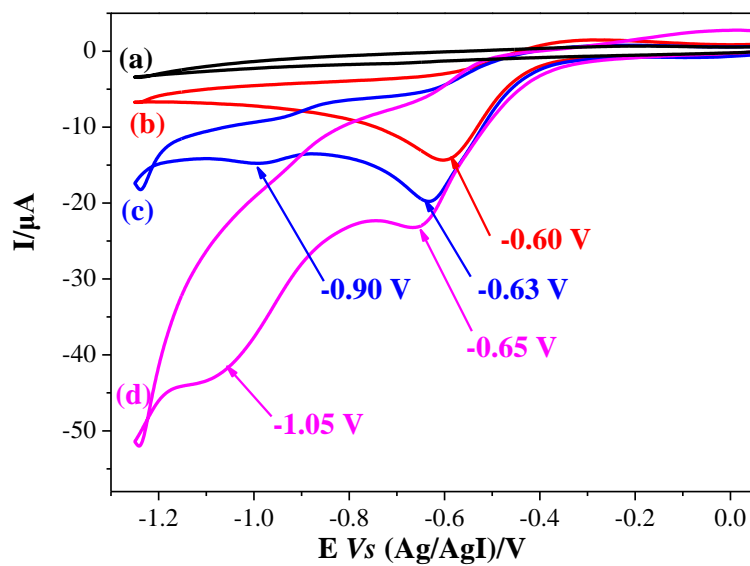

**Figure 4.** Cyclic voltammograms recorded on a Pt electrode (area = 0.031 cm<sup>2</sup>) at 100 mVs<sup>-1</sup> in: (a) DMF containing 0.07 M Bu<sub>4</sub>NPF<sub>6</sub>; (b) solution (a) after addition of 2 mM [(*R*)-BINAP]Pd(OAc)<sub>2</sub>; (c) solution (b) after addition of 20 mM **1b**; (d) solution (c) saturated with CO<sub>2</sub>.

## 9 Reference

- [1] Sun, Y. J.; Jiao, N. *Org. Lett.* **2009**, *11*, 2980
- [2] Saha, A.; Leazer, J.; Varma, R. S. *Green Chem.*, **2012**, *14*, 67.
- [3] Gigant, N.; Baeckvall, J. E. *Org. Lett.* **2014**, *16*, 1664.
- [4] Chu, J. C. K.; Dalton, D. M.; Rovis, T. *J. Am. Chem. Soc.* **2015**, *137*, 4445.
- [5] Ding, F.; William, R.; Wang, F.; Liu, X. L. *Chem. Commun.*, **2012**, *48*, 8709.
- [6] Gu, Y.; Martin, R. *Angew. Chem. Int. Ed.* **2017**, *56*, 3187.
- [7] Chang, S.; Huang, S.; Villarante, N. R.; Liao, C. *Eur. J. Org. Chem.* **2006**, *20*, 4648.
- [8] Gould, T. J.; Balestra, M.; Wittman, M. D.; Gary, J. A.; Rossano, L. T.; Kallmerten, J. *J. Org. Chem.* **1987**, *52*, 3889.
- [9] Huang, X.; Fulton, B.; White, K.; Bugarin, A. *Org. Lett.* **2015**, *17*, 2594.
- [10] Jiang, X.; Hartwig, J. F. *Angew. Chem. Int. Ed.* **2017**, *56*, 8887.
- [11] Zeng, R.; Fu, C.; Ma, S. *J. Am. Chem. Soc.*, **2012**, *134*, 9597.
- [12] Yue, Q.; Yang, T.; Yang, Y.; Zhang, C.; Zhang, Q.; Li, D. *Asian. J. Org. Chem.* **2017**, *6*, 936.
- [13] Gemmeren, M.; Brgjesson, M.; Tortajada, A.; Sun, S. Z.; Okura, K.; Martin, R. *Angew. Chem. Int. Ed.* **2017**, *56*, 6558.
- [14] Pour, M.; Spulak, M.; Balsanek, V.; Kunes, J.; Buchta, V.; Waisser, K. *Bioorg. Med. Chem. Lett.* **2000**, *10*, 1893.
- [15] Aggarwal, S. K.; Bradshaw, J. S.; Eguchi, M.; Parry, S.; Rossiter, B. E.; Markides, K. E.; Lee, M. L. *Tetrahedron* **1987**, *43*, 451.
- [16] Shockley, S. E.; Hethcox, J. C.; Stoltz, B. M. *Angew. Chem., Int. Ed.* **2017**, *56*, 11545
- [17] Carole, W. A.; Bradley, J.; Sarwar, M.; Colacot, T. J. *Org. Lett.* **2015**, *17*, 5472.

## 10 Spectra of Compounds

### <sup>1</sup>H NMR Spectrum of 1l (CDCl<sub>3</sub>)

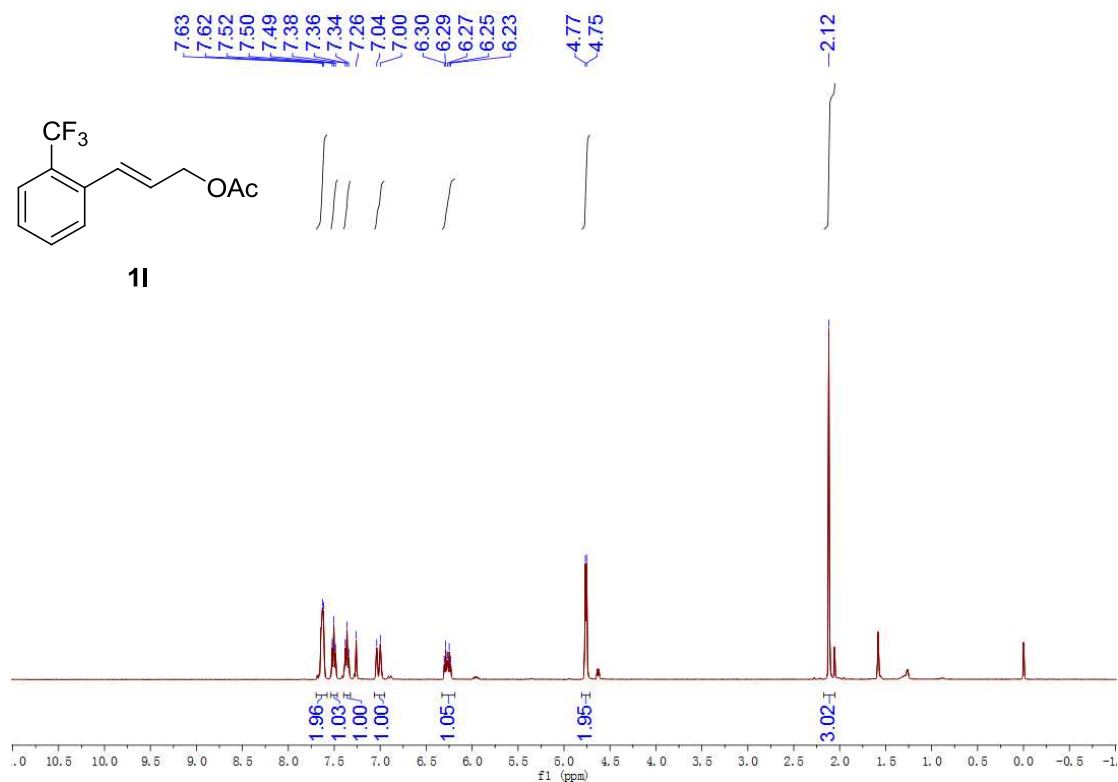

### <sup>13</sup>C NMR Spectrum of 1l (CDCl<sub>3</sub>)

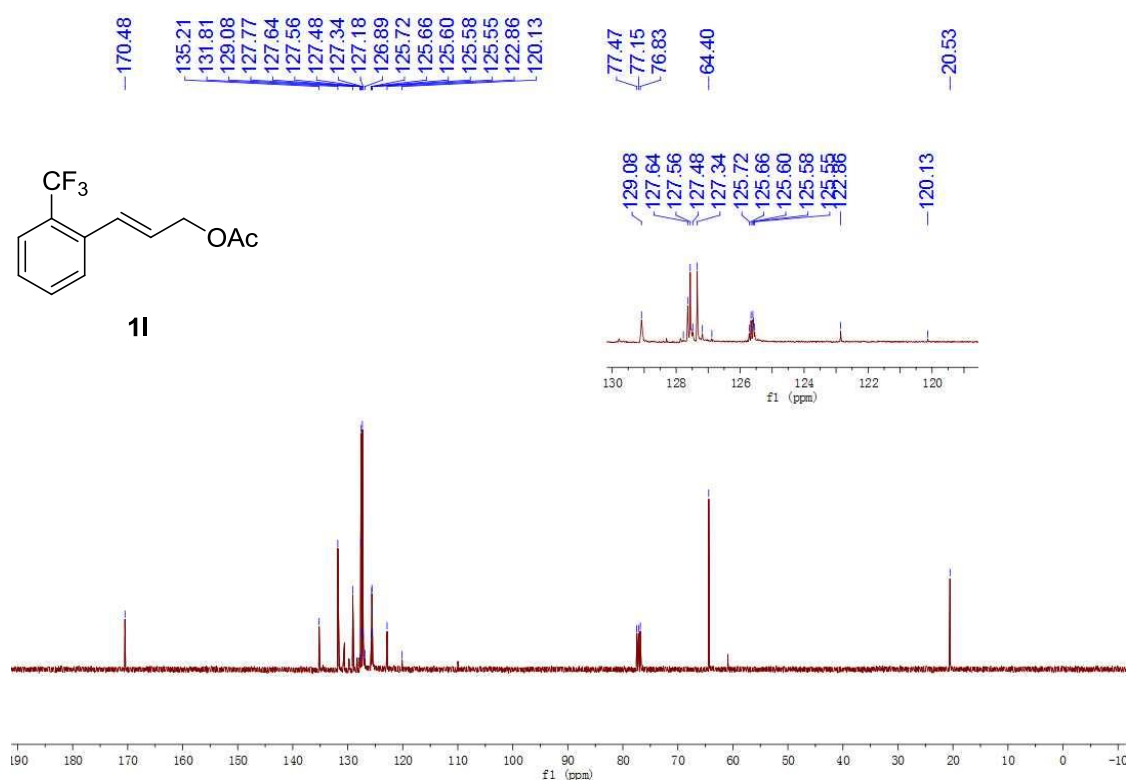

**$^{19}\text{F}$  NMR Spectrum of 1l ( $\text{CDCl}_3$ )**

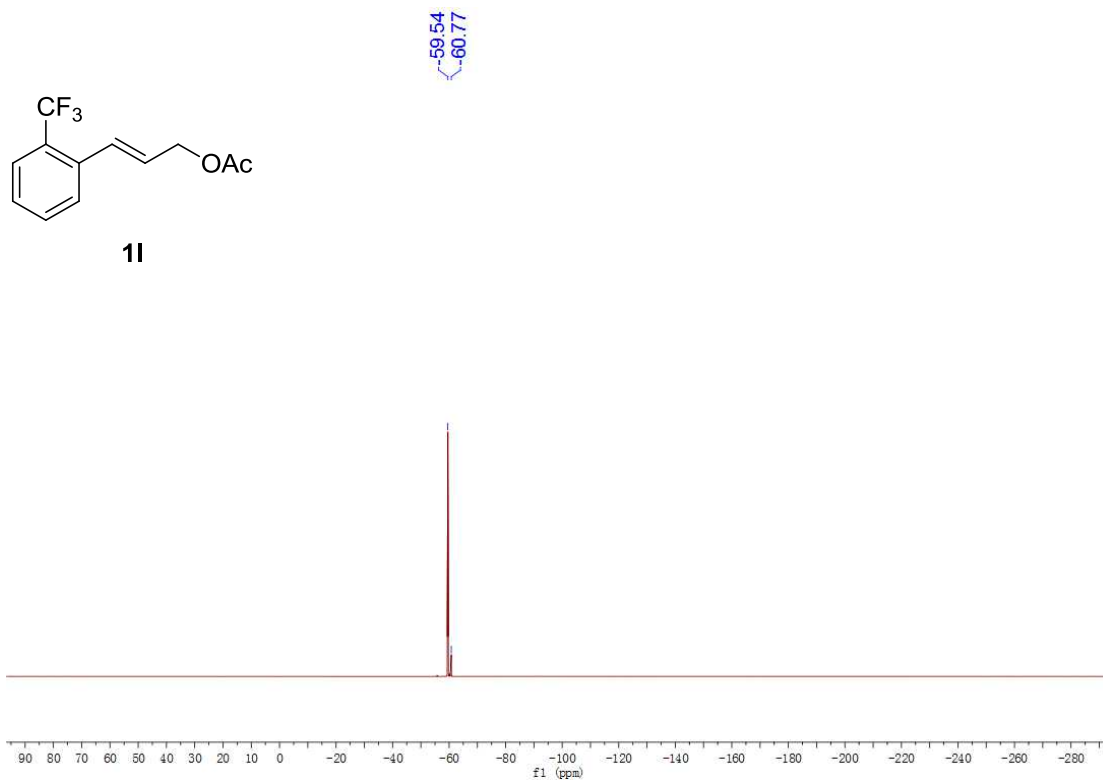

**$^1\text{H}$  NMR Spectrum of 1n ( $\text{CDCl}_3$ )**

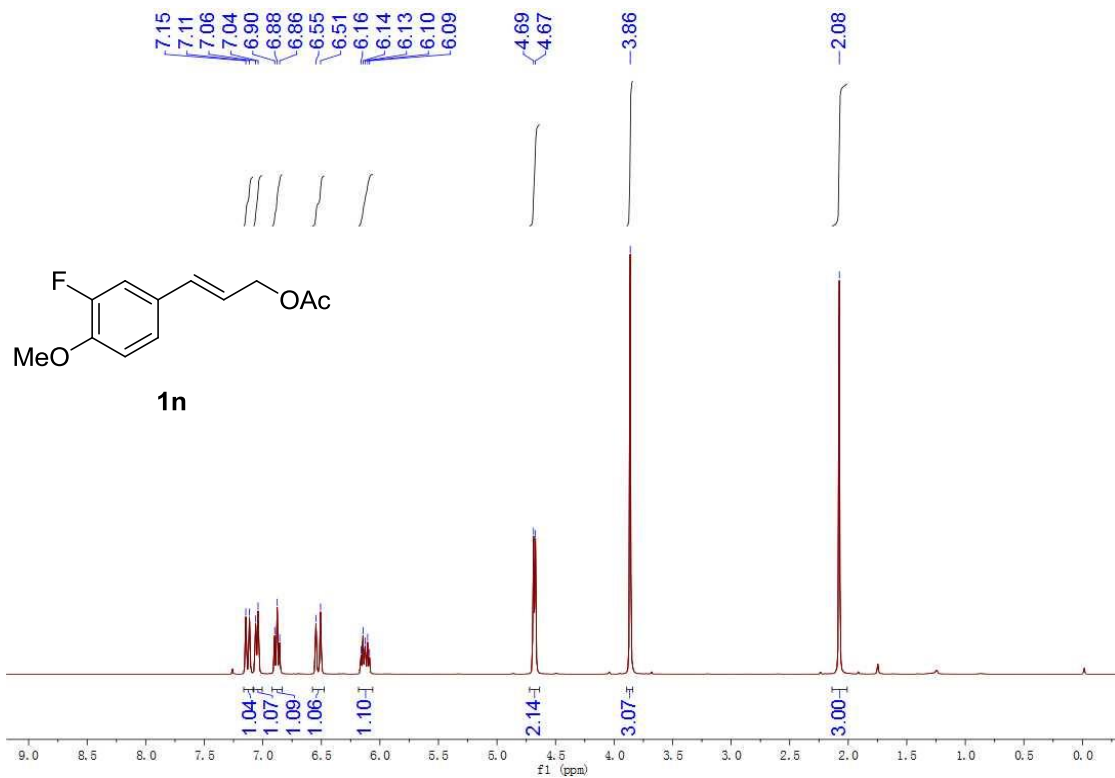

**<sup>13</sup>C NMR Spectrum of 1n (CDCl<sub>3</sub>)**

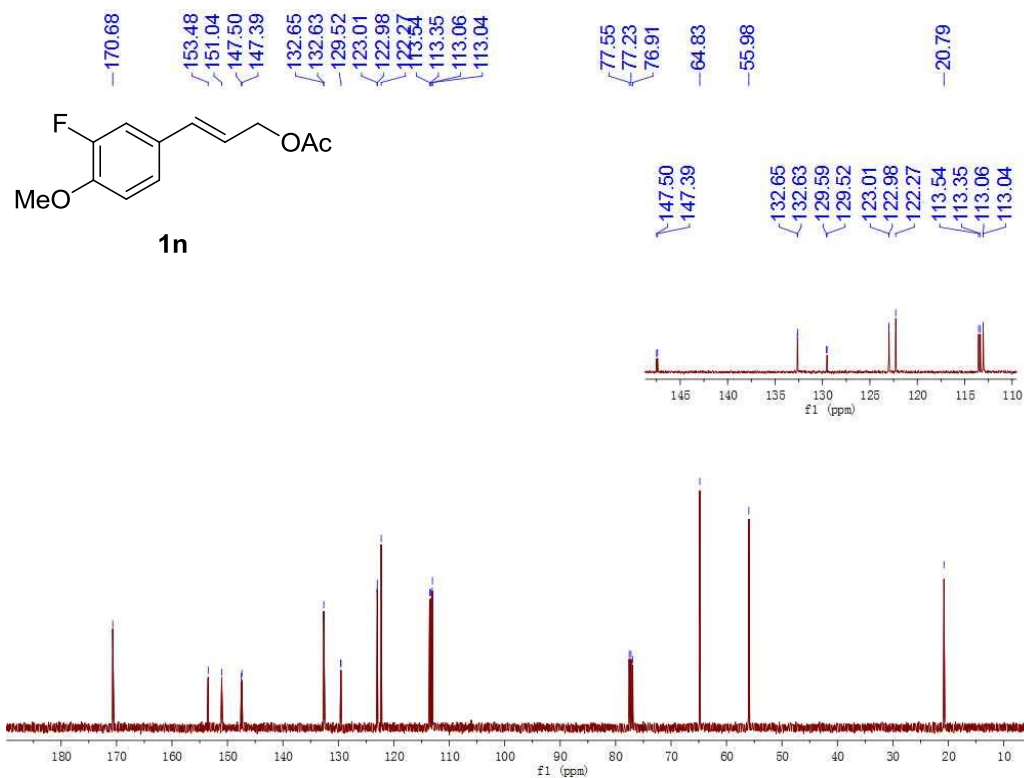

**<sup>19</sup>F NMR Spectrum of 1n (CDCl<sub>3</sub>)**

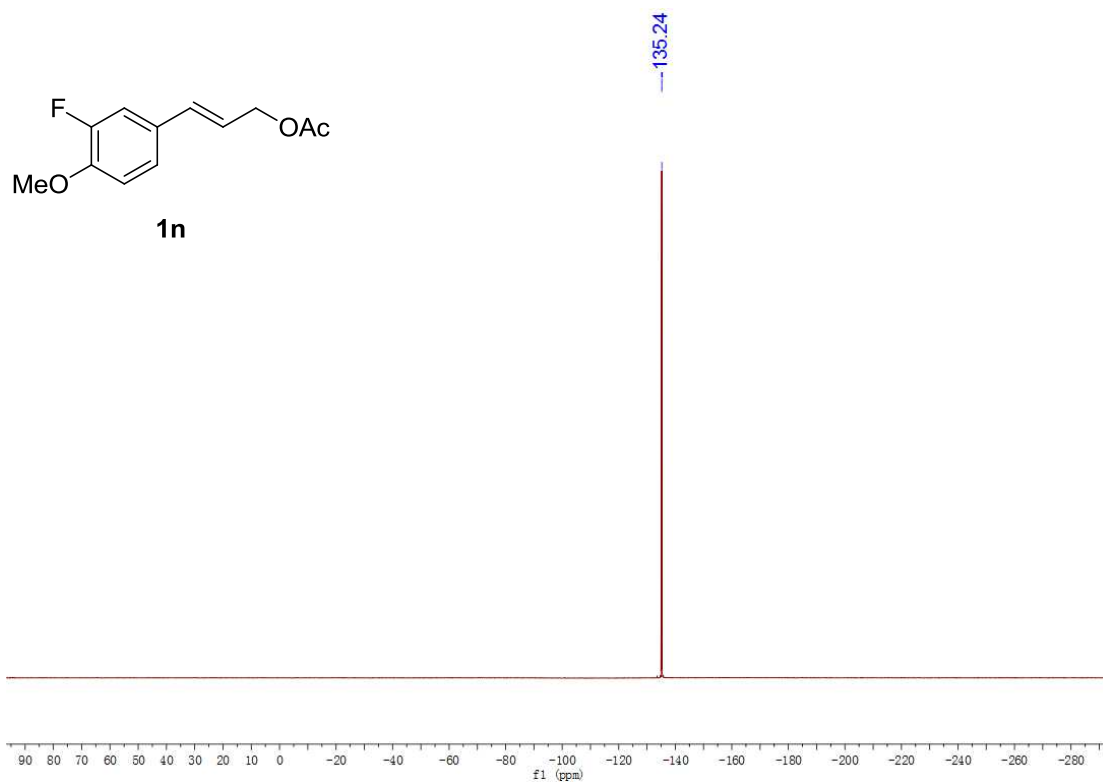

**<sup>1</sup>H NMR Spectrum of 1o (CDCl<sub>3</sub>)**

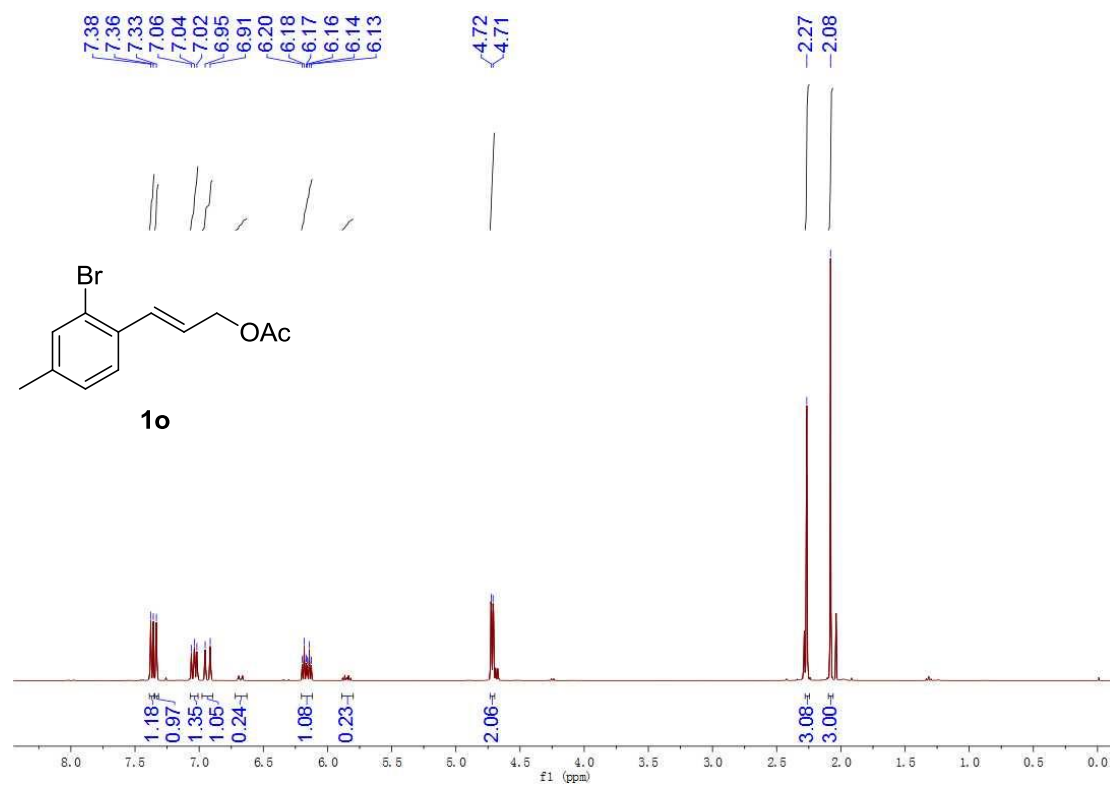

**<sup>13</sup>C NMR Spectrum of 1o (CDCl<sub>3</sub>)**

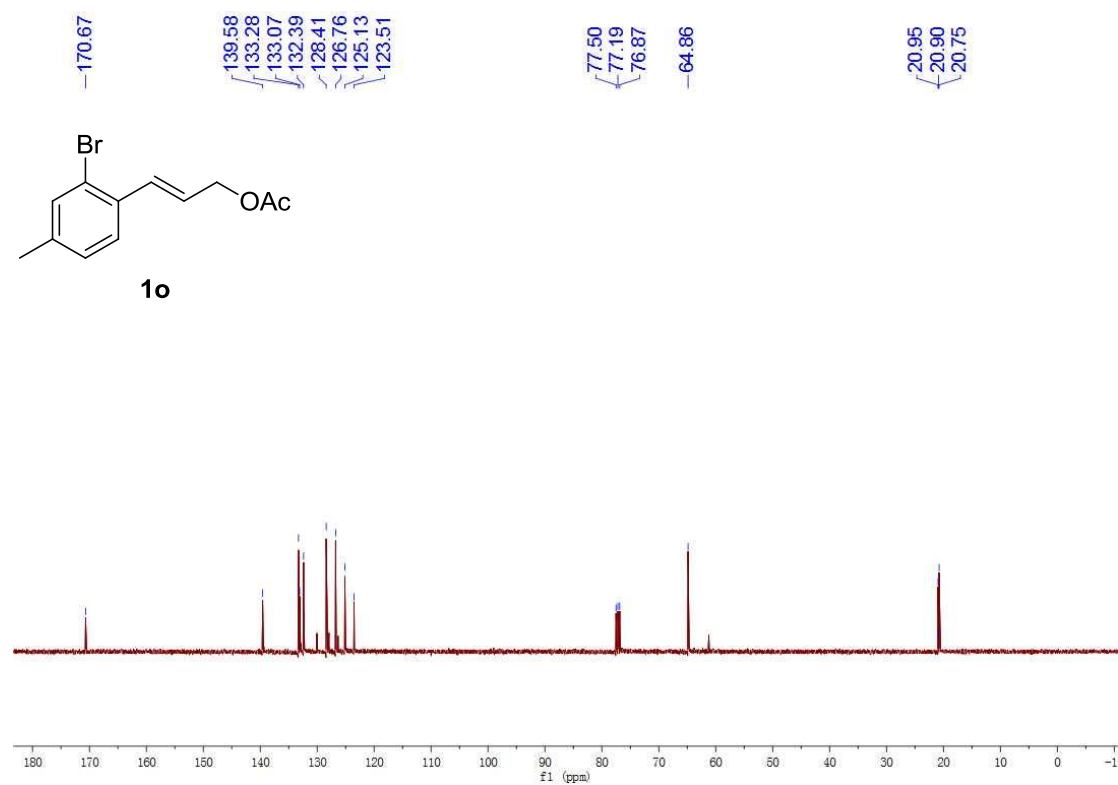

# **<sup>1</sup>H NMR Spectrum of 1p (CDCl<sub>3</sub>)**

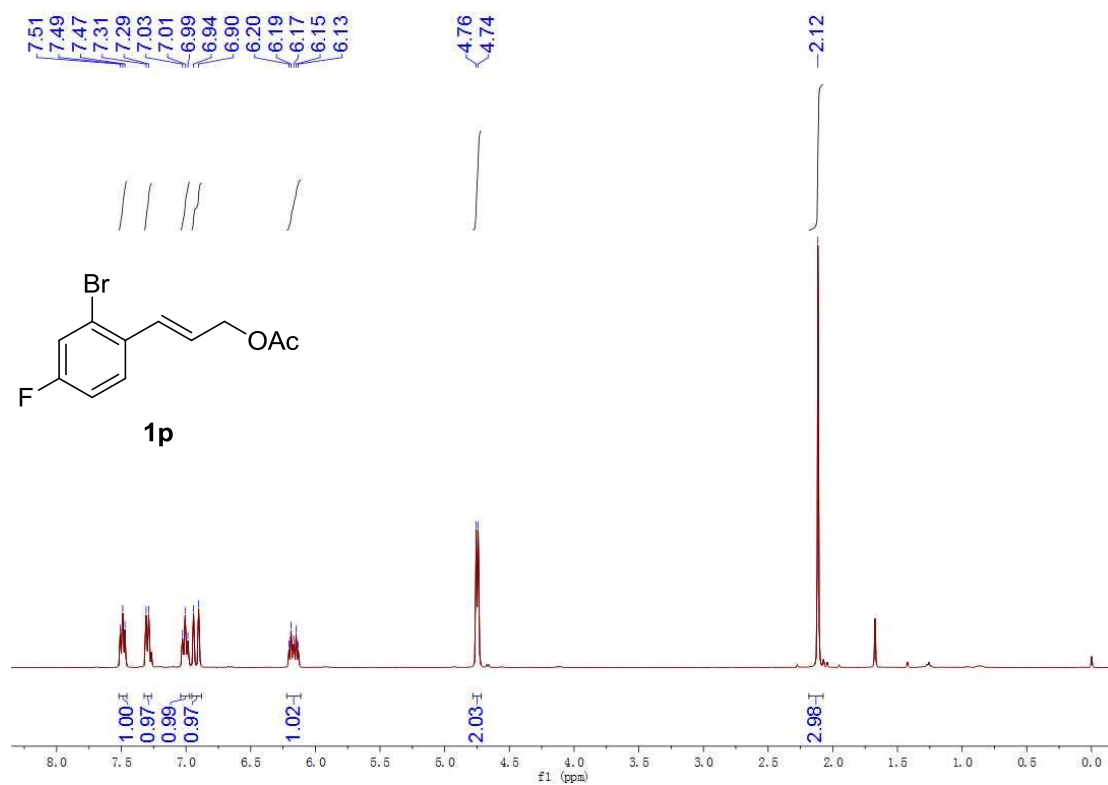

# **<sup>13</sup>C NMR Spectrum of 1p (CDCl<sub>3</sub>)**

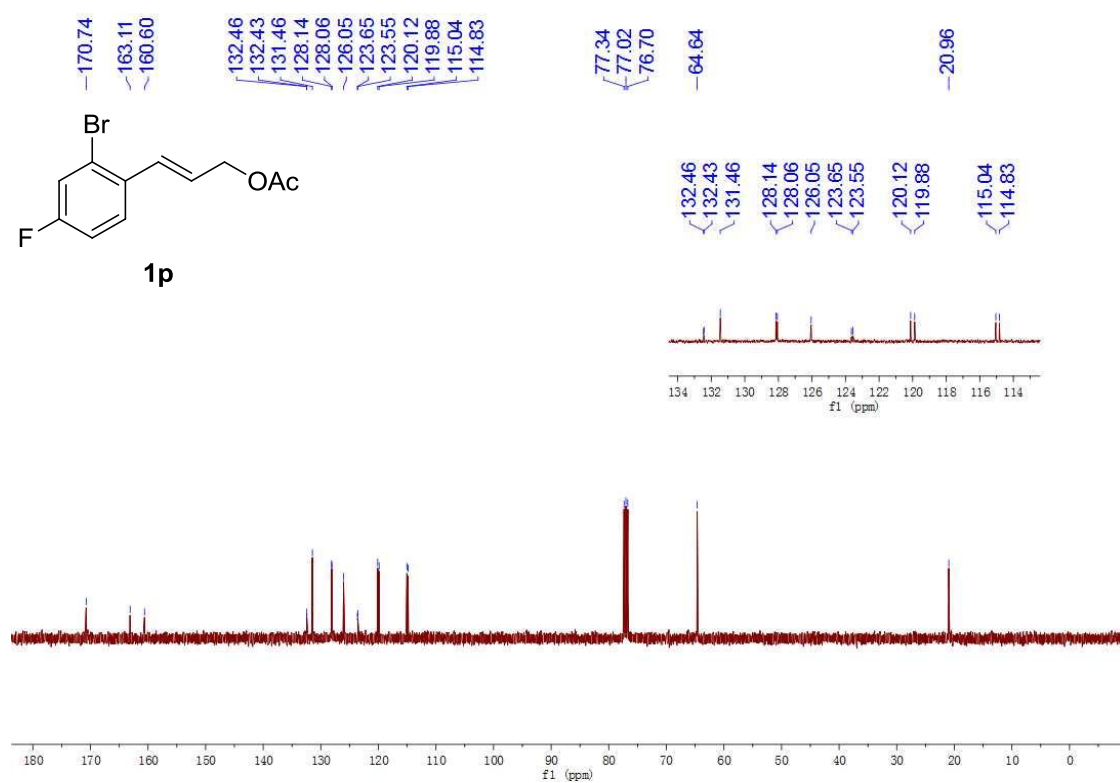



**$^{19}\text{F}$  NMR Spectrum of 1p ( $\text{CDCl}_3$ )**

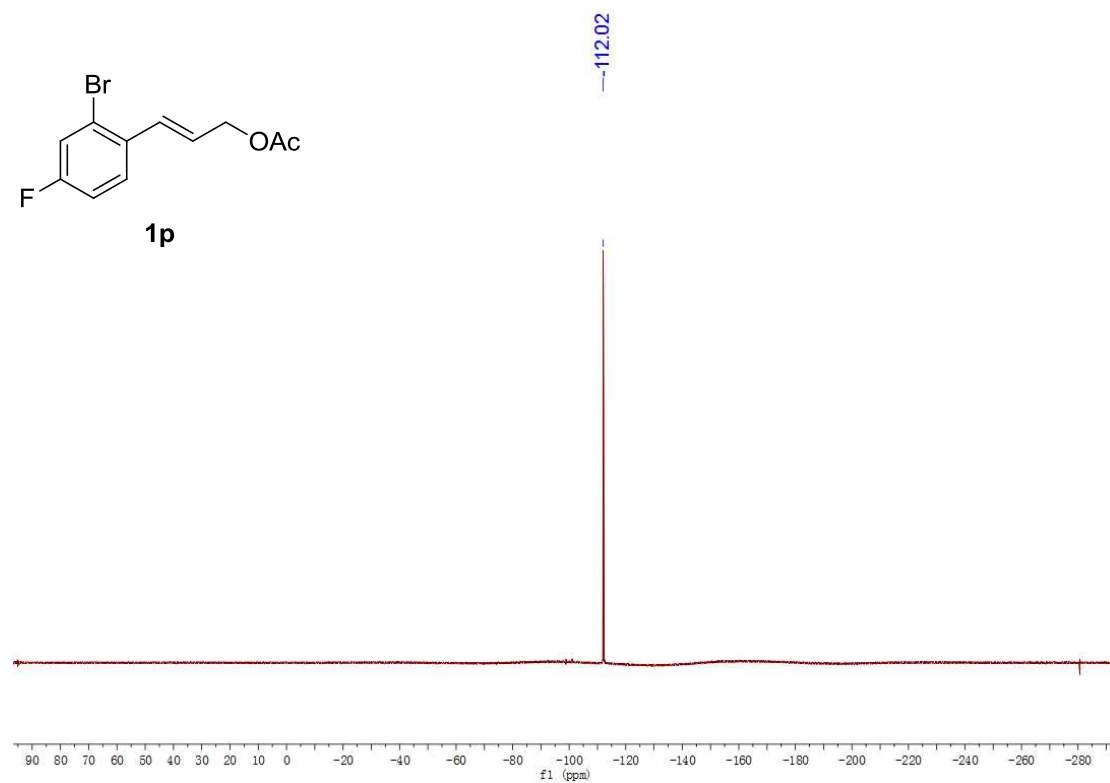

**$^1\text{H}$  NMR Spectrum of 1q ( $\text{CDCl}_3$ )**

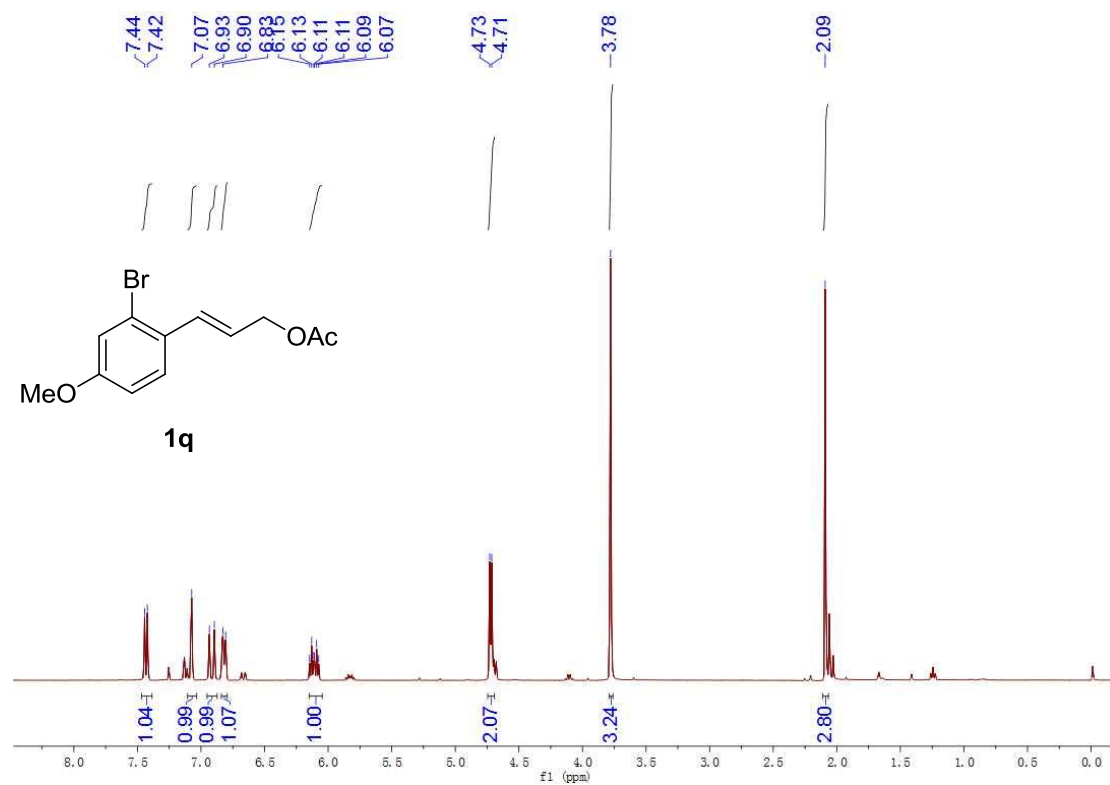

**$^{13}\text{C}$  NMR Spectrum of 1q ( $\text{CDCl}_3$ )**

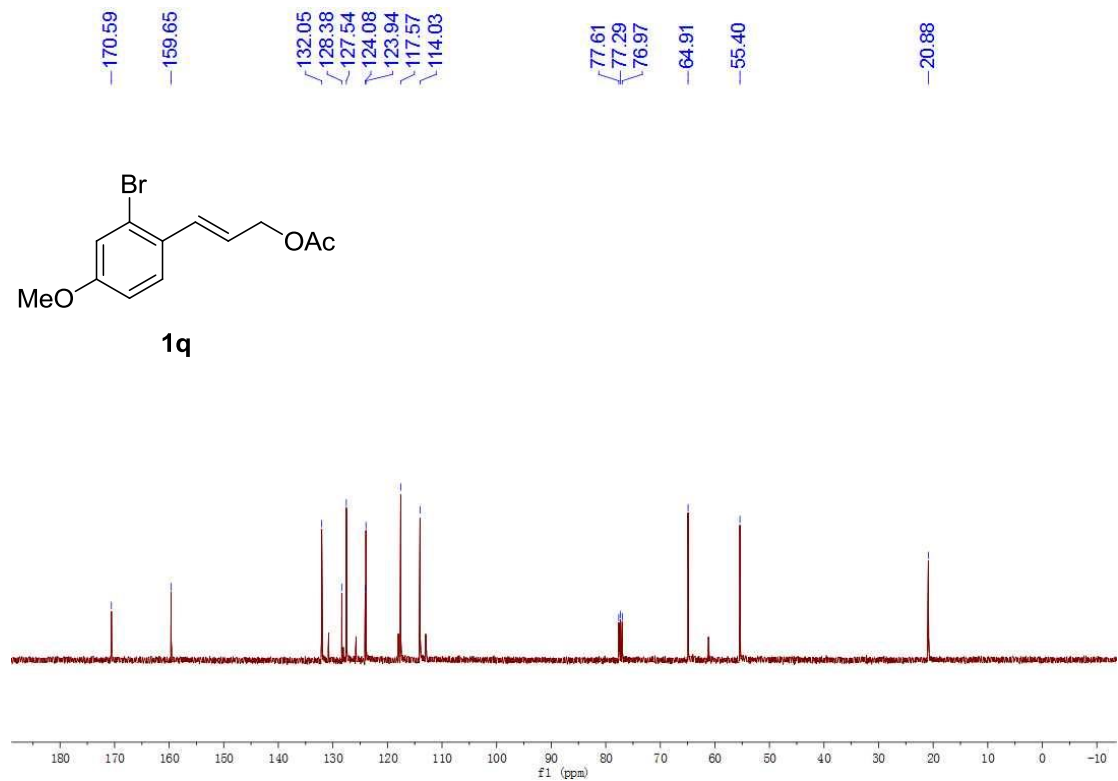

**$^1\text{H}$  NMR Spectrum of 1r ( $\text{CDCl}_3$ )**

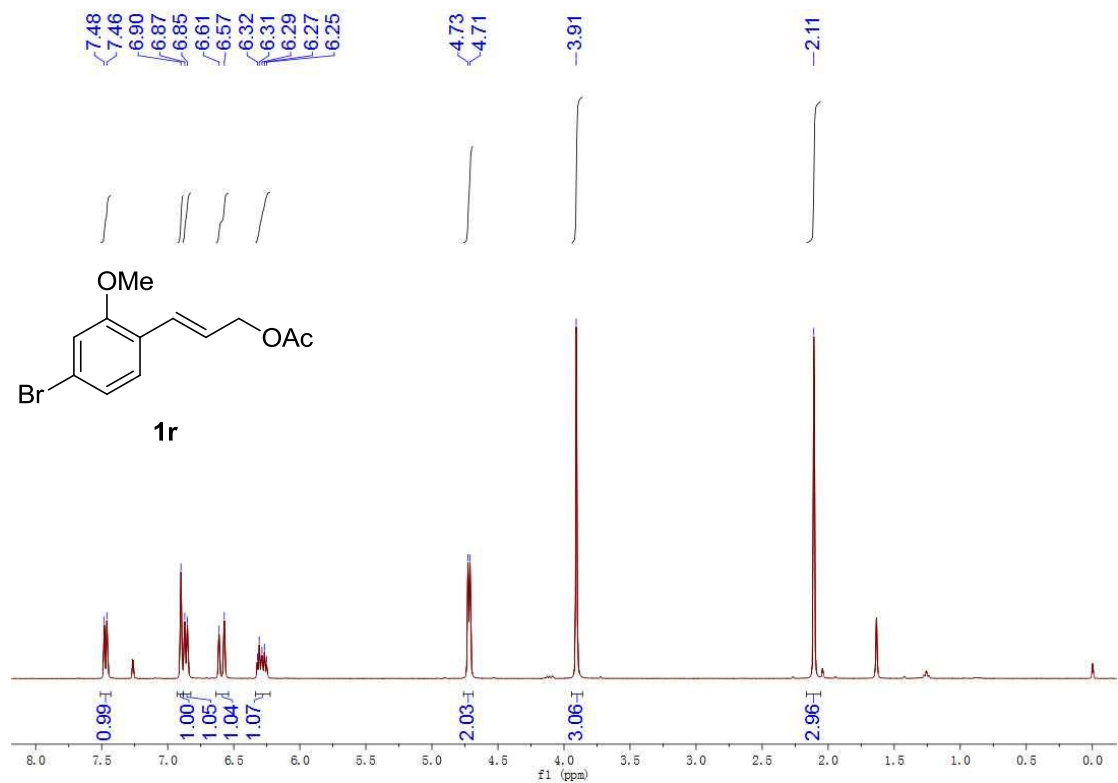

**<sup>13</sup>C NMR Spectrum of 1r (CDCl<sub>3</sub>)**

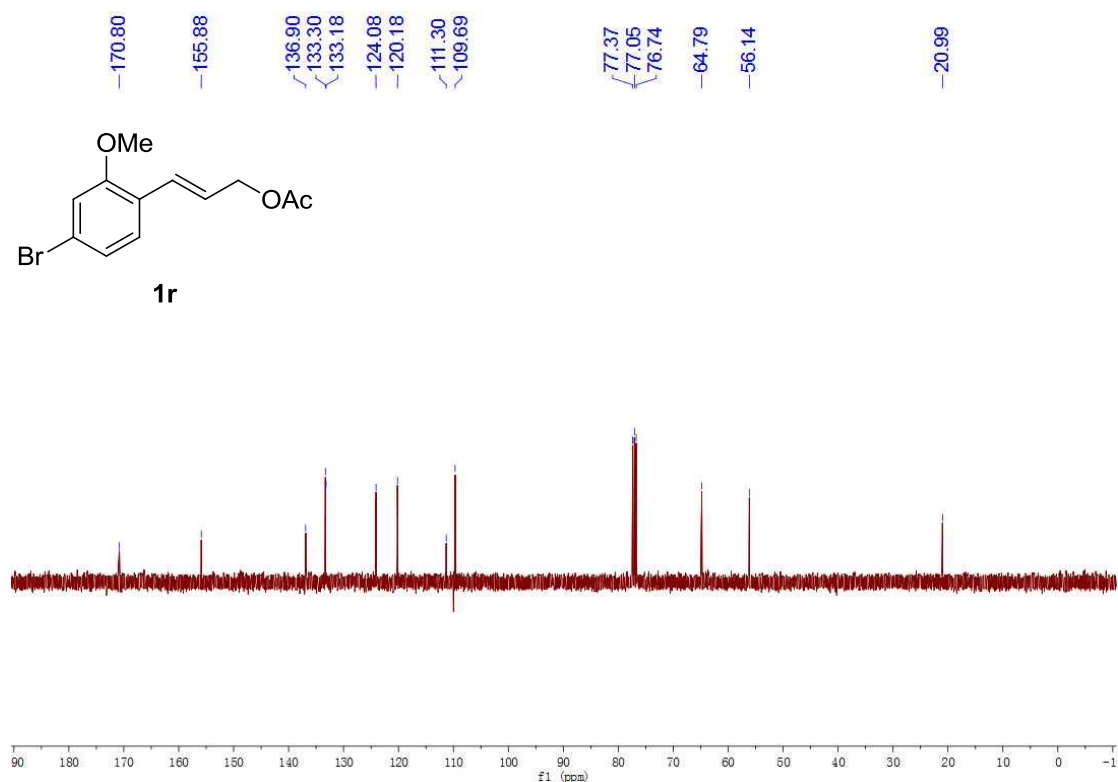

**<sup>1</sup>H NMR Spectrum of 1u (CDCl<sub>3</sub>)**

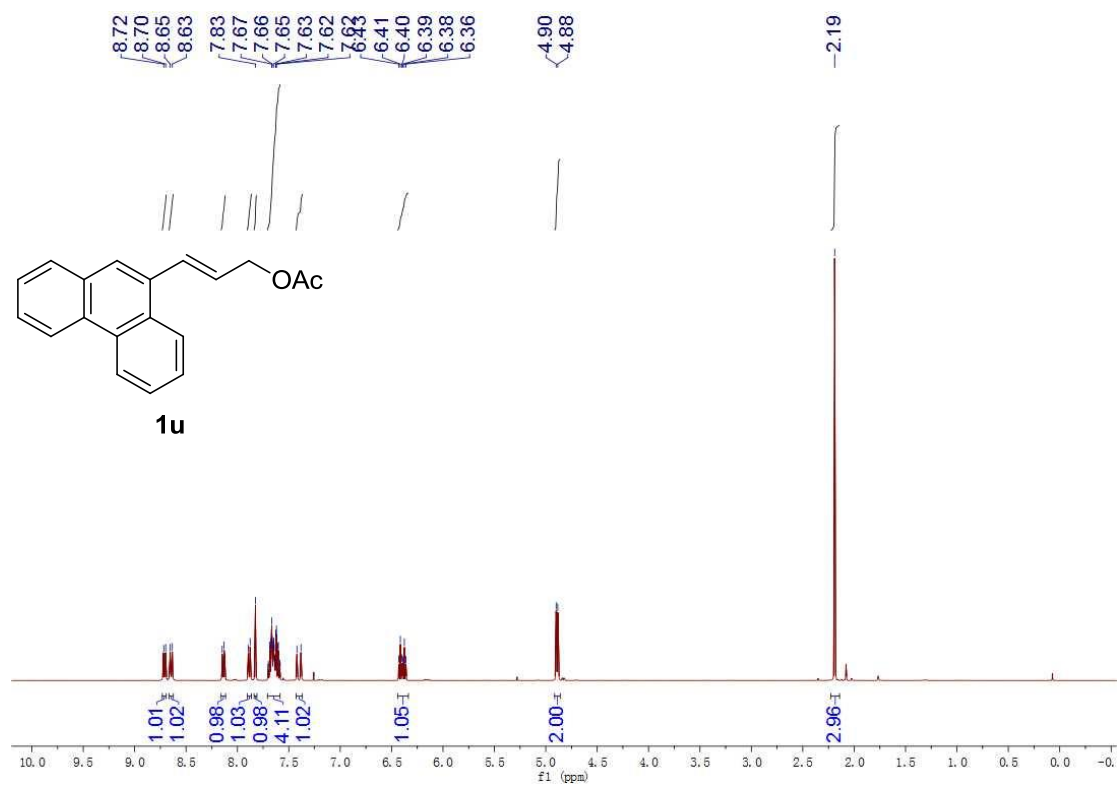

**$^{13}\text{C}$  NMR Spectrum of 1u ( $\text{CDCl}_3$ )**

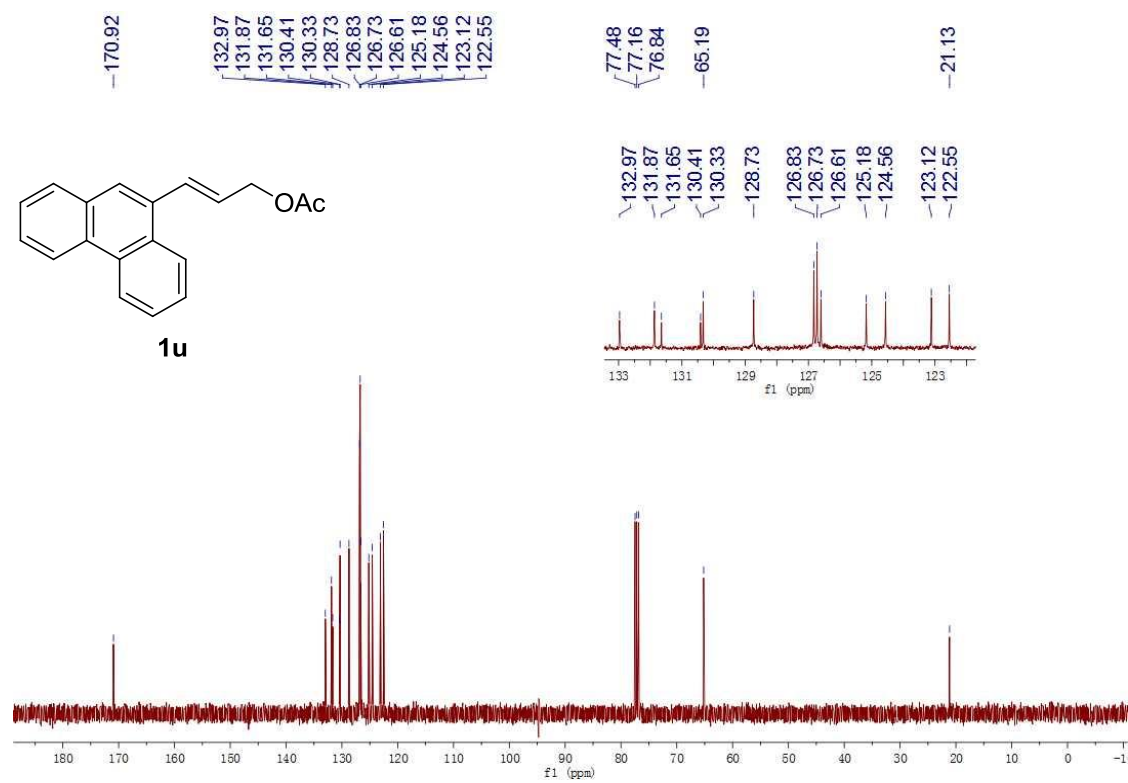

**<sup>1</sup>H NMR Spectrum of 2a (CDCl<sub>3</sub>)**

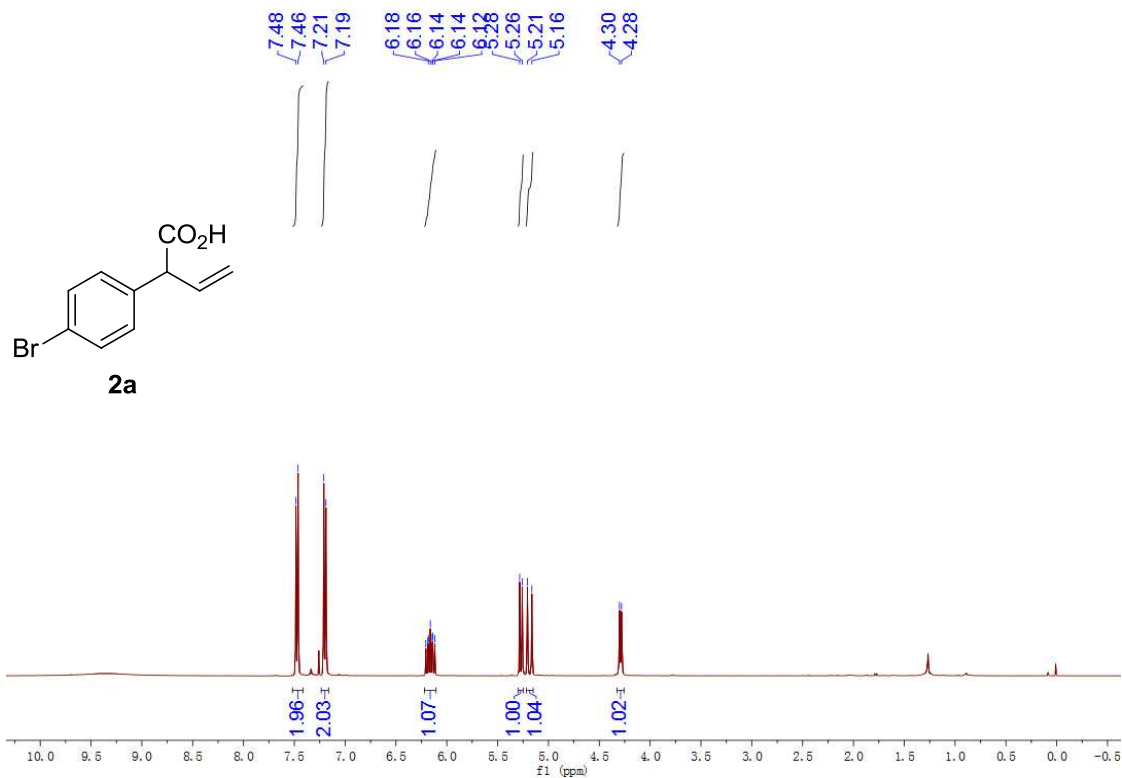

**<sup>13</sup>C NMR Spectrum of 2a (CDCl<sub>3</sub>)**

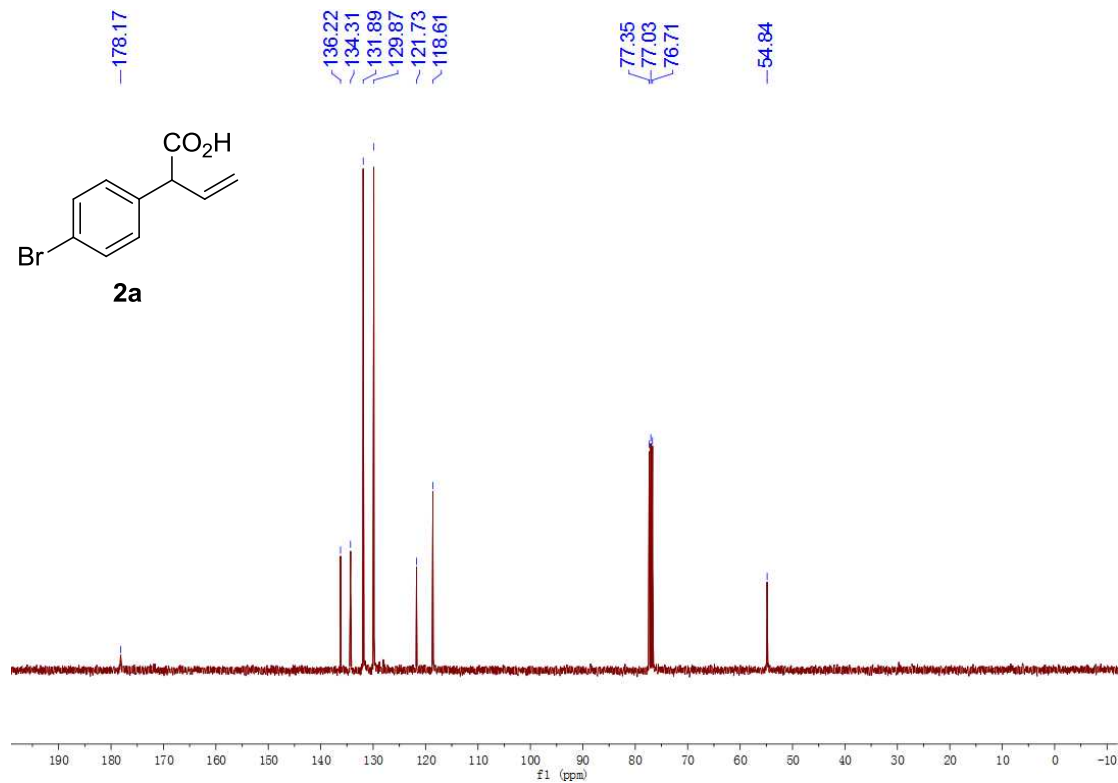

**<sup>1</sup>H NMR Spectrum of 2b (CDCl<sub>3</sub>)**

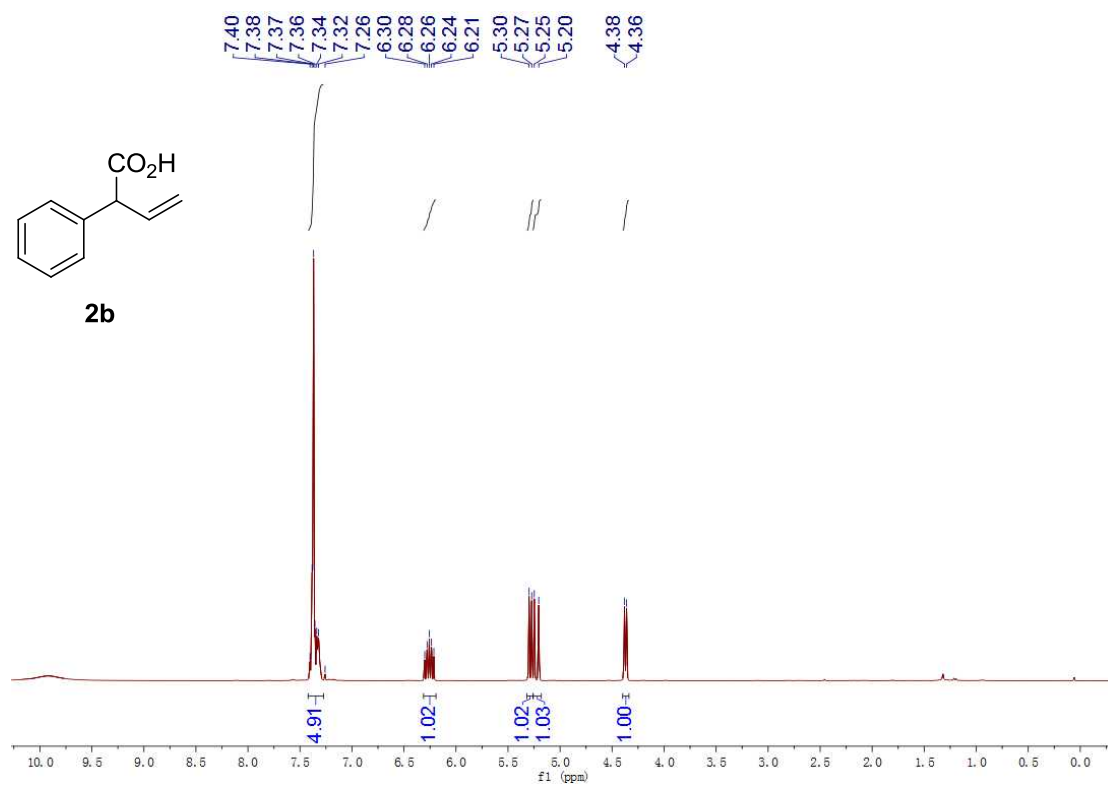

**<sup>13</sup>C NMR Spectrum of 2b (CDCl<sub>3</sub>)**

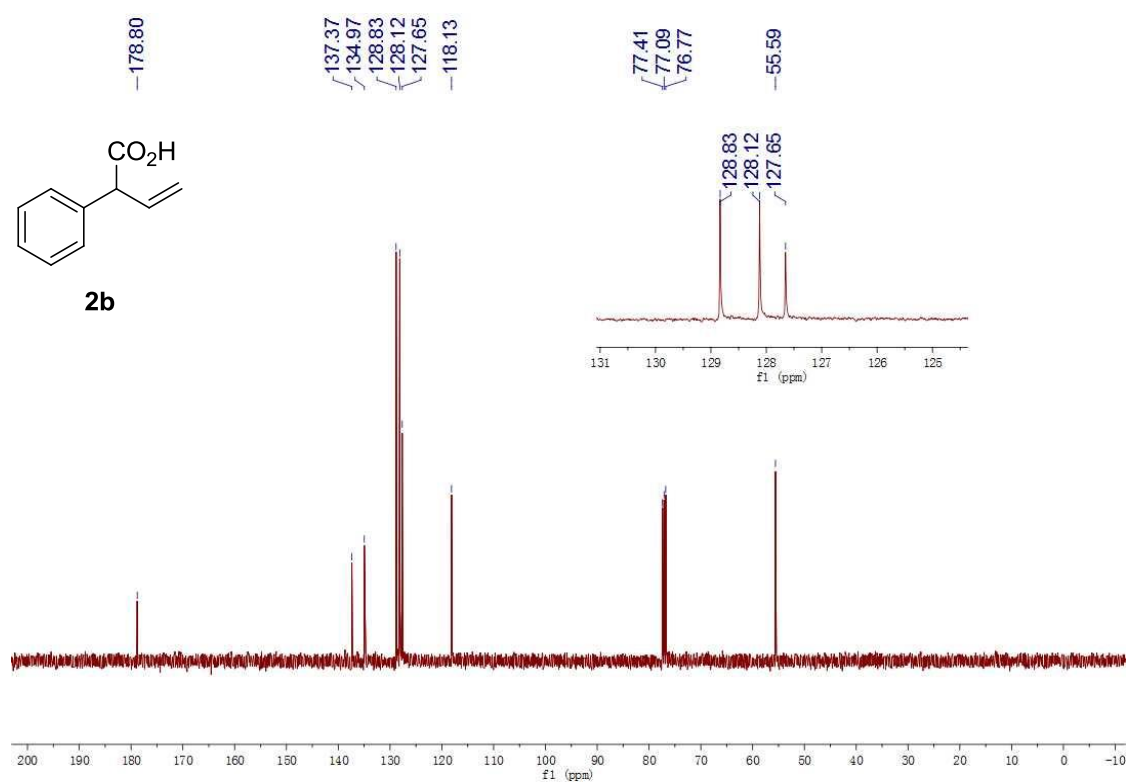

**<sup>1</sup>H NMR Spectrum of 2c (CDCl<sub>3</sub>)**

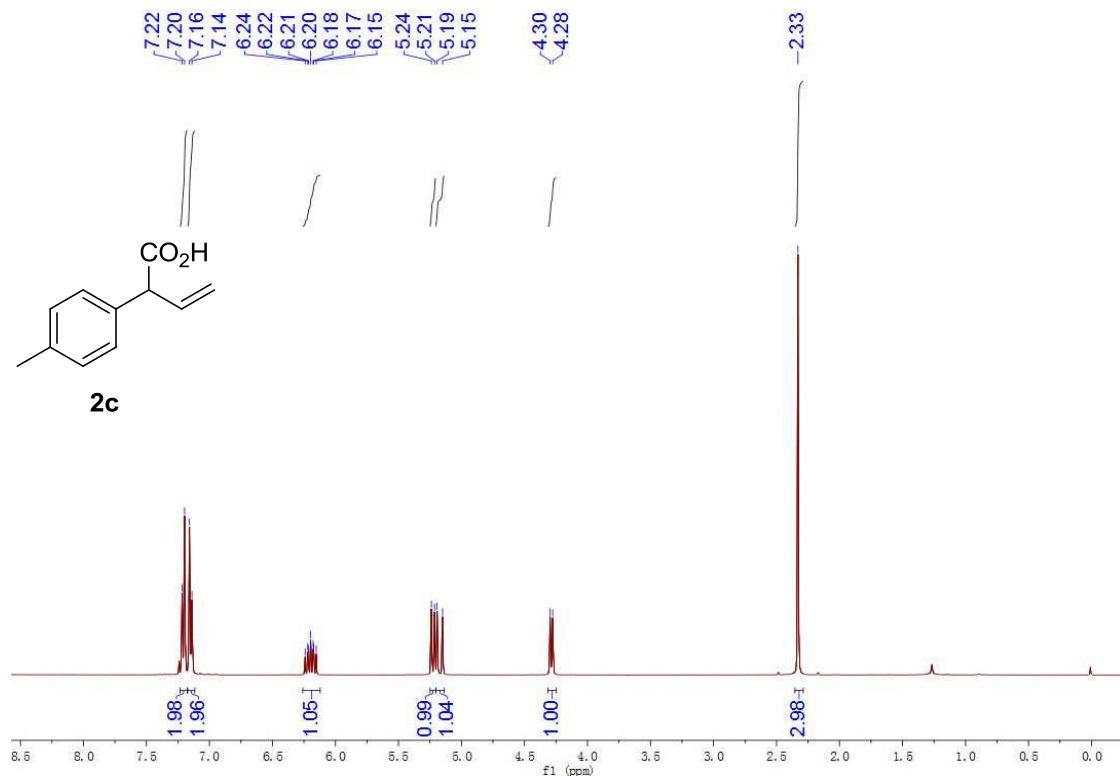

**<sup>13</sup>C NMR Spectrum of 2c (CDCl<sub>3</sub>)**

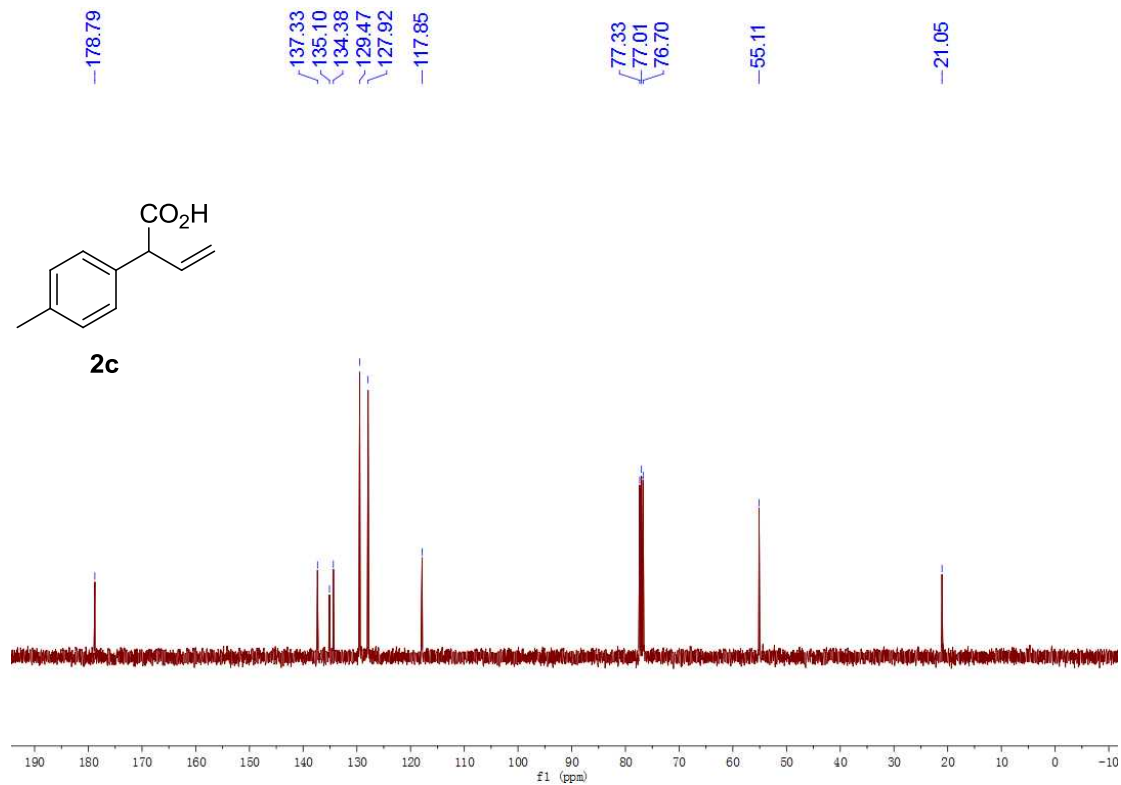

**<sup>1</sup>H NMR Spectrum of 2d (CDCl<sub>3</sub>)**

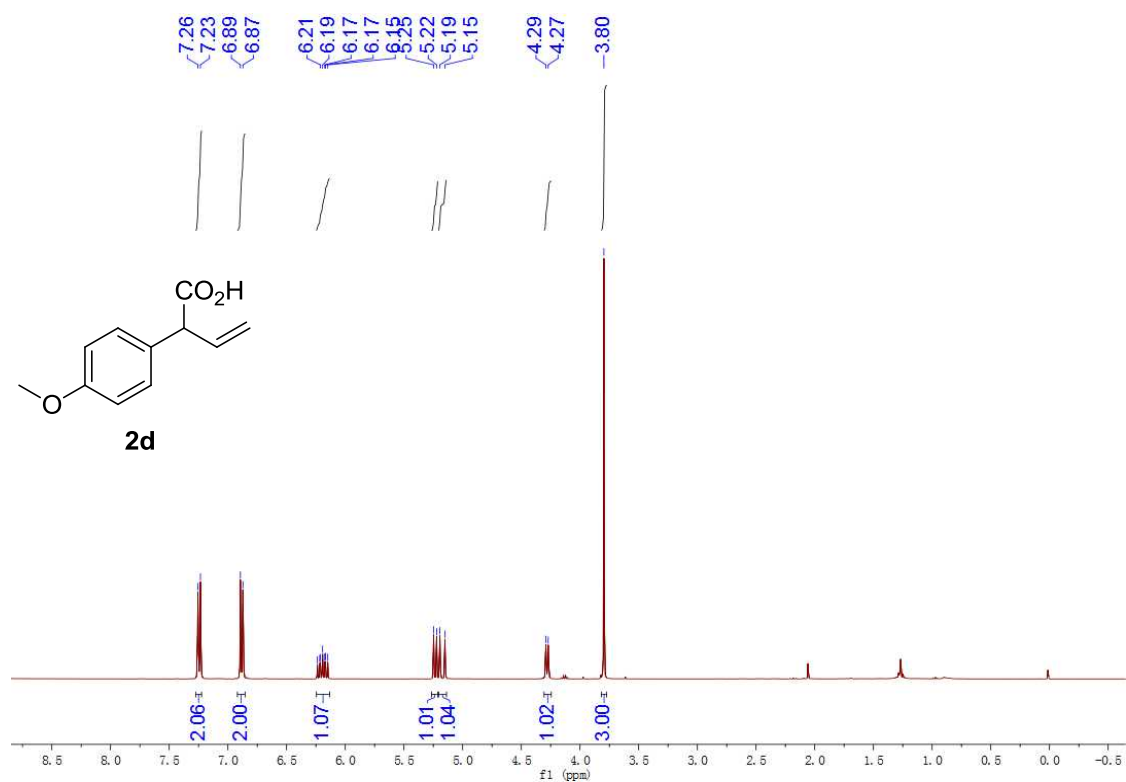

**<sup>13</sup>C NMR Spectrum of 2d (CDCl<sub>3</sub>)**

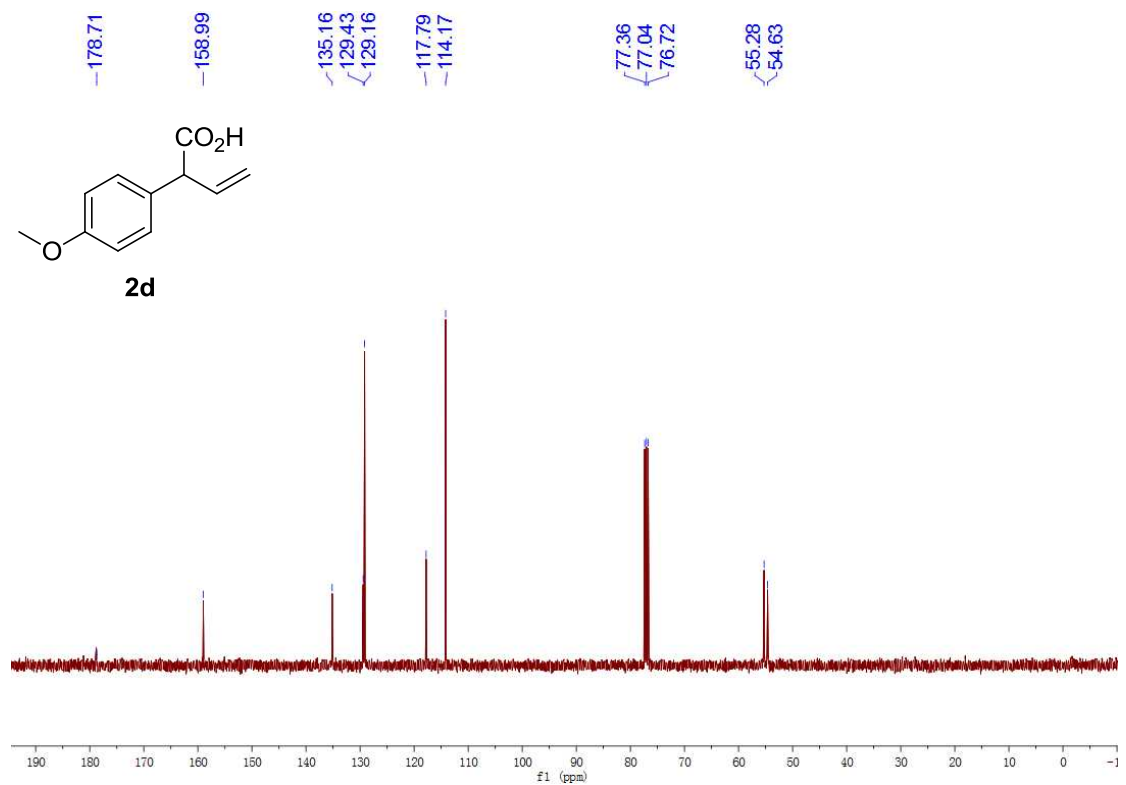



**<sup>1</sup>H NMR Spectrum of 2e (CDCl<sub>3</sub>)**

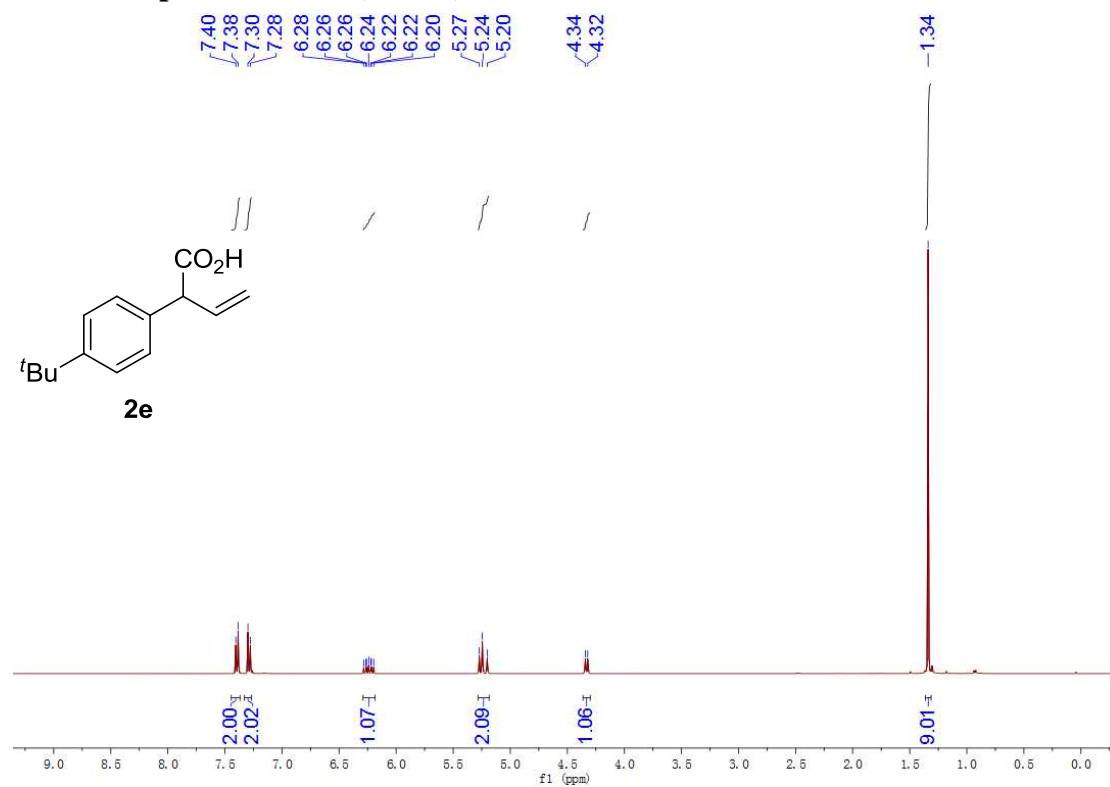

**<sup>13</sup>C NMR Spectrum of 2e (CDCl<sub>3</sub>)**

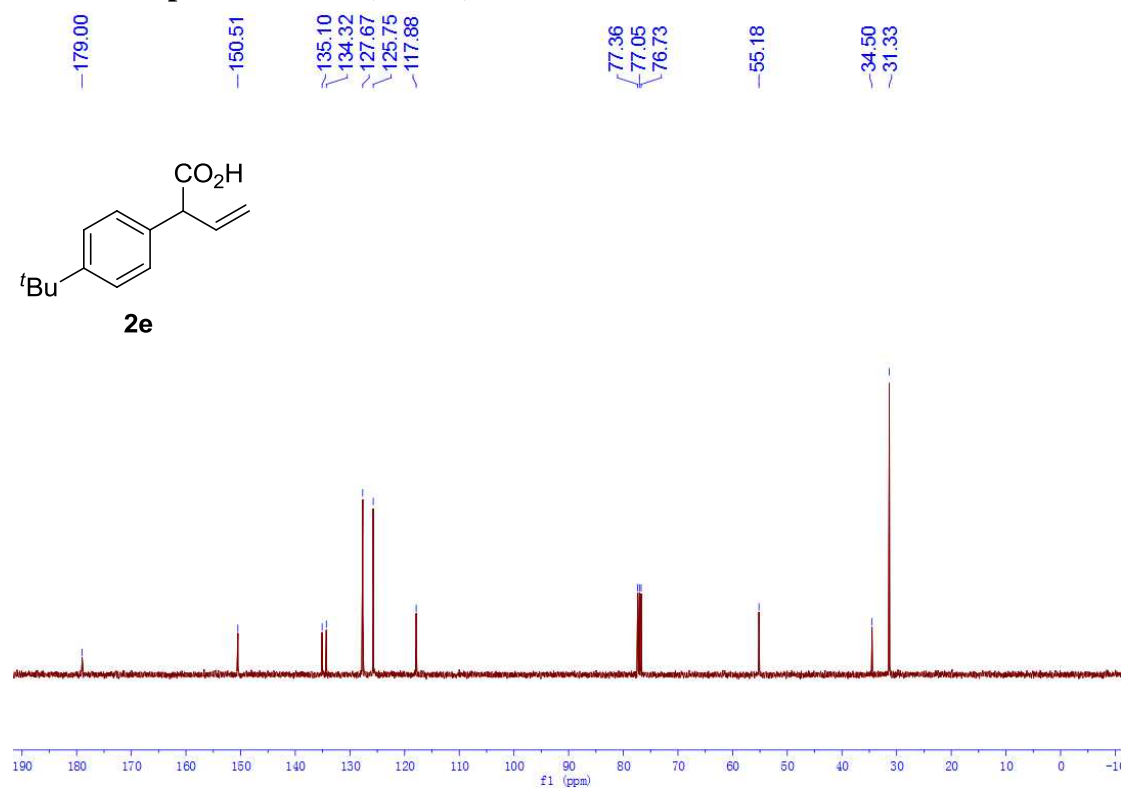

**<sup>1</sup>H NMR Spectrum of 2f (CDCl<sub>3</sub>)**

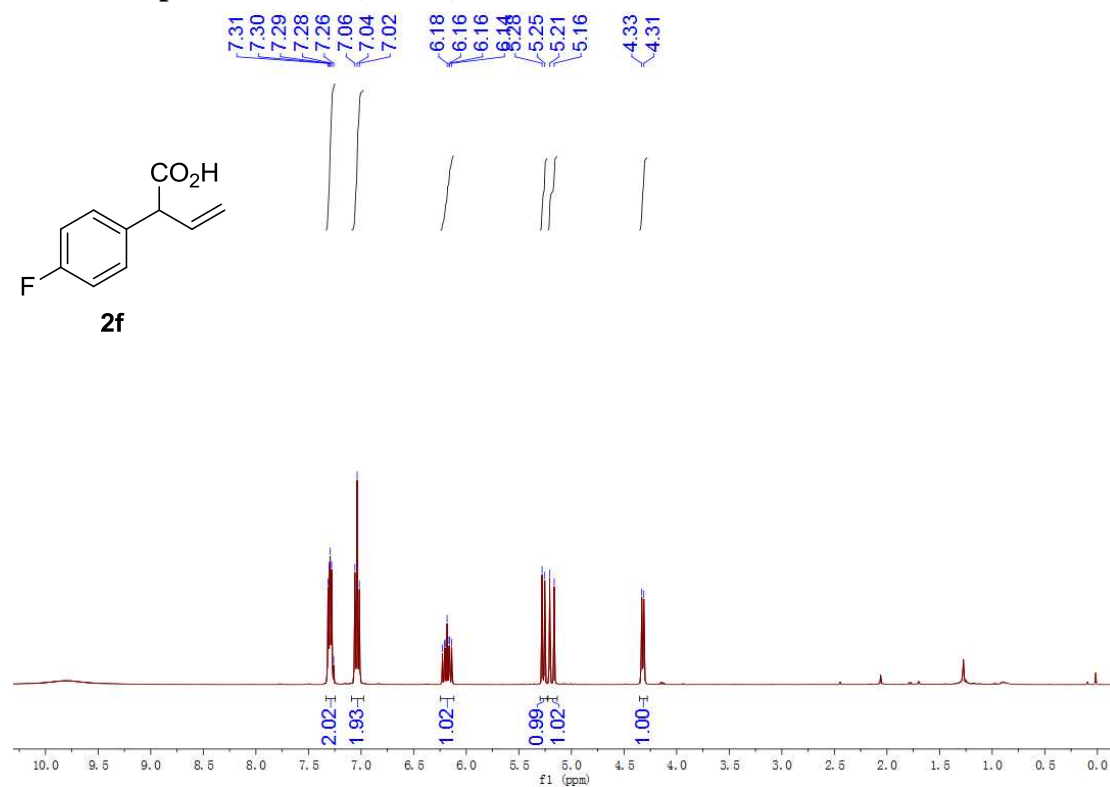

**<sup>13</sup>C NMR Spectrum of 2f (CDCl<sub>3</sub>)**

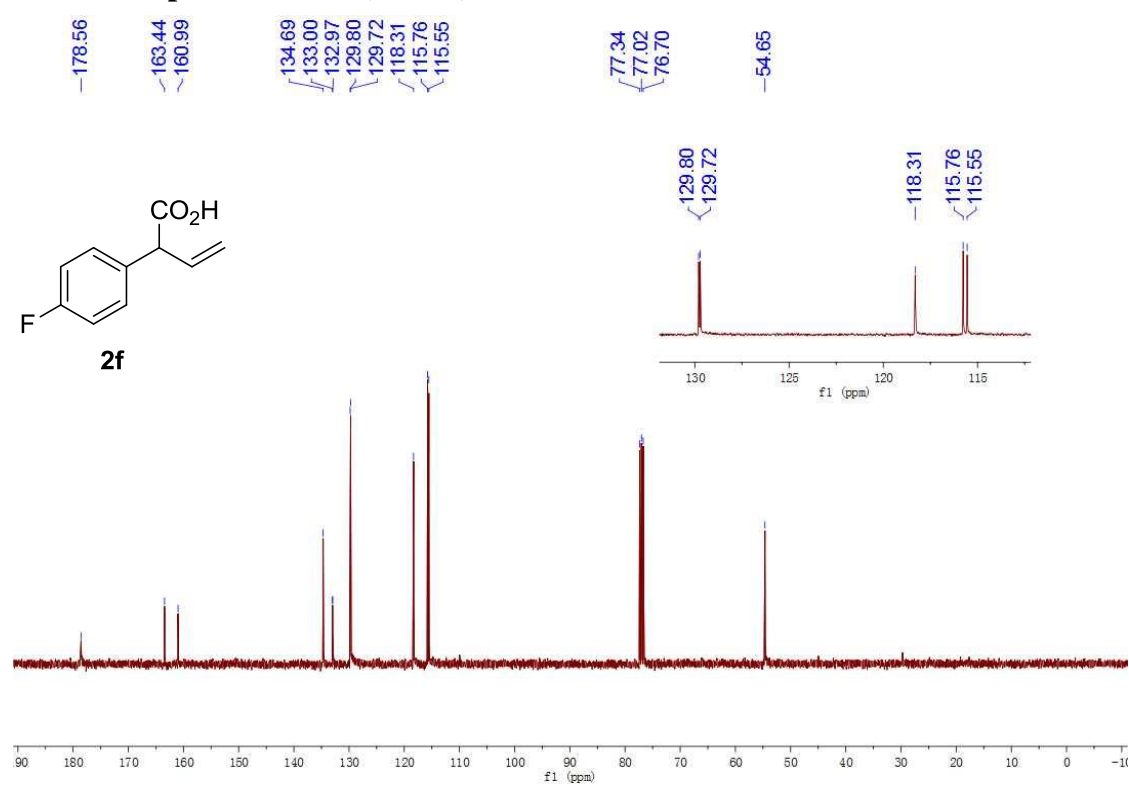

**$^{19}\text{F}$  NMR Spectrum of 2f ( $\text{CDCl}_3$ )**

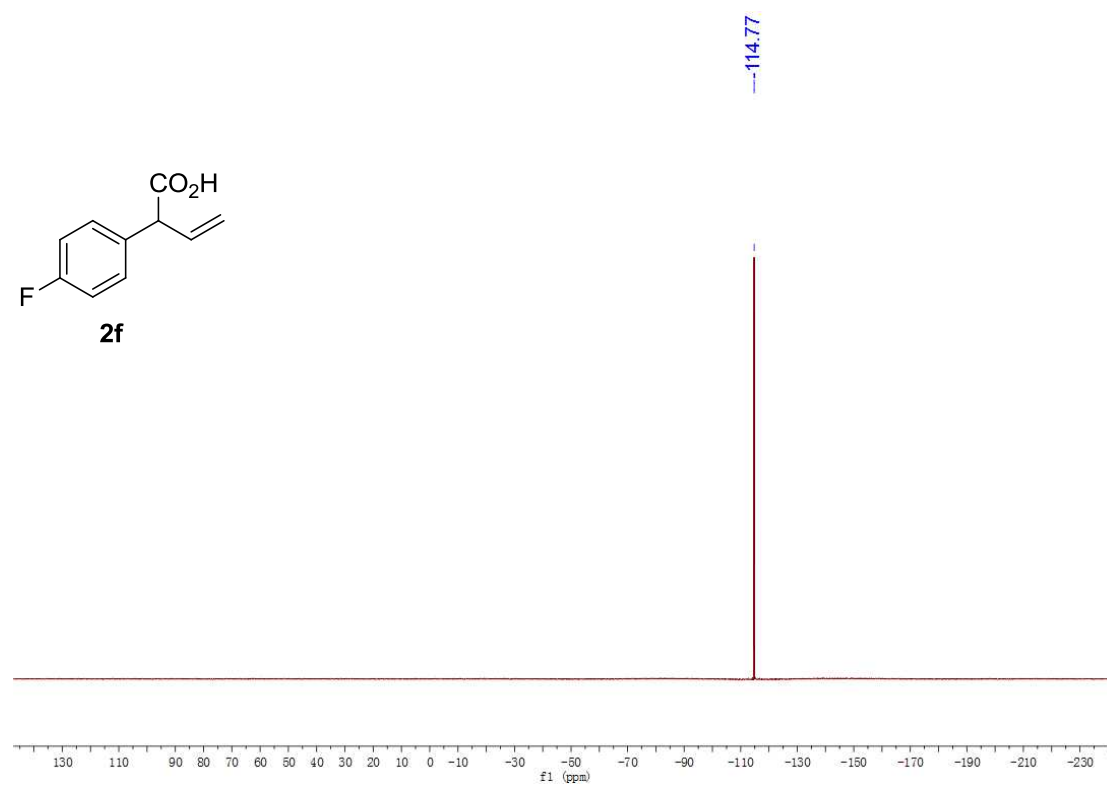

**$^1\text{H}$  NMR Spectrum of 2g ( $\text{CDCl}_3$ )**

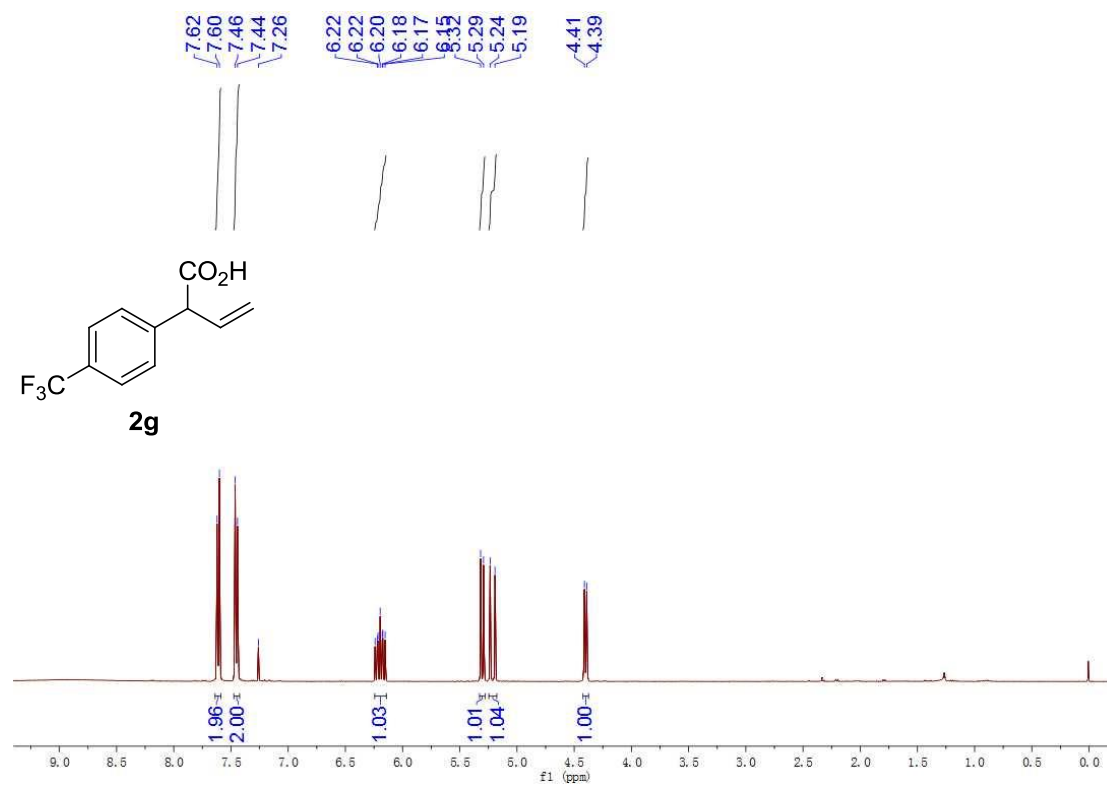

**<sup>13</sup>C NMR Spectrum of 2g (CDCl<sub>3</sub>)**

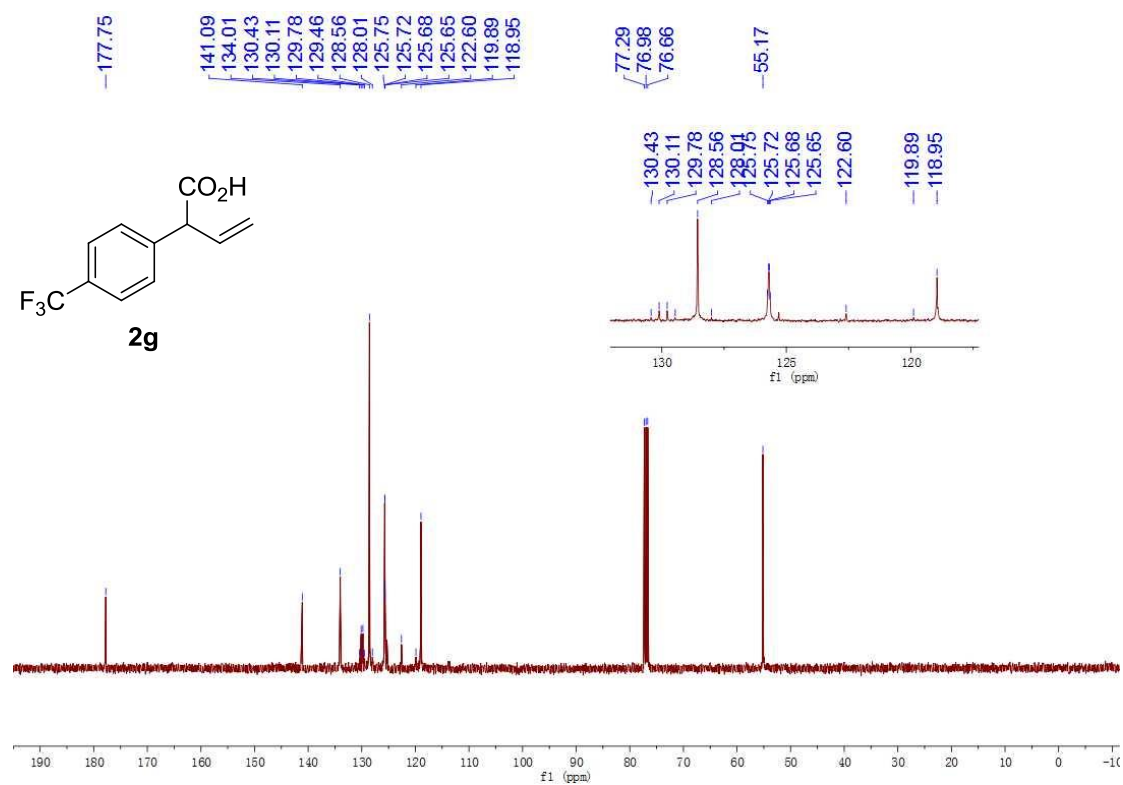

**<sup>19</sup>F NMR Spectrum of 2g (CDCl<sub>3</sub>)**

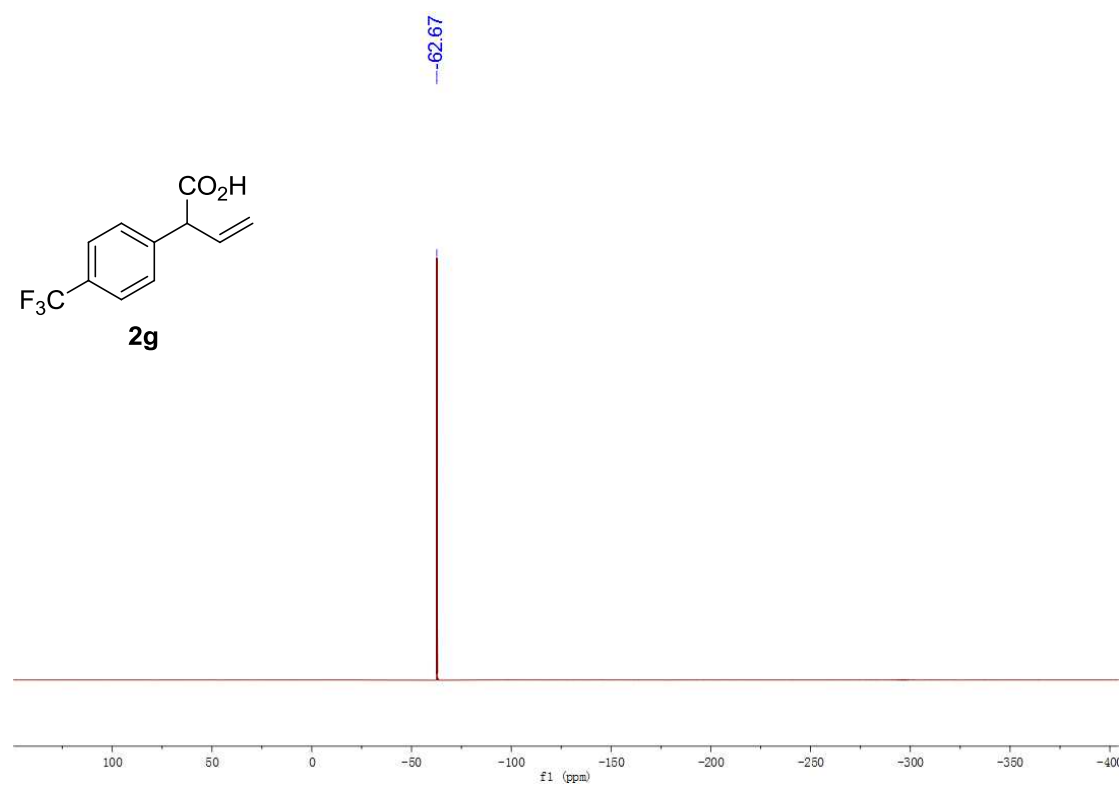

**$^1\text{H}$  NMR Spectrum of 2h ( $\text{CDCl}_3$ )**

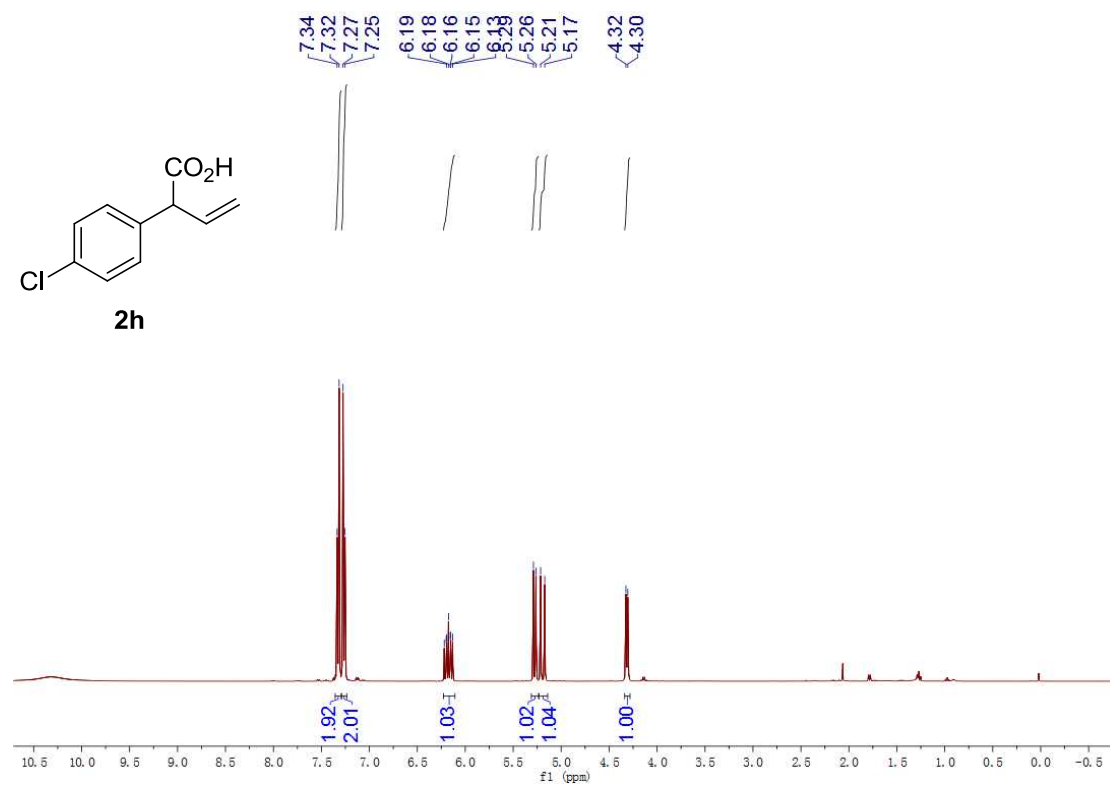

**$^{13}\text{C}$  NMR Spectrum of 2h ( $\text{CDCl}_3$ )**

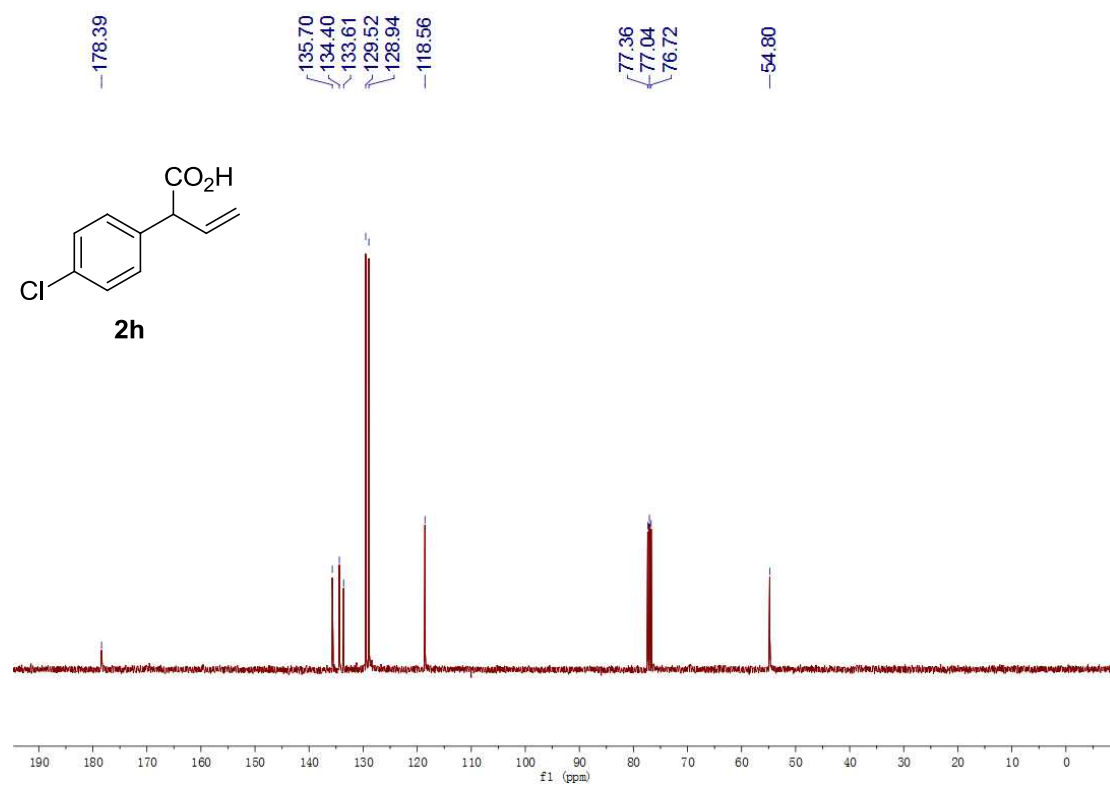

**<sup>1</sup>H NMR Spectrum of 2i (CDCl<sub>3</sub>)**

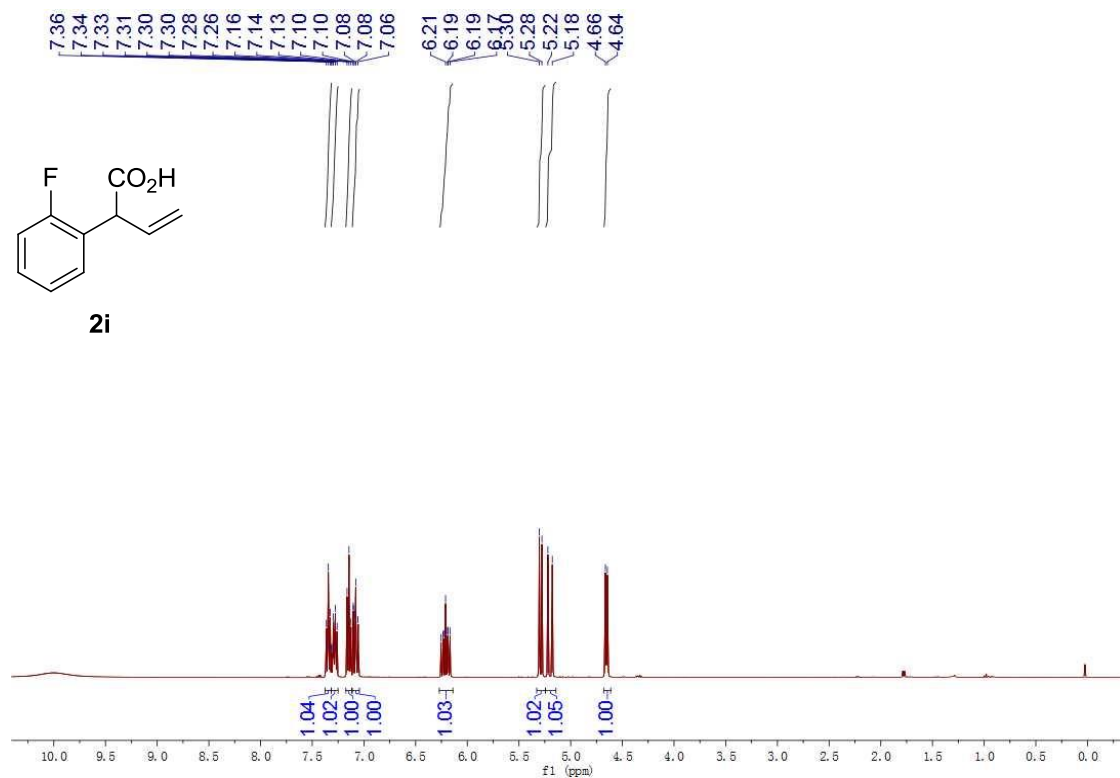

**<sup>13</sup>C NMR Spectrum of 2i (CDCl<sub>3</sub>)**

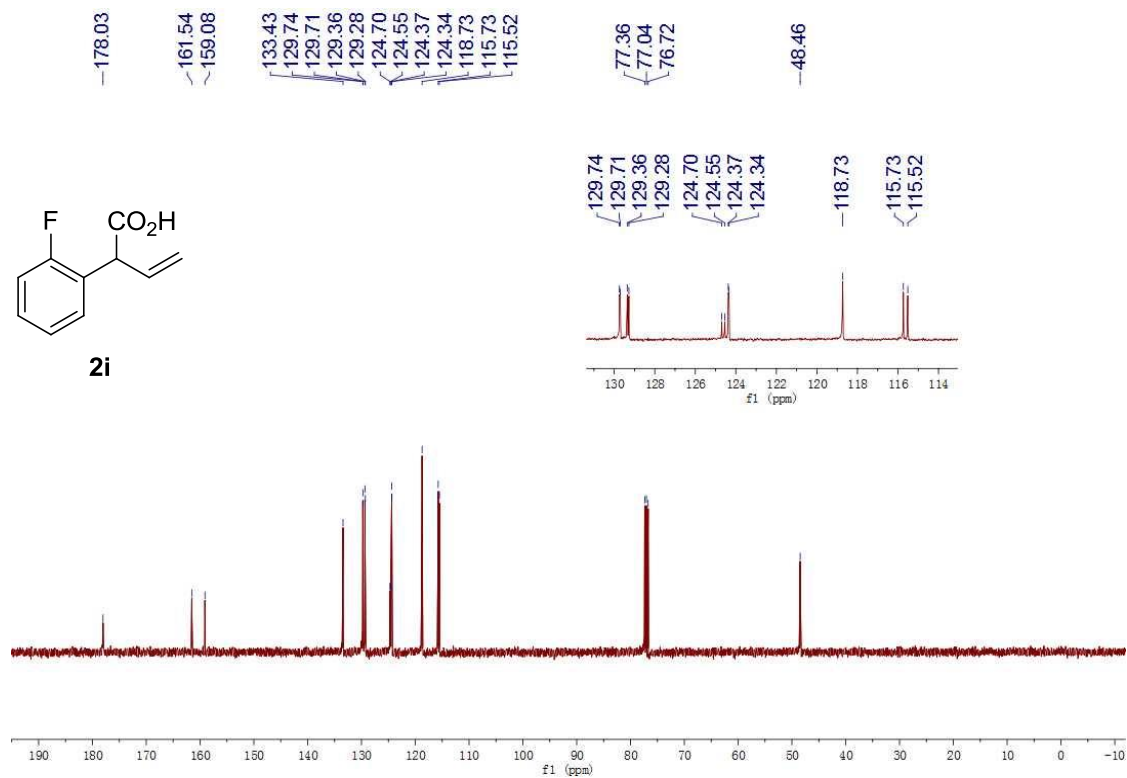

**$^{19}\text{F}$  NMR Spectrum of 2i ( $\text{CDCl}_3$ )**

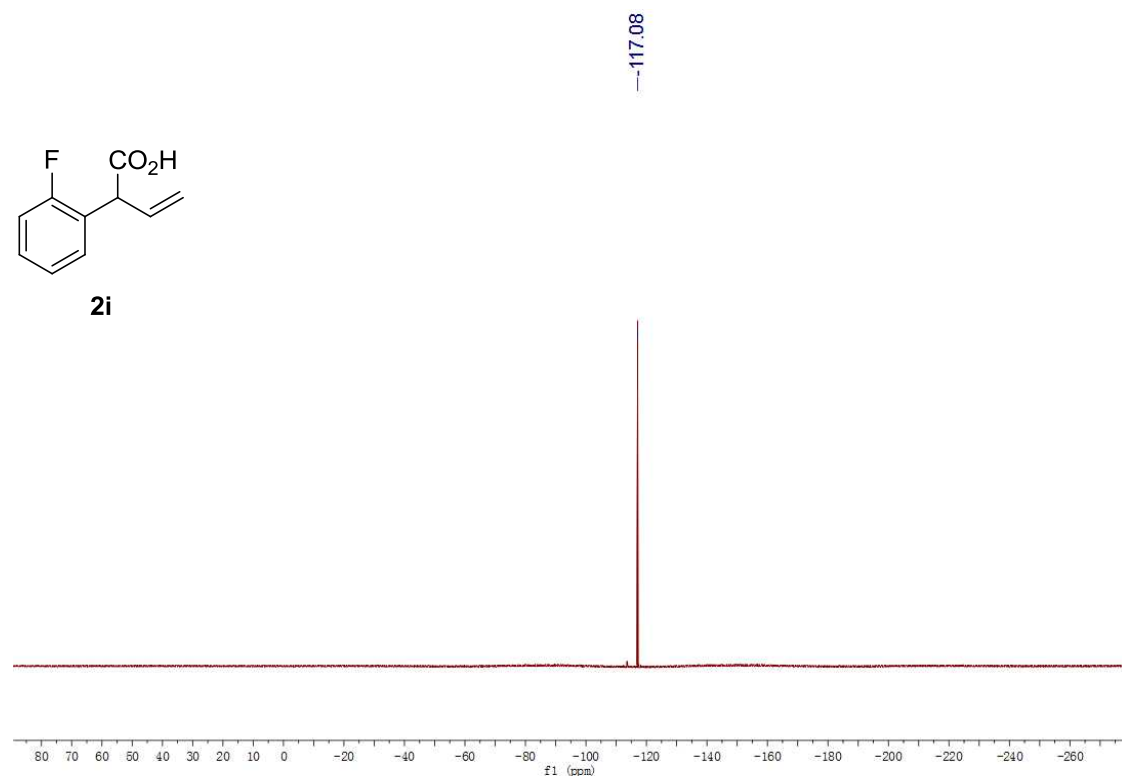

**$^1\text{H}$  NMR Spectrum of 2j ( $\text{CDCl}_3$ )**

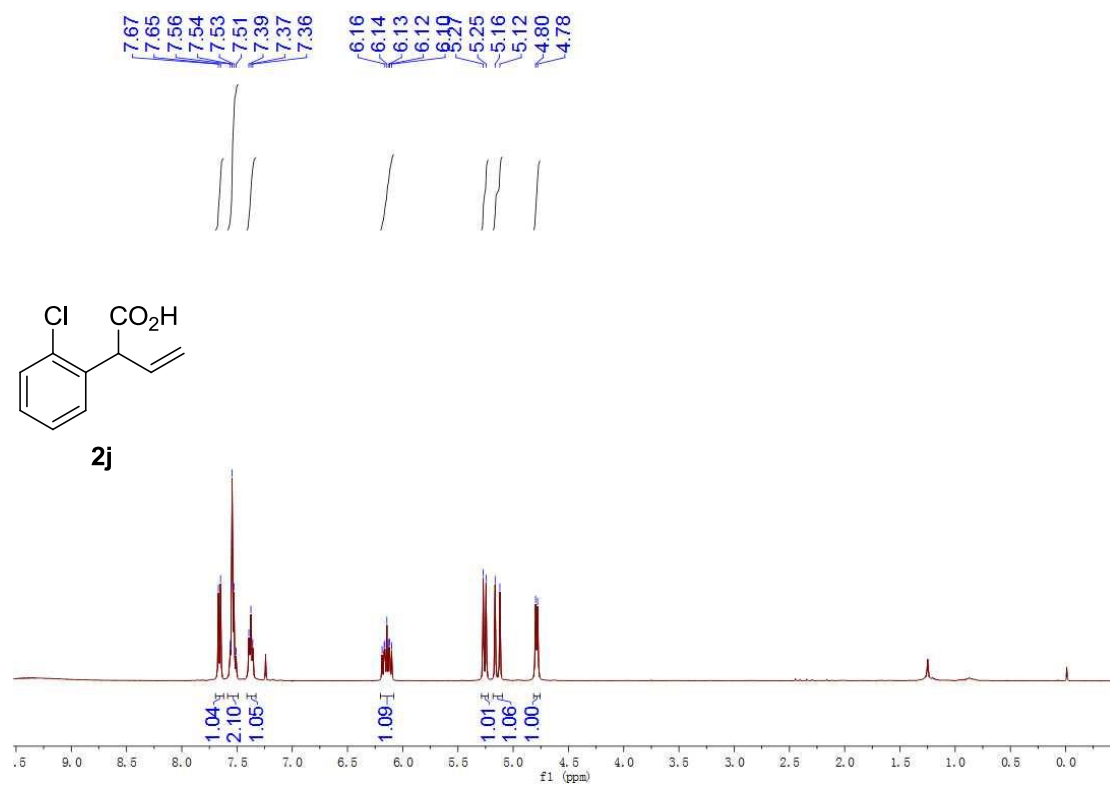

### <sup>13</sup>C NMR Spectrum of 2j (CDCl<sub>3</sub>)

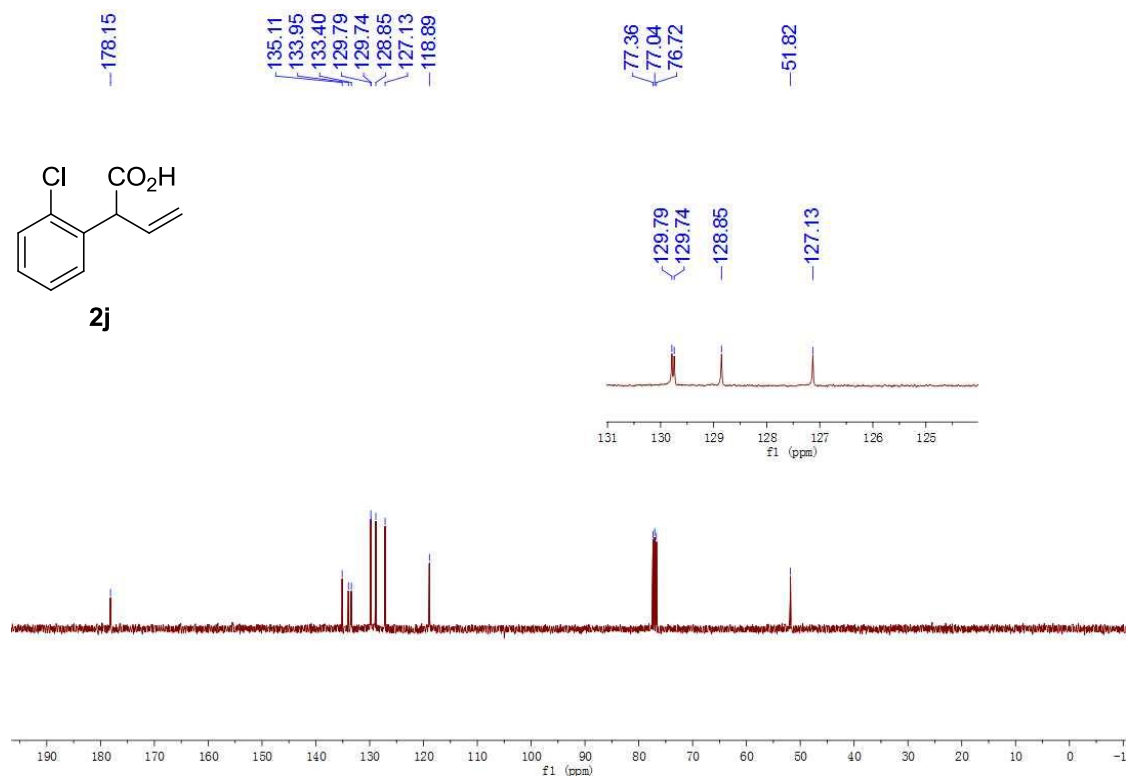

### <sup>1</sup>H NMR Spectrum of 2k (CDCl<sub>3</sub>)

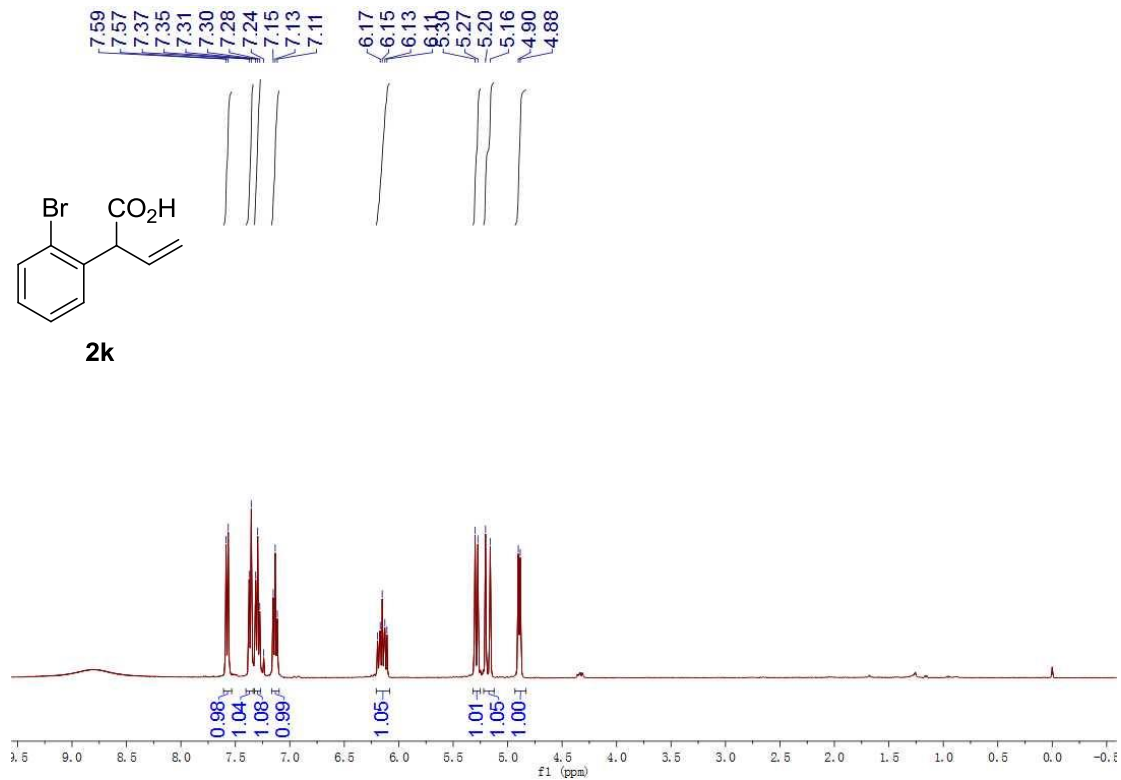



**$^{13}\text{C}$  NMR Spectrum of 2k ( $\text{CDCl}_3$ )**

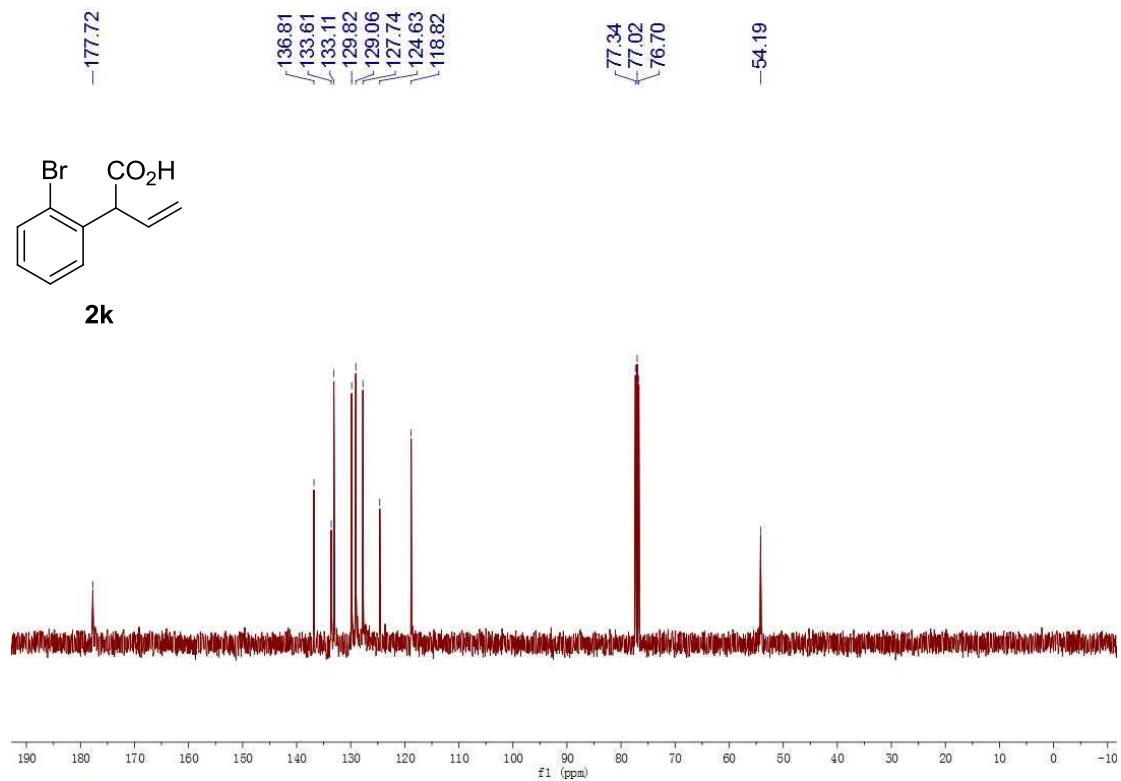

**$^1\text{H}$  NMR Spectrum of 2l ( $\text{CDCl}_3$ )**

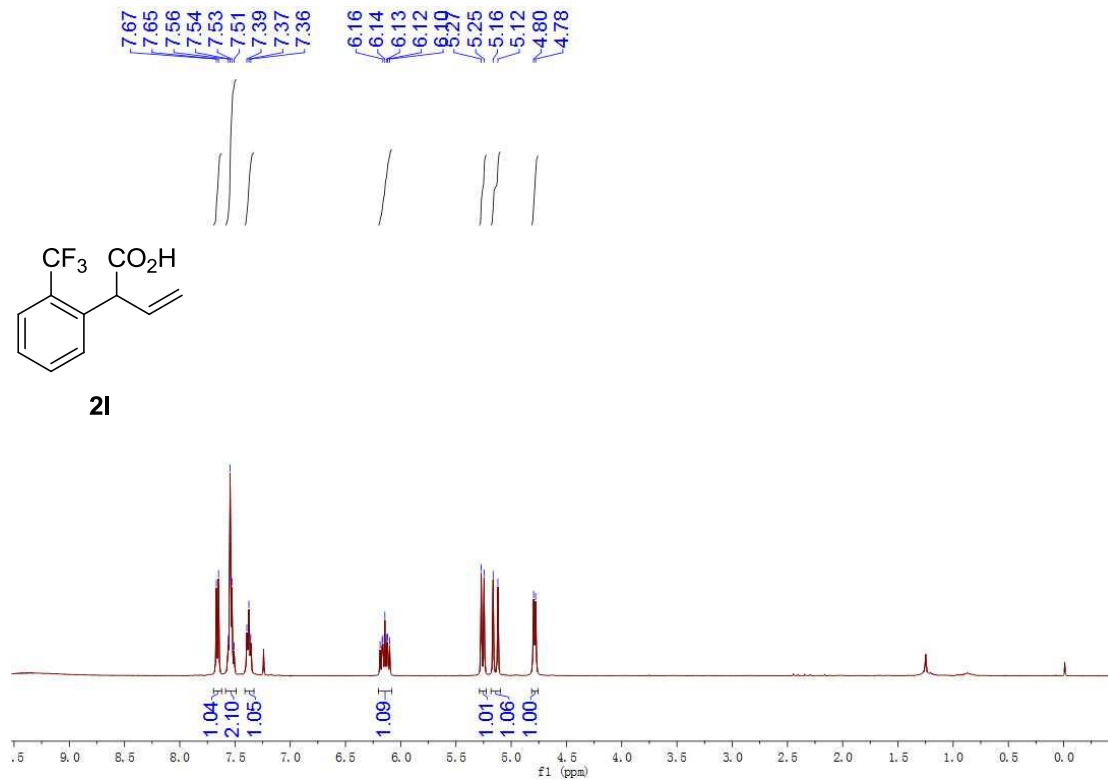

**$^{13}\text{C}$  NMR Spectrum of 2I ( $\text{CDCl}_3$ )**

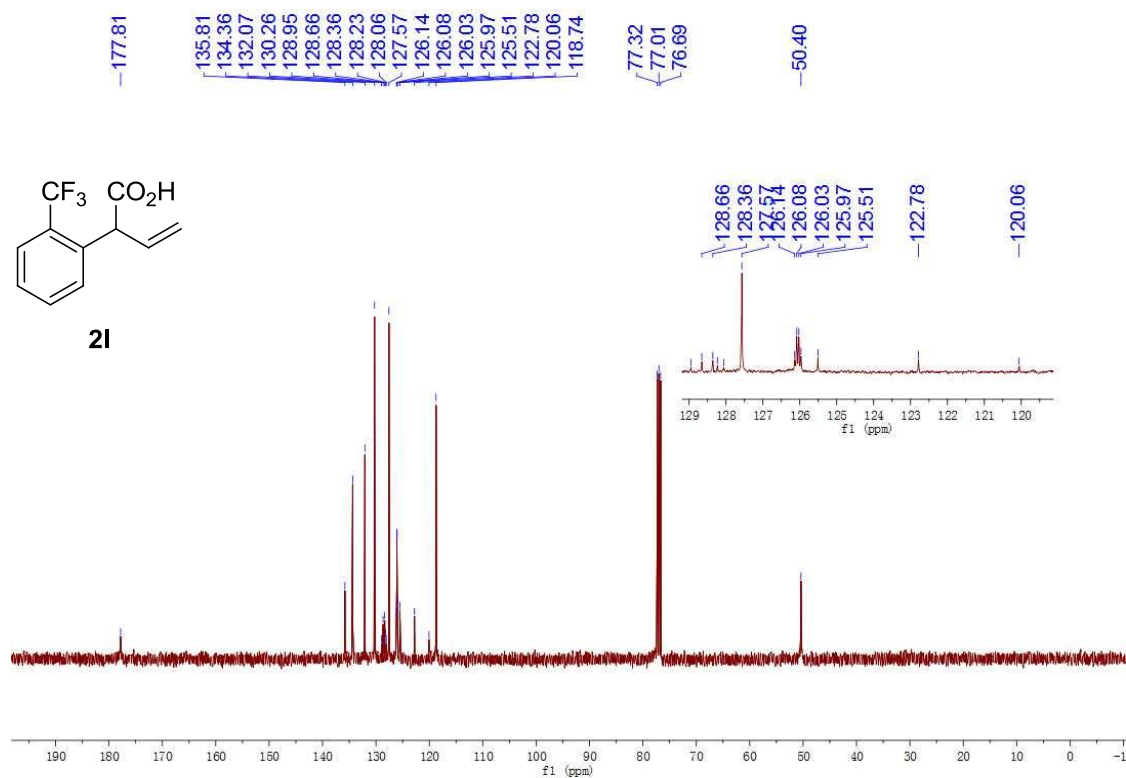

**$^{19}\text{F}$  NMR Spectrum of 2I ( $\text{CDCl}_3$ )**

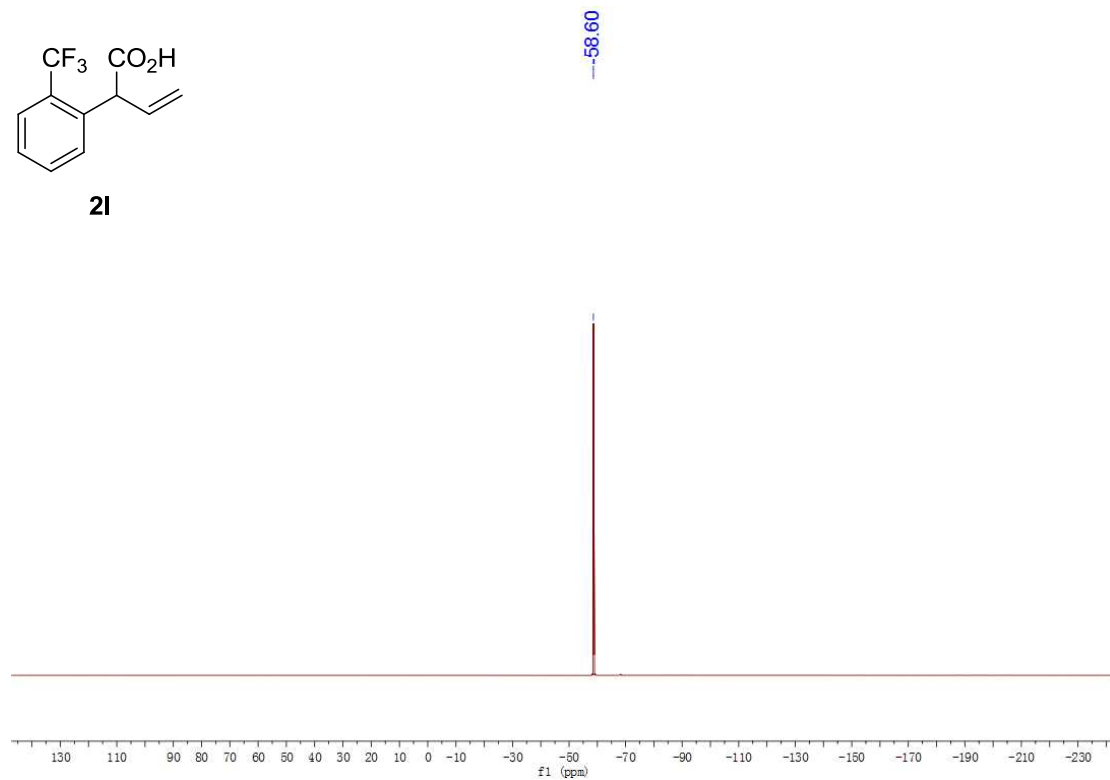

# <sup>1</sup>H NMR Spectrum of 2m (CDCl<sub>3</sub>)

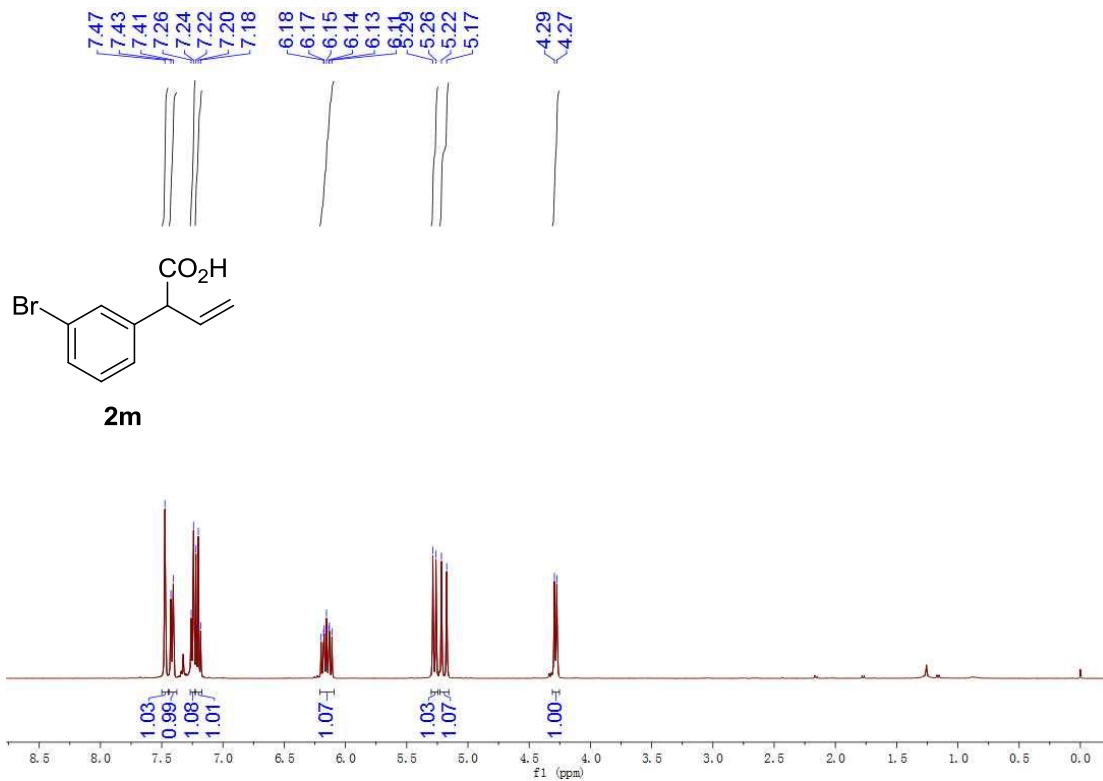

# <sup>13</sup>C NMR Spectrum of 2m (CDCl<sub>3</sub>)

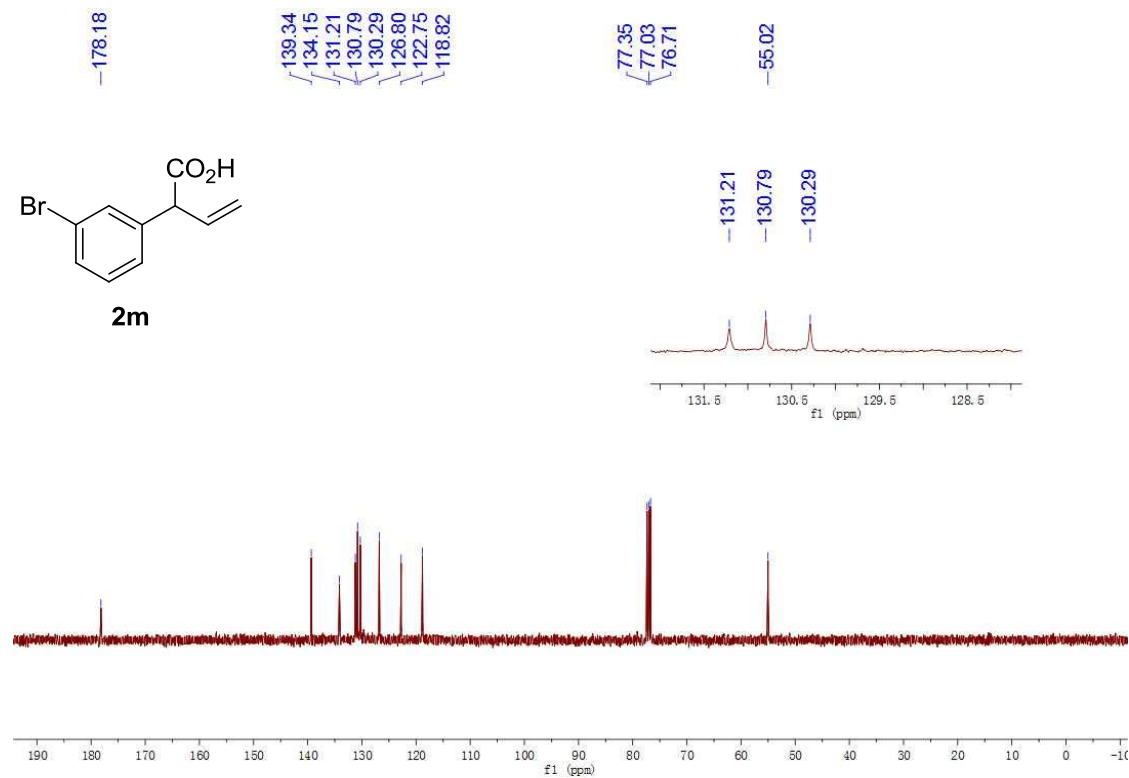

**<sup>1</sup>H NMR Spectrum of 2n (CDCl<sub>3</sub>)**

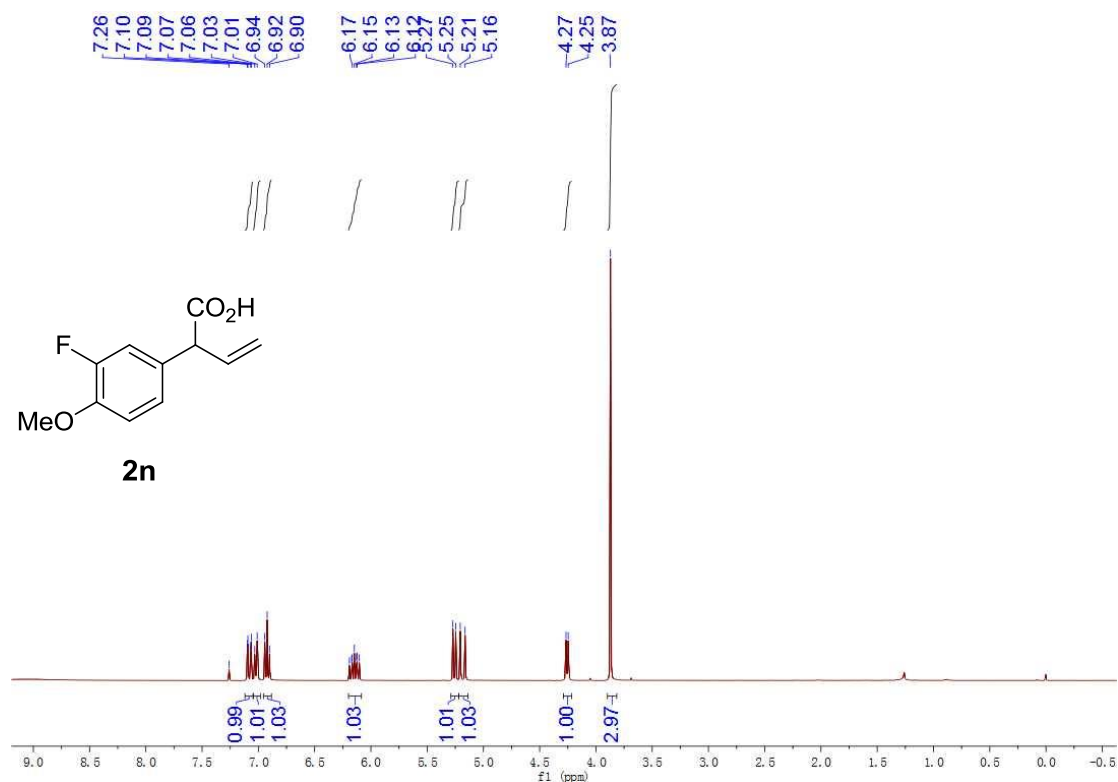

**<sup>13</sup>C NMR Spectrum of 2n (CDCl<sub>3</sub>)**

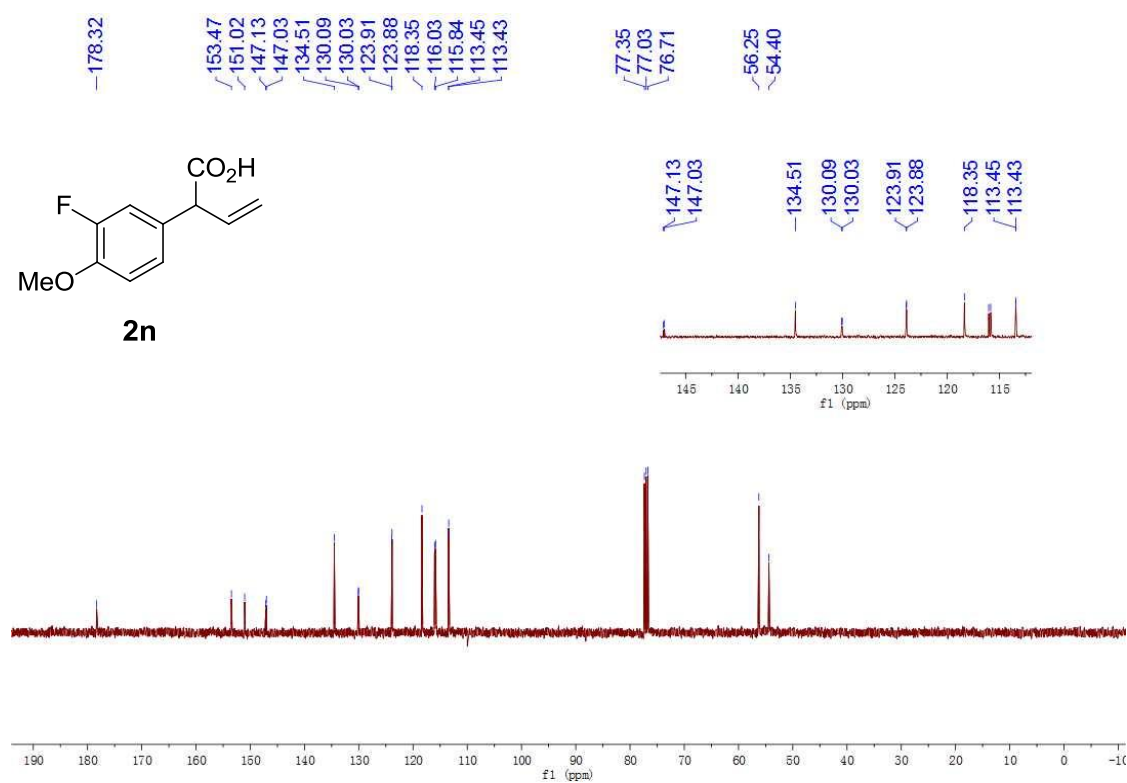

**$^{19}\text{F}$  NMR Spectrum of 2n ( $\text{CDCl}_3$ )**

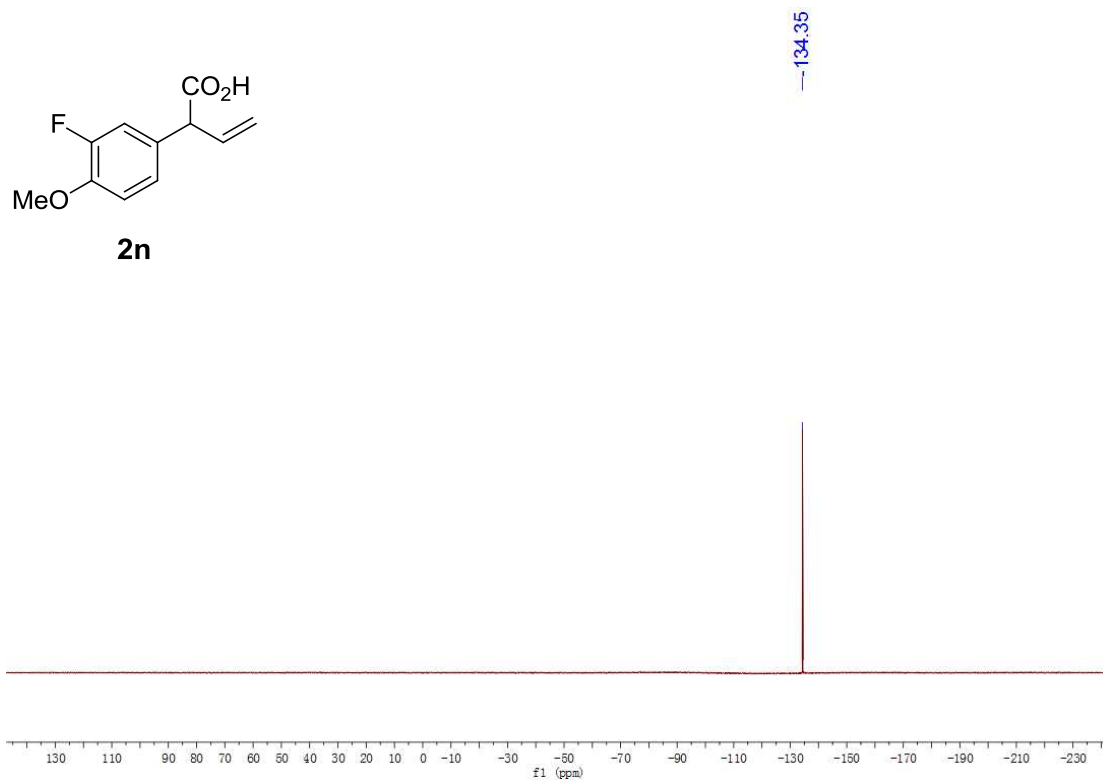

**$^1\text{H}$  NMR Spectrum of 2o ( $\text{CDCl}_3$ )**

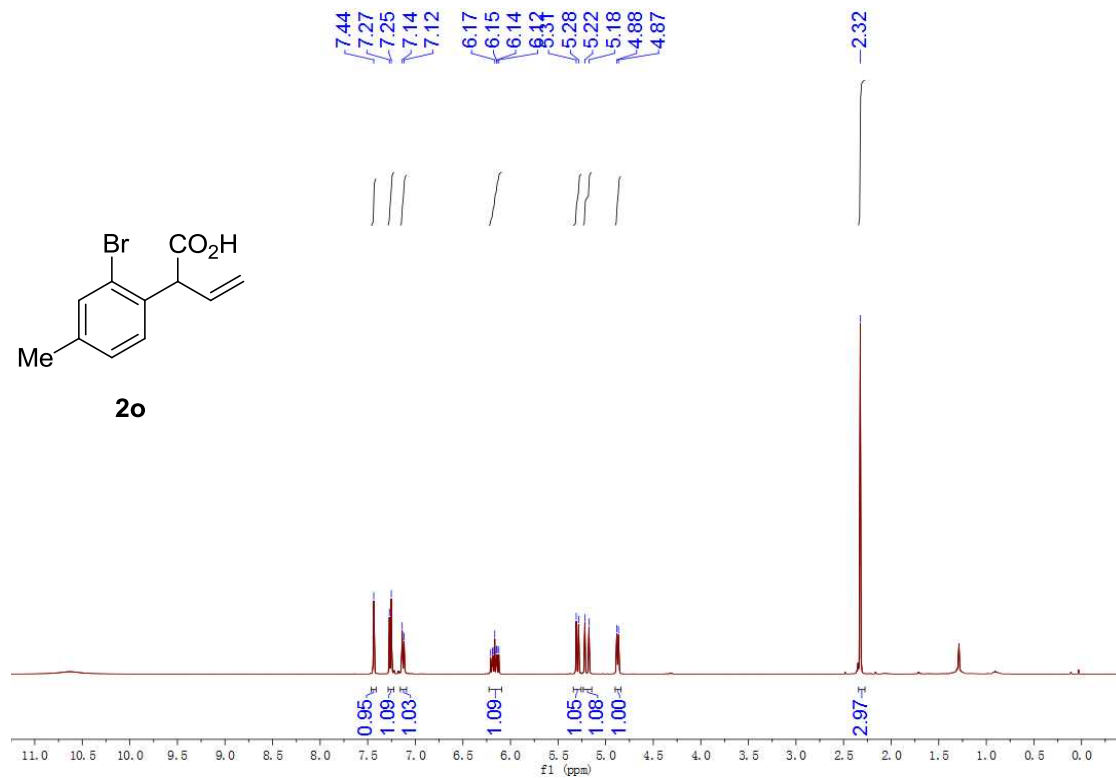

**<sup>13</sup>C NMR Spectrum of 2o (CDCl<sub>3</sub>)**

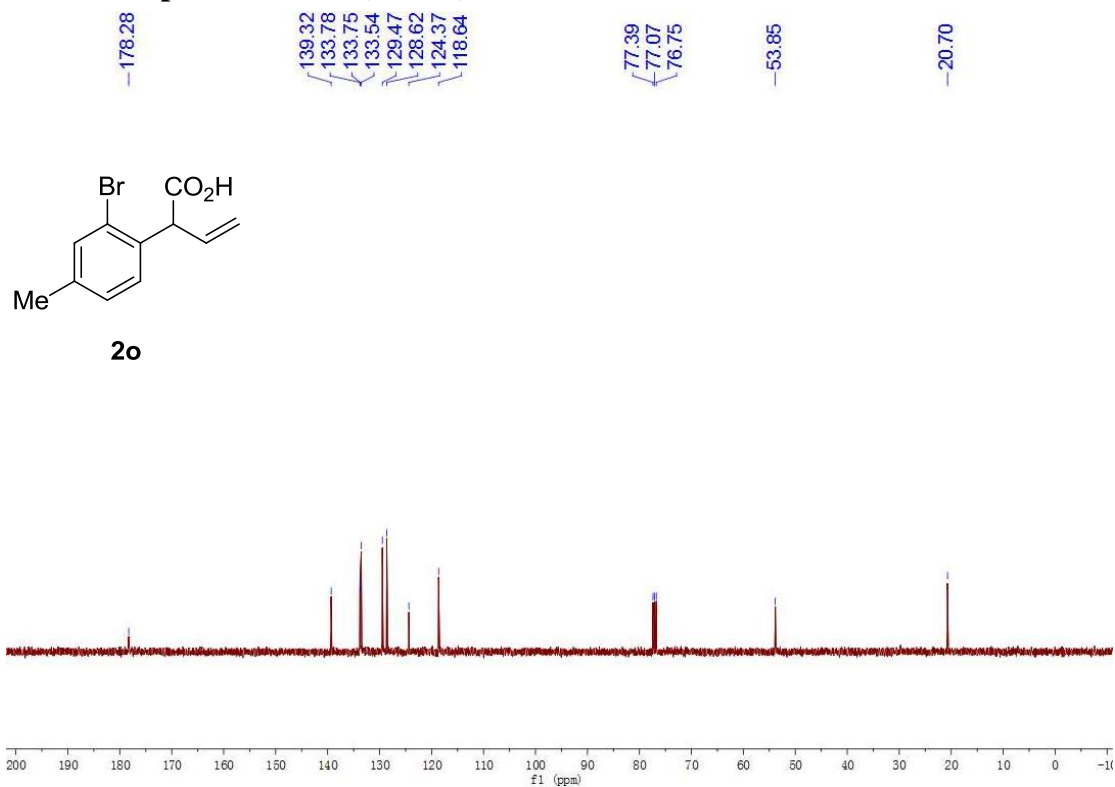

**<sup>1</sup>H NMR Spectrum of 2p (CDCl<sub>3</sub>)**

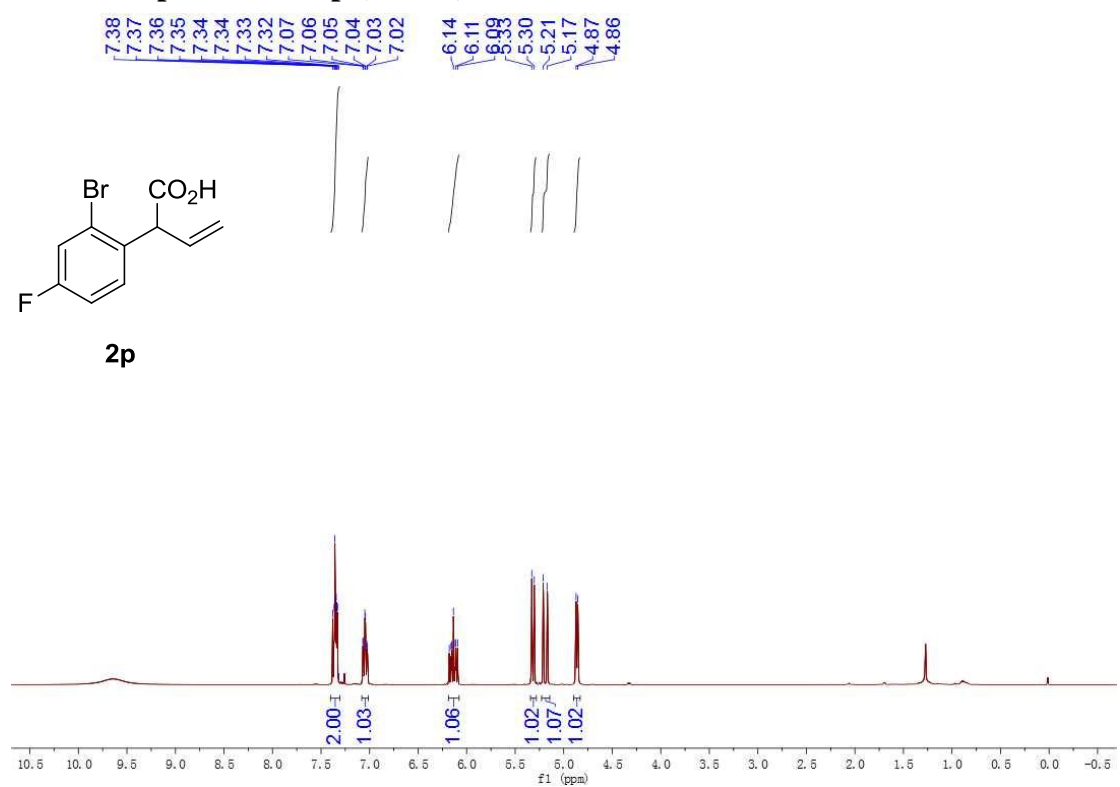

# <sup>13</sup>C NMR Spectrum of 2p (CDCl<sub>3</sub>)

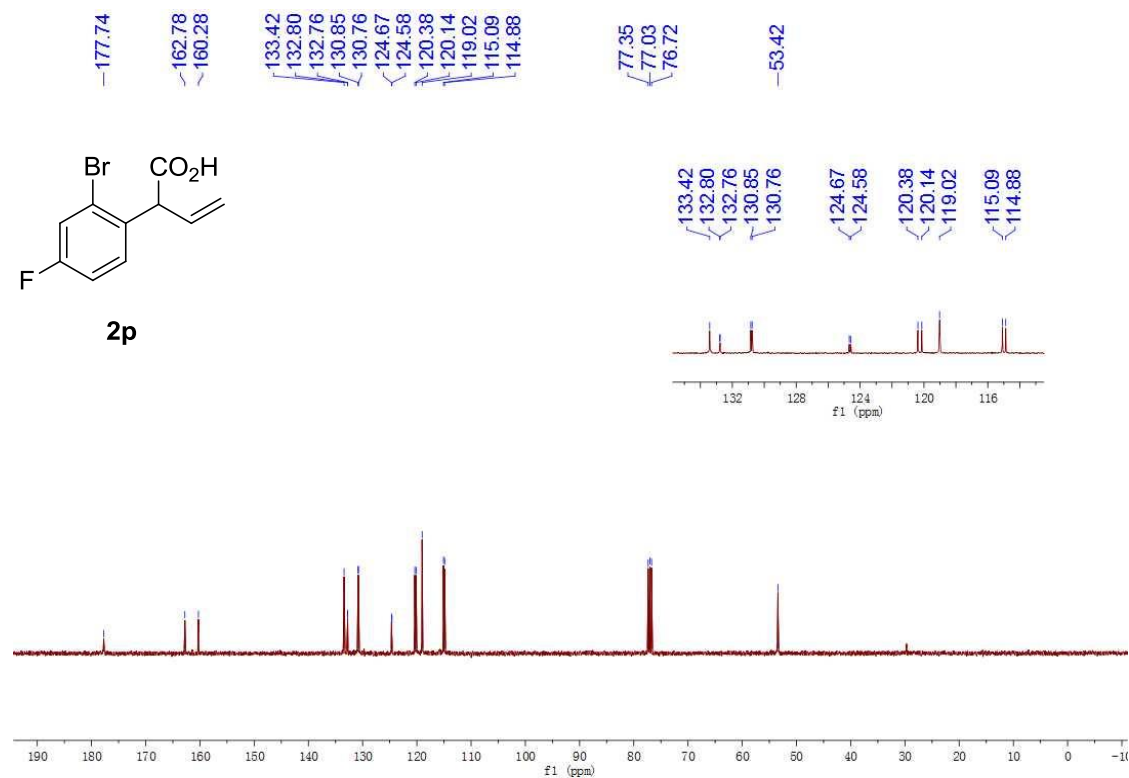

# <sup>19</sup>F NMR Spectrum of 2p (CDCl<sub>3</sub>)

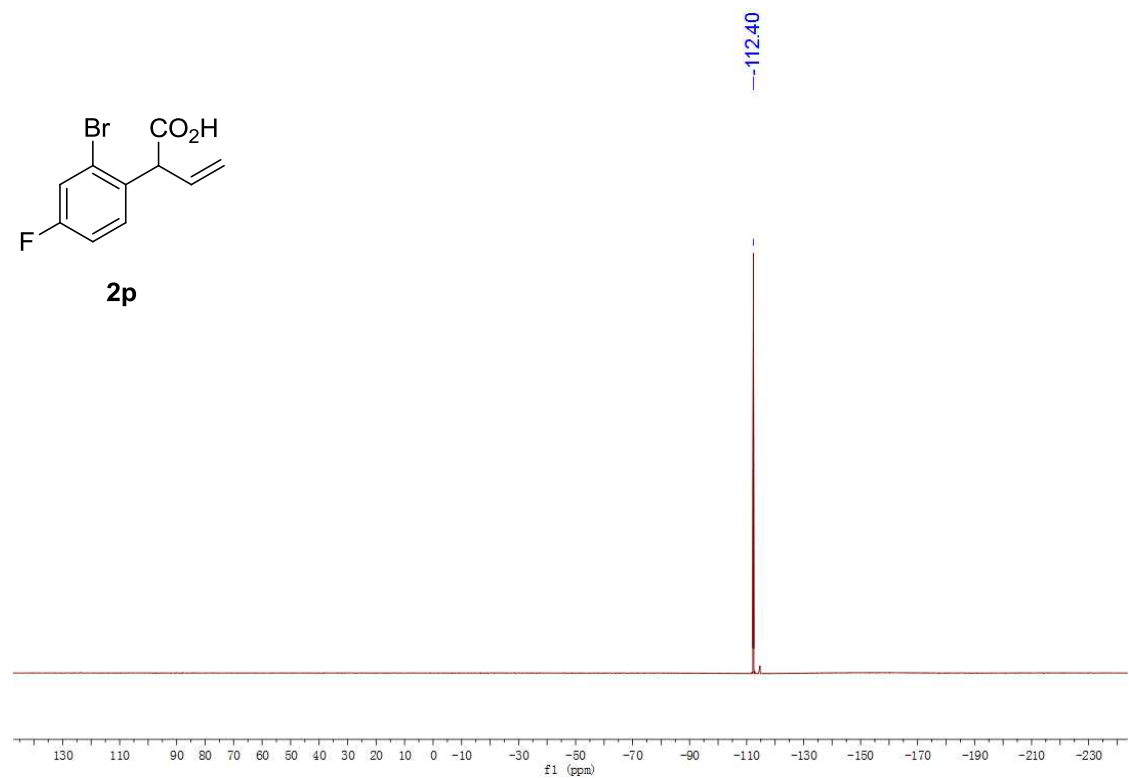

### <sup>1</sup>H NMR Spectrum of 2q (CDCl<sub>3</sub>)

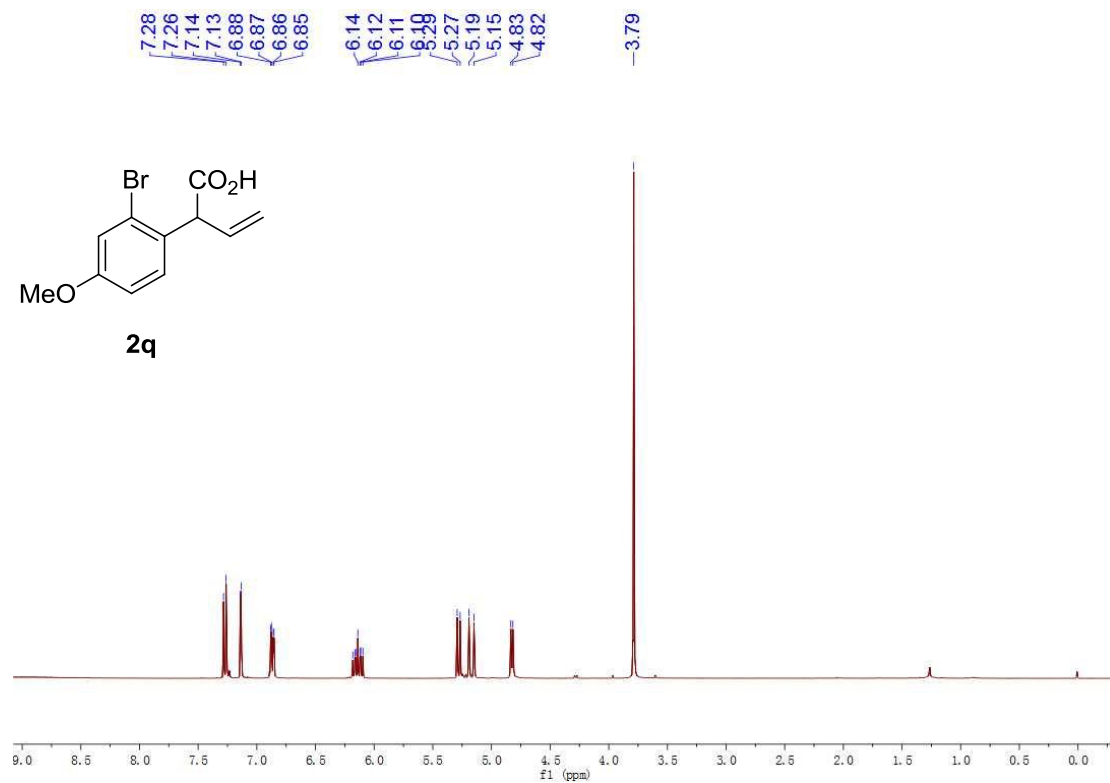

### <sup>13</sup>C NMR Spectrum of 2q (CDCl<sub>3</sub>)

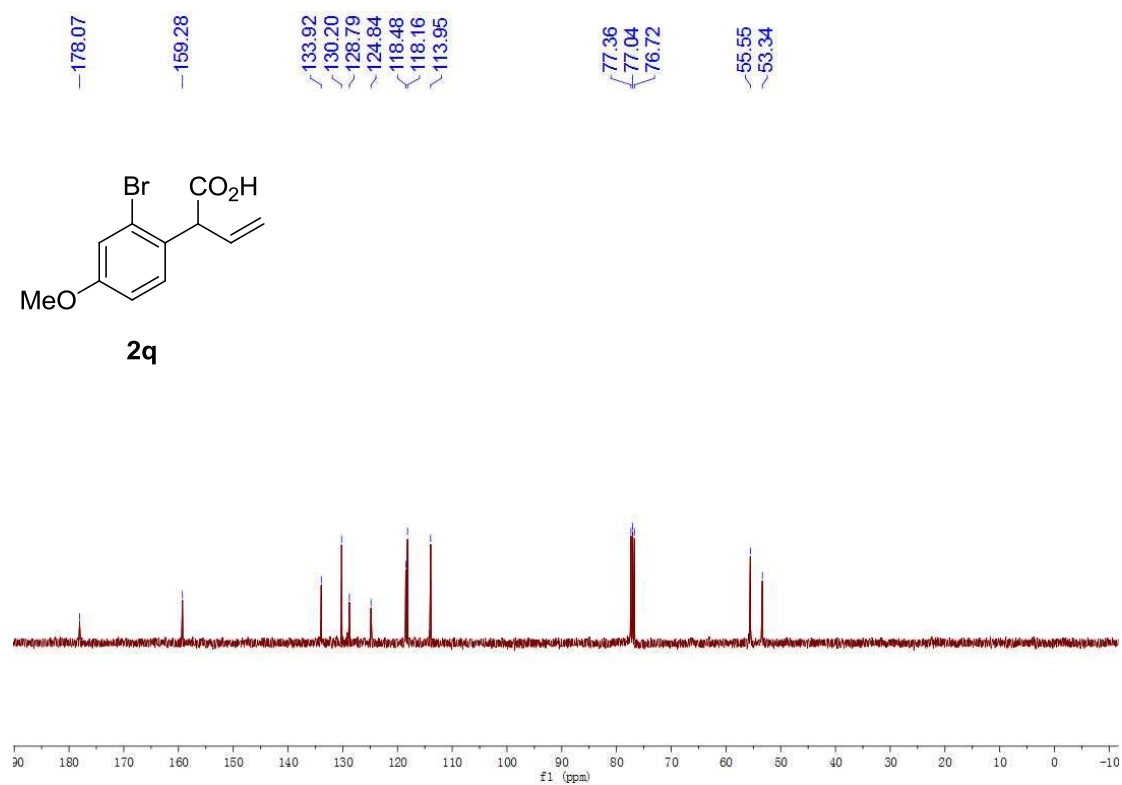



**<sup>1</sup>H NMR Spectrum of 2r (CDCl<sub>3</sub>)**

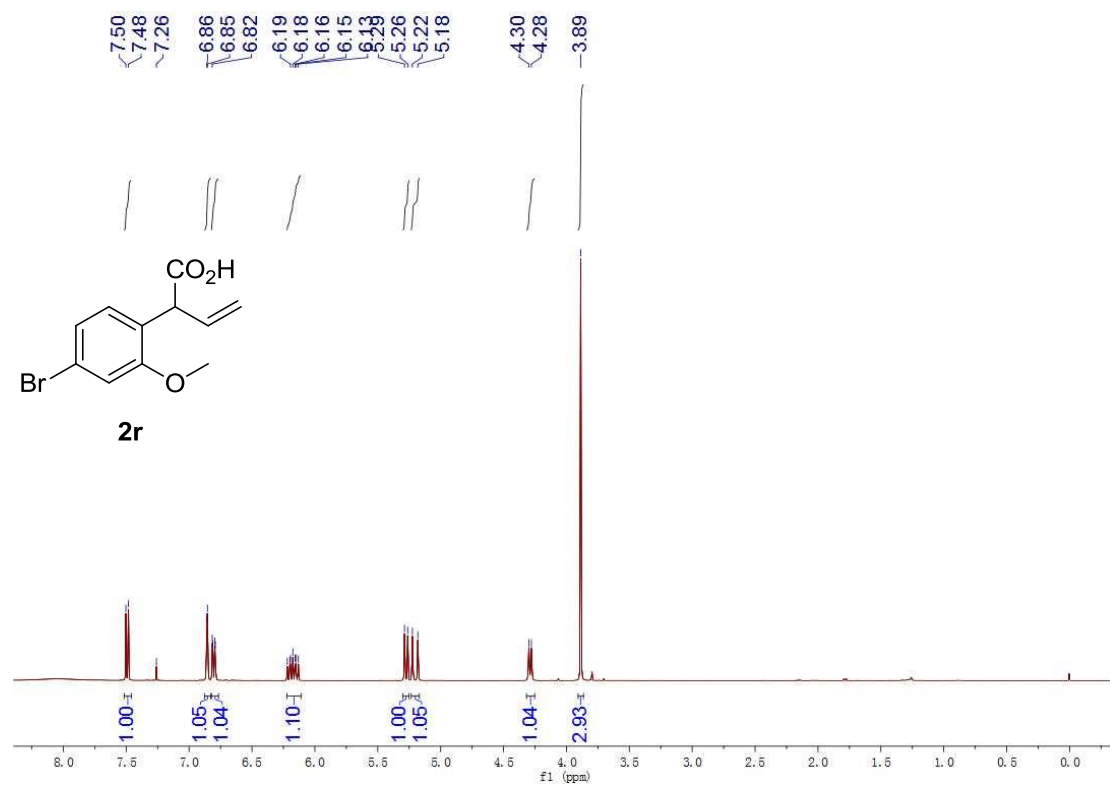

**<sup>13</sup>C NMR Spectrum of 2r (CDCl<sub>3</sub>)**

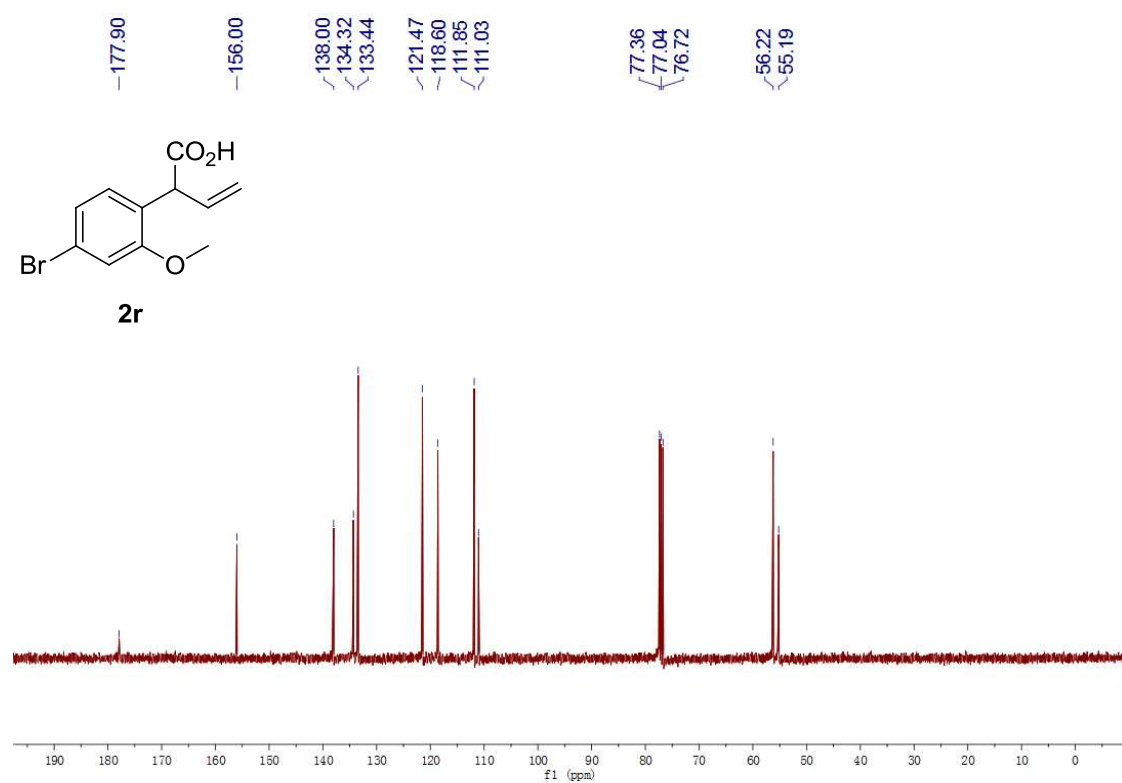

**<sup>1</sup>H NMR Spectrum of 2s (CDCl<sub>3</sub>)**

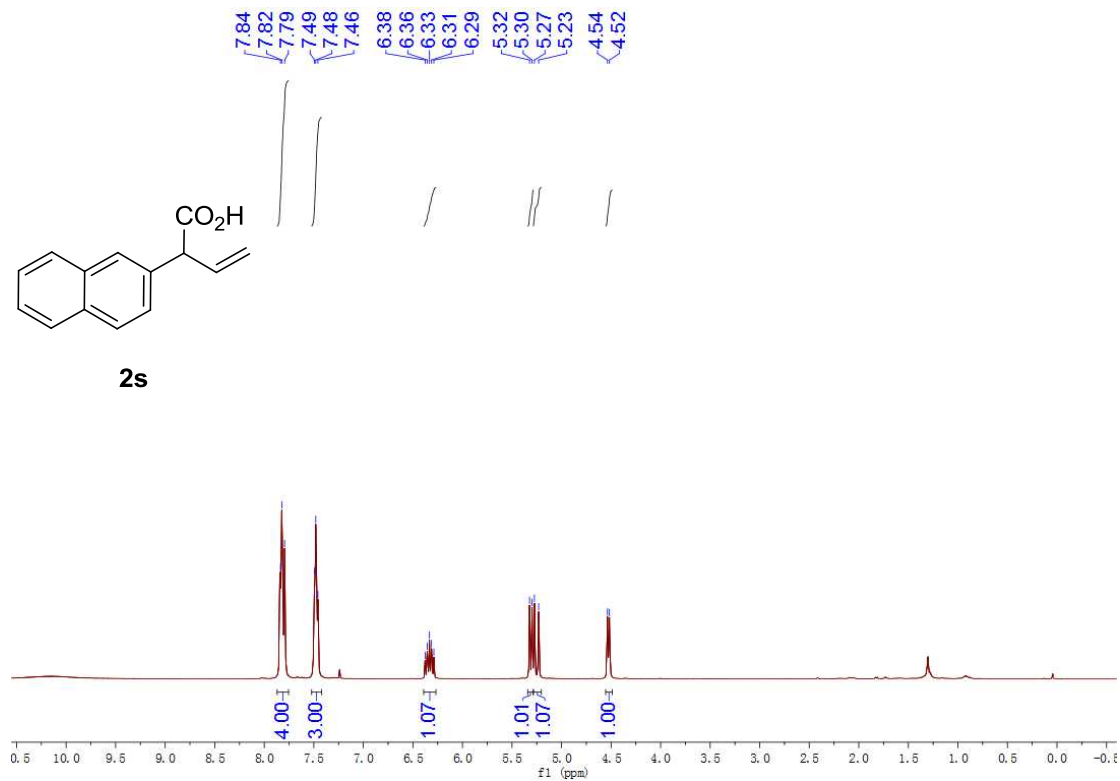

**<sup>13</sup>C NMR Spectrum of 2s (CDCl<sub>3</sub>)**

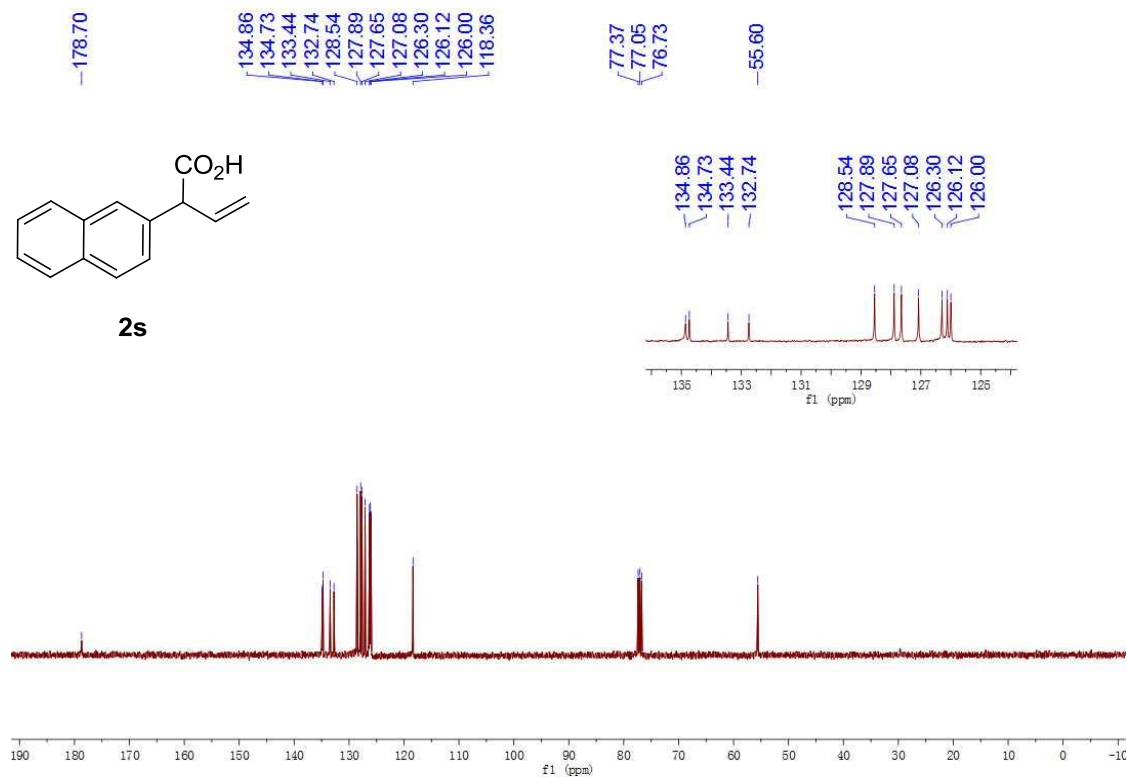

# **<sup>1</sup>H NMR Spectrum of 2t (CDCl<sub>3</sub>)**

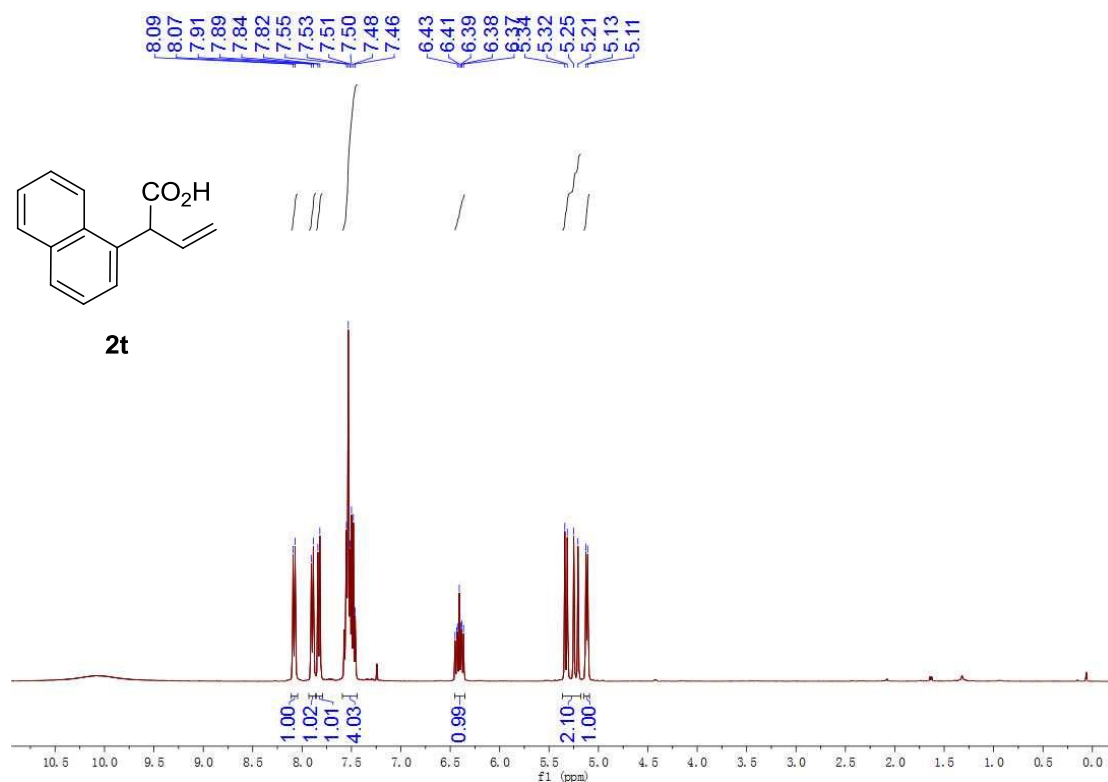

# **<sup>13</sup>C NMR Spectrum of 2t (CDCl<sub>3</sub>)**

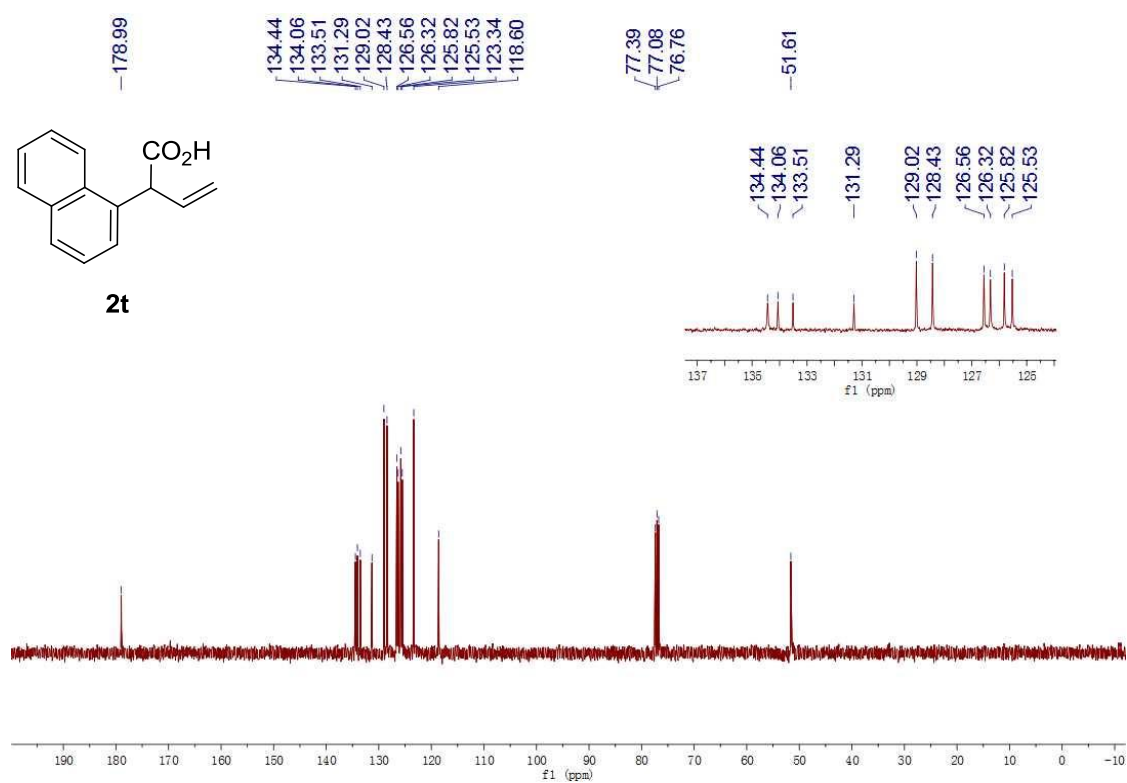

### <sup>1</sup>H NMR Spectrum of 2u (CDCl<sub>3</sub>)

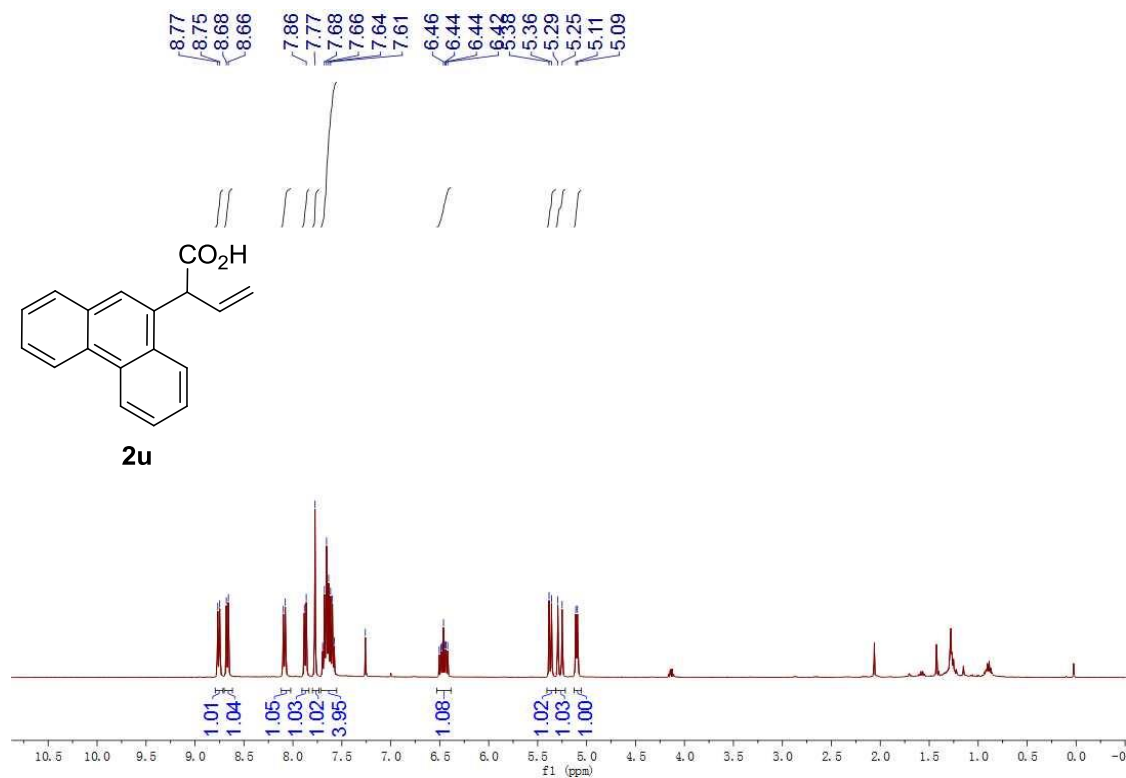

### <sup>13</sup>C NMR Spectrum of 2u (CDCl<sub>3</sub>)

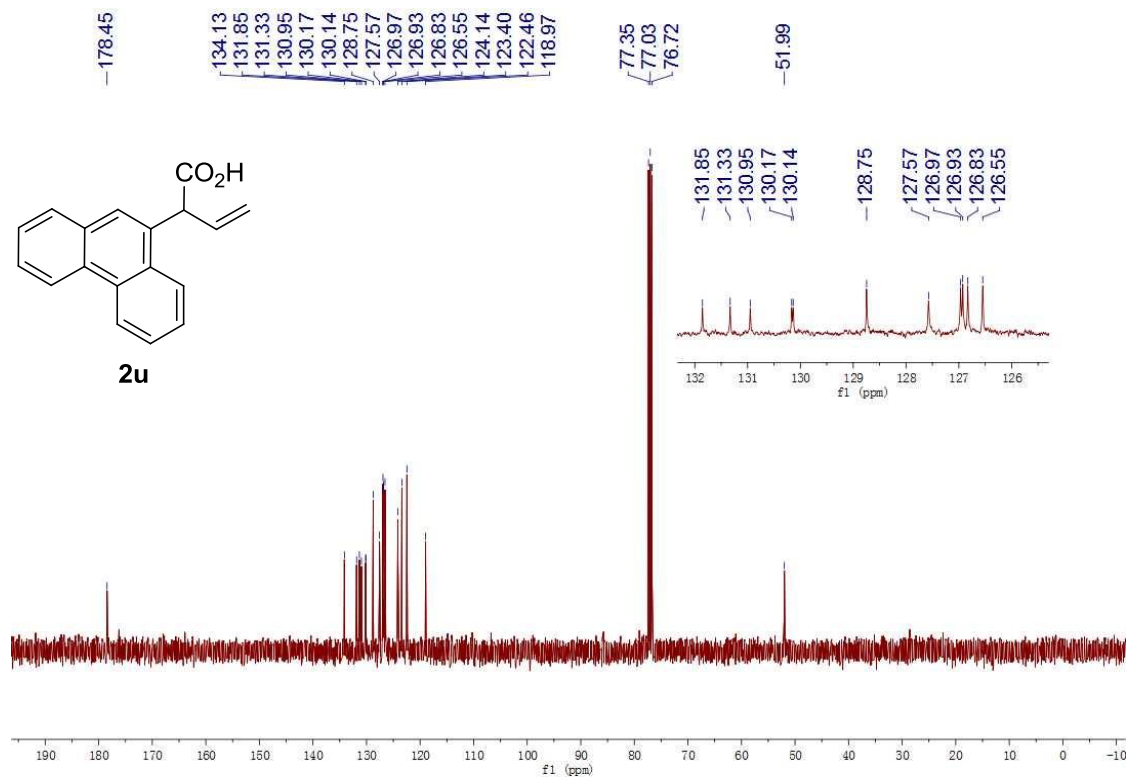

Supplement: c8qo00507a1.pdf [file c8qo00507a1.pdf]
